# Supplementary material for: Biofilm mediated synergistic degradation of hexadecane by a naturally formed community comprising Aspergillus flavus complex and Bacillus cereus group
Source: PubMed Central journal article supplement (PMC6489202; doi:10.1186/s12866-019-1460-4), 2019-04-29
Supplement: 12866_2019_1460_MOESM1_ESM.pdf [file 12866_2019_1460_MOESM1_ESM.pdf]

File : C:\msdchem\1\data\Madushika\2016.05.05\_MADUSHIKA\_MM1R1W1.D  
Operator  
Acquired : 5 May 2016 13:11 using AcqMethod Madushika.M  
Instrument : UOSJP GCMSD  
Sample Name :  
Misc Info : ERR  
Vial Number : 1

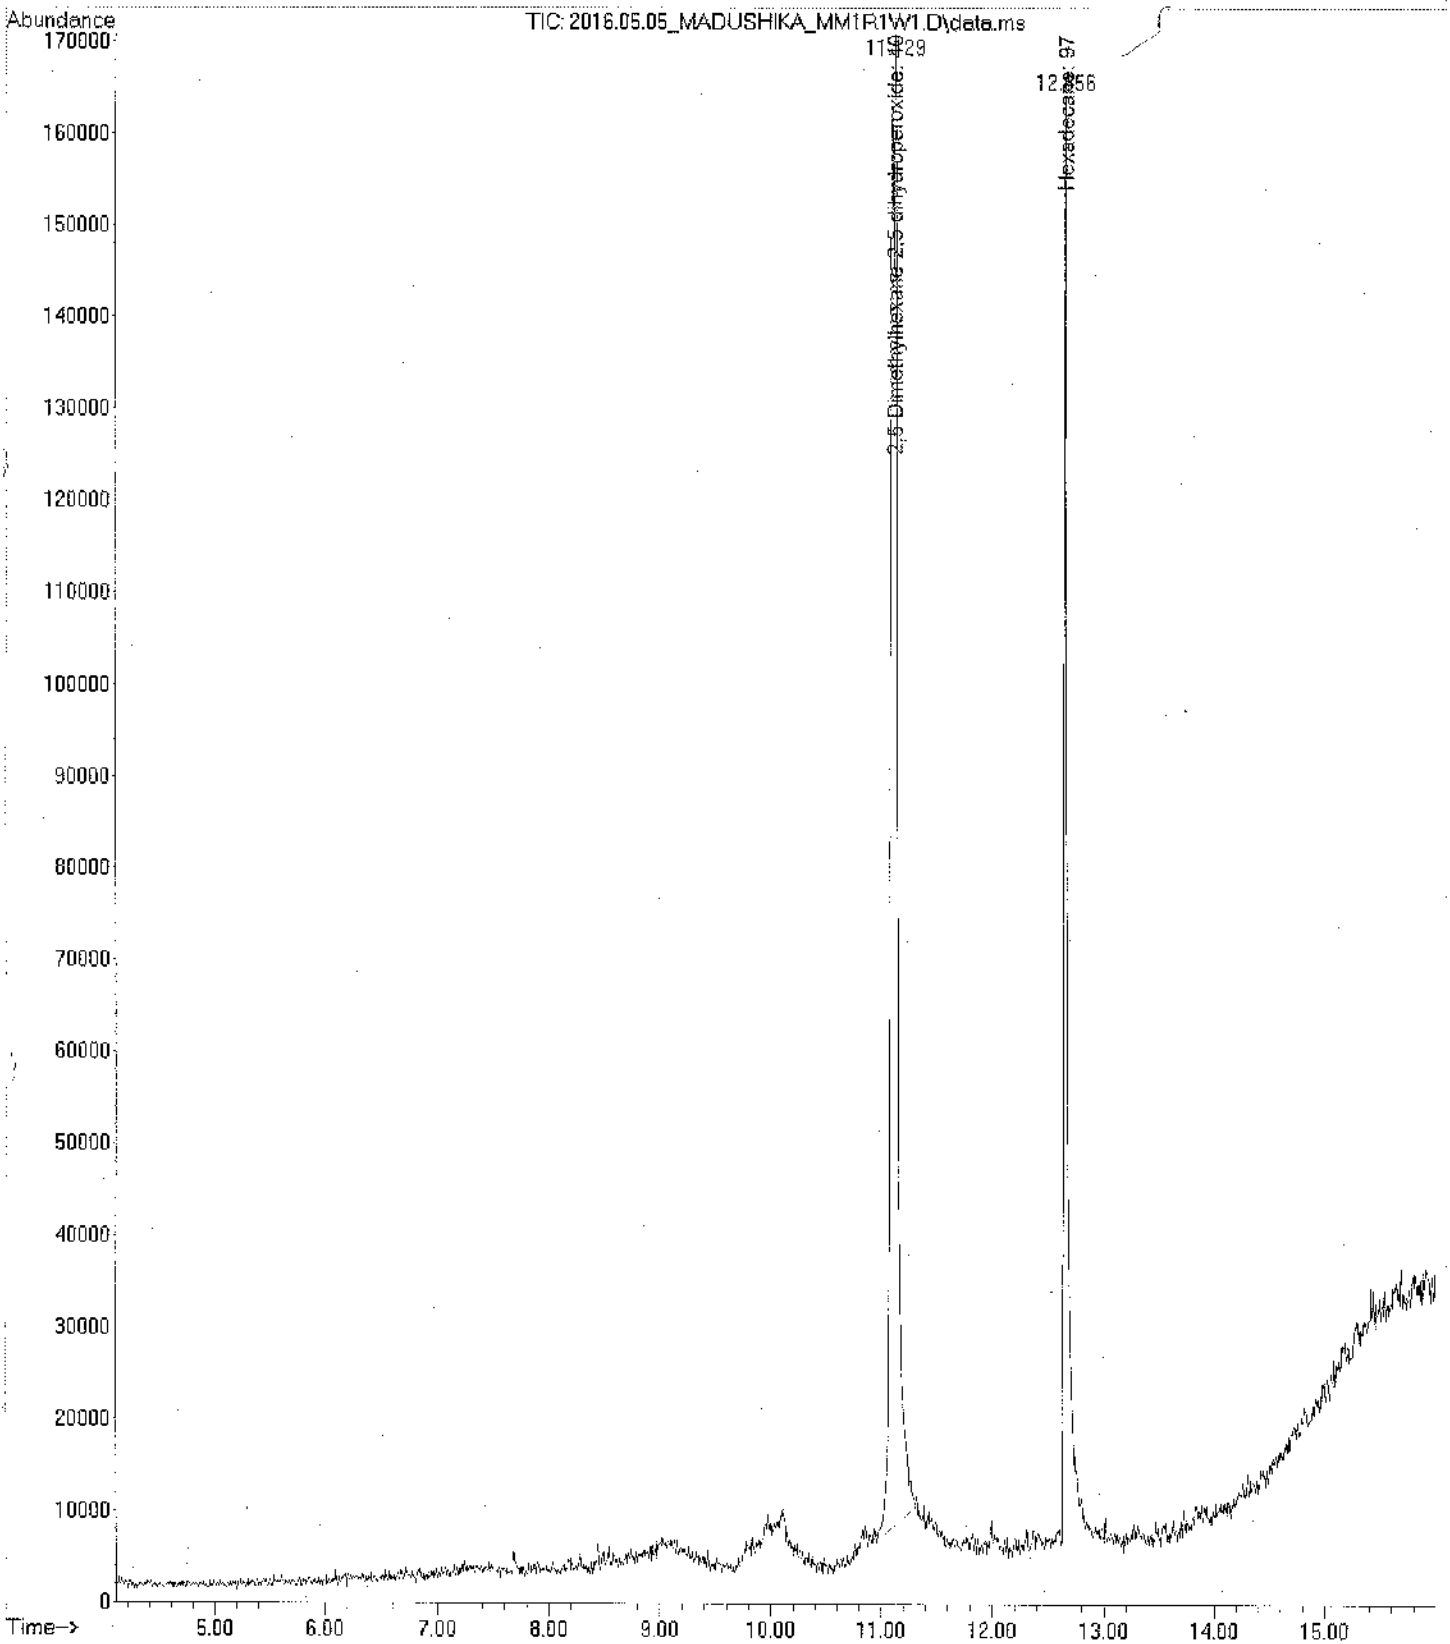

Area Percent Report

Data Path : C:\msdchem\1\data\Madushika\  
 Data File : 2016.05.05\_MADUSHIKA\_MM1R1W1.D  
 Acq On : 5 May 2016 13:11  
 Operator :  
 Sample :  
 Misc :  
 ALS Vial : 1 Sample Multiplier: 1

Integration Parameters: autoint1.e  
 Integrator: ChemStation

Method : C:\msdchem\1\methods\Calibration plot\_Ace.M  
 Title : autoint1.e

Signal : TIC: 2016.05.05\_MADUSHIKA\_MM1R1W1.D\data.ms

| peak # | R.T. min | first scan | max scan | last scan | PK TY | peak height | corr. area | corr. % max. | % of total |
|--------|----------|------------|----------|-----------|-------|-------------|------------|--------------|------------|
| 1      | 11.129   | 1165       | 1193     | 1224      | BB 4  | 155787      | 7255671    | 100.00%      | 67.728%    |
| 2      | 12.656   | 1444       | 1452     | 1479      | BB    | 144287      | 3457335    | 47.65%       | 32.272%    |

Sum of corrected areas: 10713005

Calibration plot\_Ace.M Thu May 05 14:06:26 2016

File : C:\msdchem\1\data\Madushika\2016.05.05\_MADUSHIKA\_MM1R2W1.D  
Operator :  
Acquired : 5 May 2016 12:31 using AcqMethod Madushika.M  
Instrument : UOSJP GCMSD  
Sample Name :  
Misc Info : ERR  
Vial Number : 1

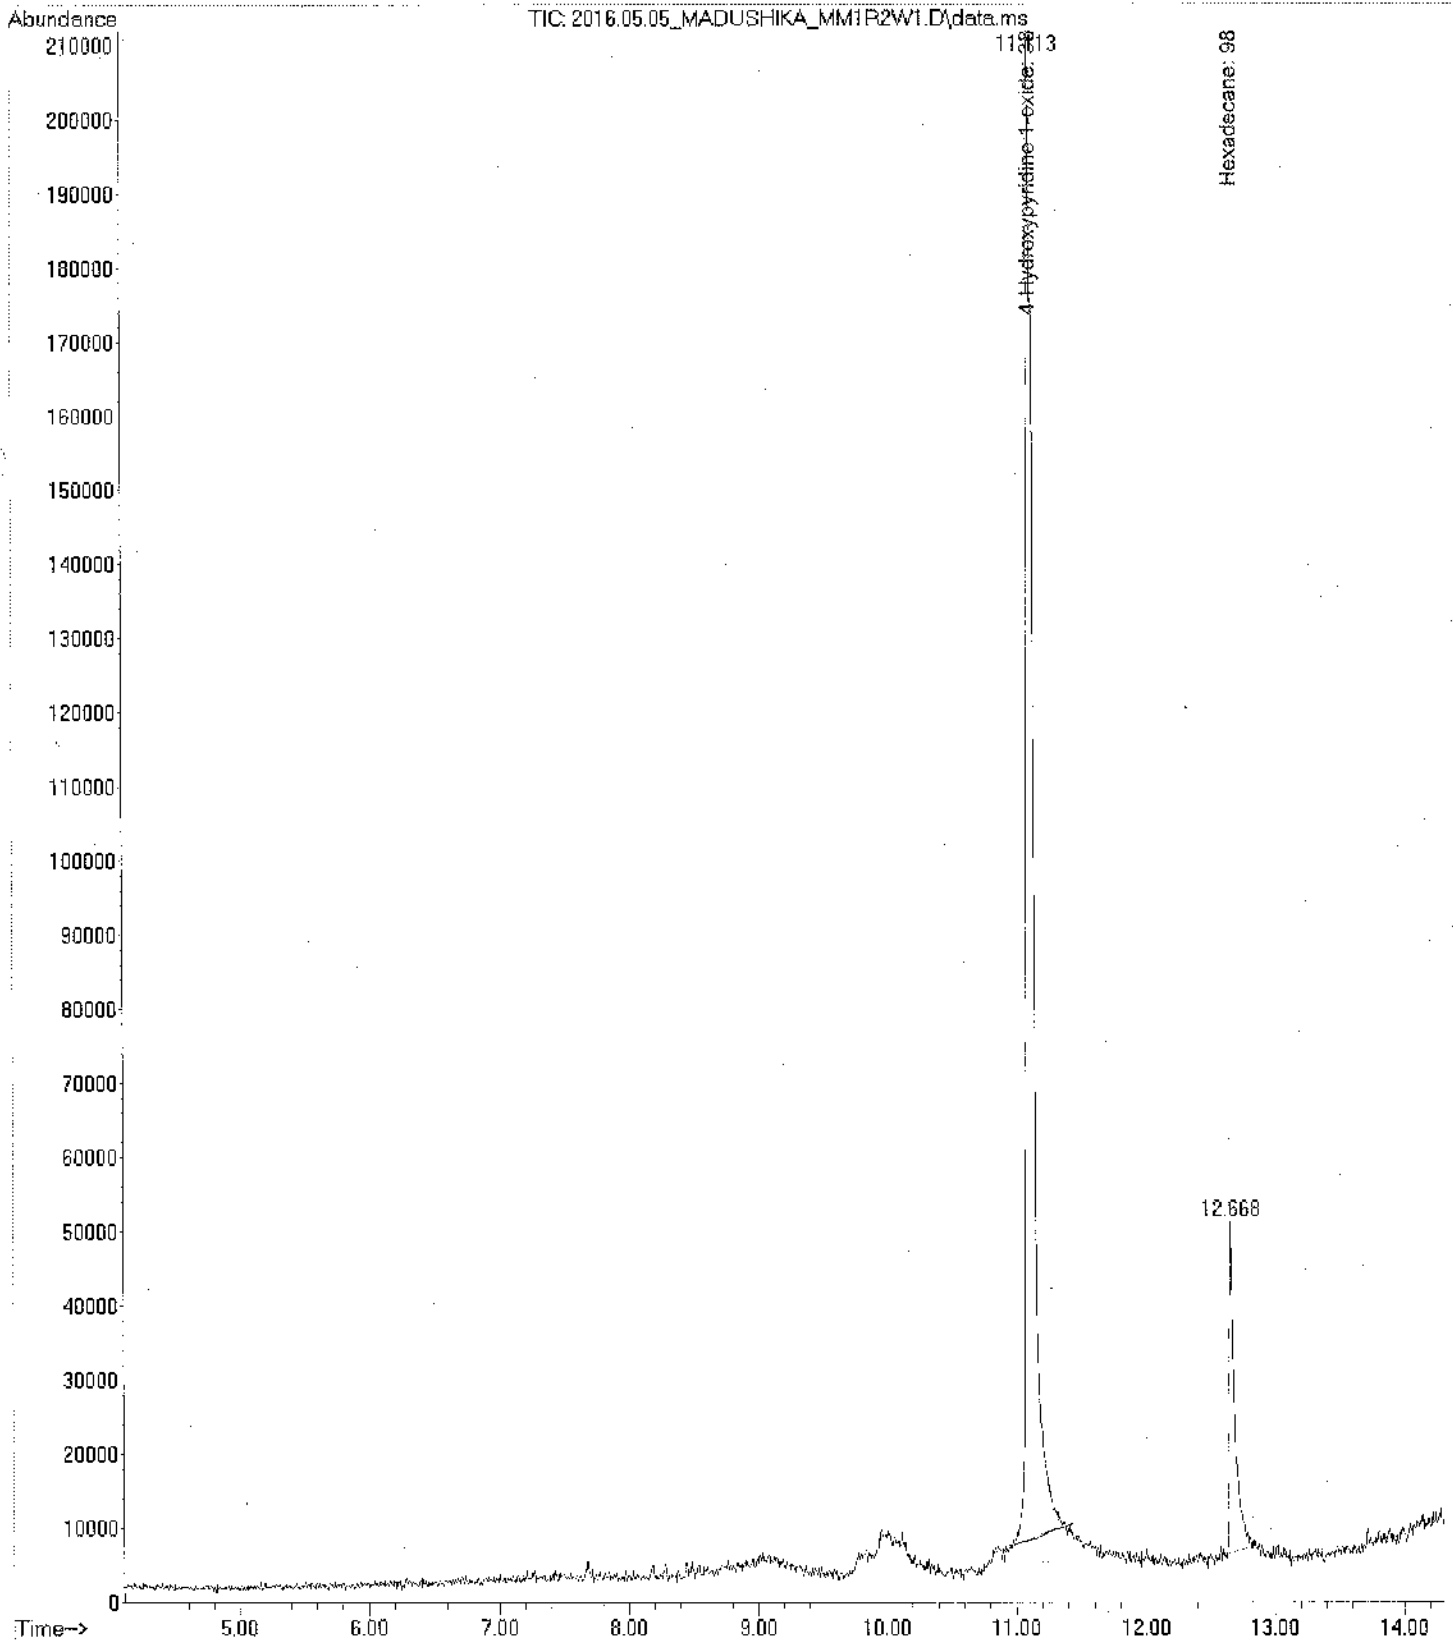

Area Percent Report

Data Path : C:\msdchem\1\data\Madushika\  
 Data File : 2016.05.05 MADUSHIKA\_MM1R2W1.D  
 Acq On : 5 May 2016 12:31  
 Operator :  
 Sample :  
 Misc :  
 ALS Vial : 1 Sample Multiplier: 1

Integration Parameters: autoint1.e  
 Integrator: ChemStation

Method : C:\msdchem\1\methods\Calibration plot\_Ace.M  
 Title : autoint1.e

Signal : TIC: 2016.05.05\_MADUSHIKA\_MM1R2W1.D\data.ms

| peak # | R.T. min | first scan | max scan | last scan | PK TY | peak height | corr. area | corr. % max. | % of total |
|--------|----------|------------|----------|-----------|-------|-------------|------------|--------------|------------|
| 1      | 11.113   | 1155       | 1190     | 1233      | BB    | 195731      | 7978802    | 100.00%      | 86.374%    |
| 2      | 12.668   | 1430       | 1454     | 1479      | BB    | 42734       | 1258721    | 15.78%       | 13.626%    |

Sum of corrected areas: 9237523

Calibration plot\_Ace.M Thu May 05 14:07:11 2016

File : C:\msdchem\1\data\Madushika\2016.05.05\_MADUSHIKA\_MM1R3W1.D  
Operator :  
Acquired : 5 May 2016 13:32 using AcqMethod Madushika.M  
Instrument : UOSJP GCMSD  
Sample Name :  
Misc Info : ERR  
Vial Number : 1

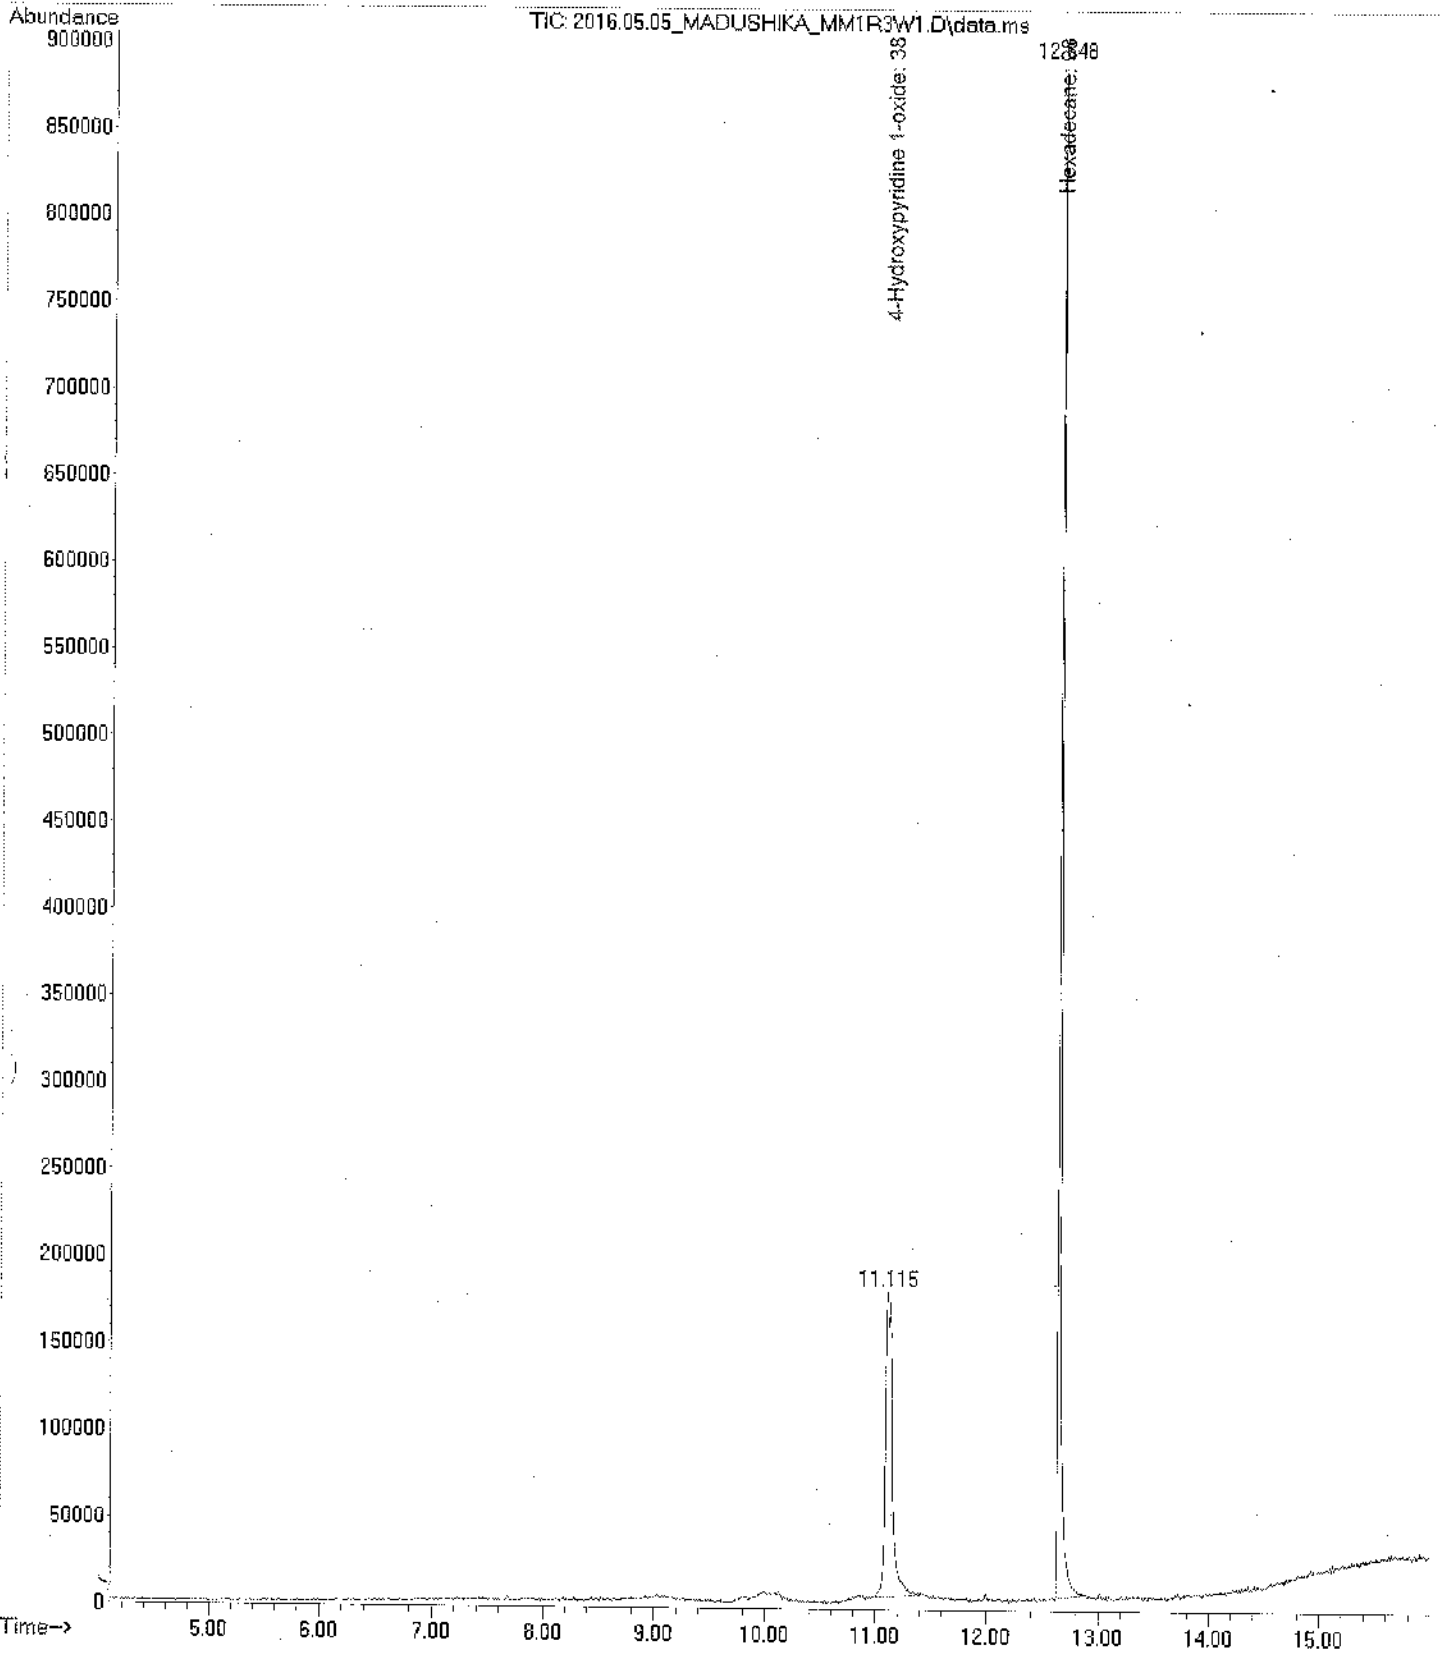

## Area Percent Report

Data Path : C:\msdchem\1\data\Madushika\  
Data File : 2016.05.05\_MADUSHIKA\_MM1R3W1.D  
Acq On : 5 May 2016 13:32  
Operator :  
Sample :  
Misc :  
ALS Vial : 1 Sample Multiplier: 1

Integration Parameters: autoint1.e  
Integrator: ChemStation

Method : C:\msdchem\1\methods\Calibration plot\_Ace.M  
Title : autoint1.e

Signal : TIC: 2016.05.05\_MADUSHIKA\_MM1R3W1.D\data.ms

| peak # | R.T. min | first scan | max scan | last scan | PK TY | peak height | corr. area | corr. % max. | % of total |
|--------|----------|------------|----------|-----------|-------|-------------|------------|--------------|------------|
| 1      | 11.115   | 1156       | 1191     | 1239      | BB 2  | 169853      | 7772185    | 64.72%       | 39.290%    |
| 2      | 12.648   | 1426       | 1450     | 1489      | BB    | 866123      | 12009371   | 100.00%      | 60.710%    |

Sum of corrected areas: 19781556

Calibration plot\_Ace.M Thu May 05 14:07:46 2016

File : C:\msdchem\1\data\Madushika\2016.05.05\_MADUSHIKA\_MM1C2W1.D  
Operator  
Acquired : 5 May 2016 14:15 using AcqMethod Madushika.M  
Instrument : UOSJP GCMSD  
Sample Name:  
Misc Info : ERR  
Vial Number: 1

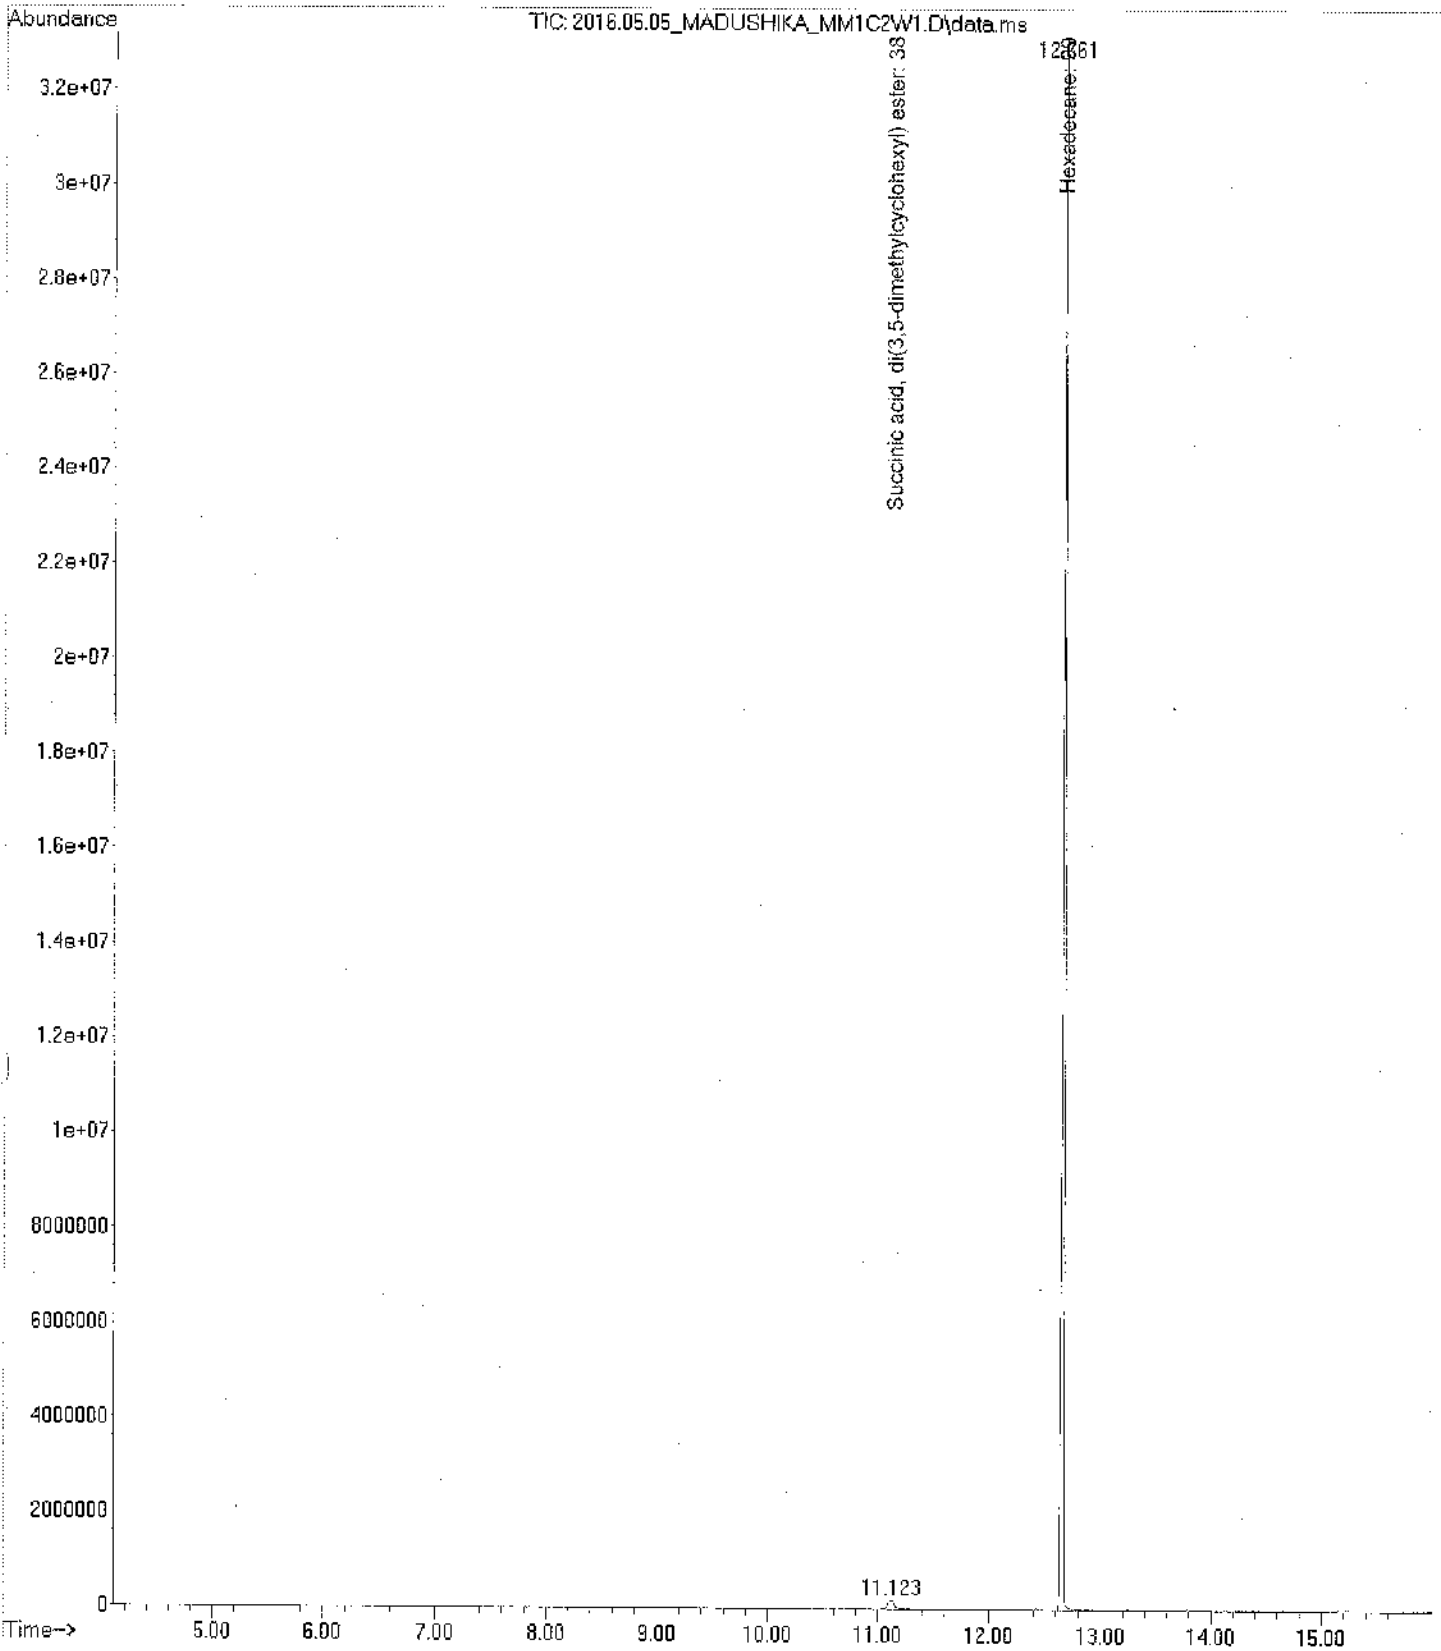

Area Percent Report

Data Path : C:\msdchem\1\data\Madushika\  
 Data File : 2016.05.05\_MADUSHIKA\_MM1C2W1.D  
 Acq On : 5 May 2016 14:15  
 Operator :  
 Sample :  
 Misc :  
 ALS Vial : 1 Sample Multiplier: 1

Integration Parameters: autoint1.e  
 Integrator: ChemStation

Method : C:\msdchem\1\methods\Calibration plot\_Ace.M  
 Title : autoint1.e

Signal : TIC: 2016.05.05\_MADUSHIKA\_MM1C2W1.D\data.ms

| peak # | R.T. min | first scan | max scan | last scan | PK TY | peak height | corr. area | corr. % max. | % of total |
|--------|----------|------------|----------|-----------|-------|-------------|------------|--------------|------------|
| 1      | 11.123   | 1164       | 1192     | 1224      | BB 3  | 163083      | 7573598    | 1.79%        | 1.756%     |
| 2      | 12.661   | 1408       | 1452     | 1493      | BB    | 31371039    | 423681039  | 100.00%      | 98.244%    |

Sum of corrected areas: 431254638

Calibration plot\_Ace.M Thu May 05 14:48:57 2016



File : C:\msdchem\1\data\Madushika\2016.05.05\_MADUSHIKA\_MM1C3W1.D  
Operator :  
Acquired : 5 May 2016 14:38 using AcqMethod Madushika.M  
Instrument : UOSJP GCMSD  
Sample Name :  
Misc Info : ERR  
Vial Number: 1

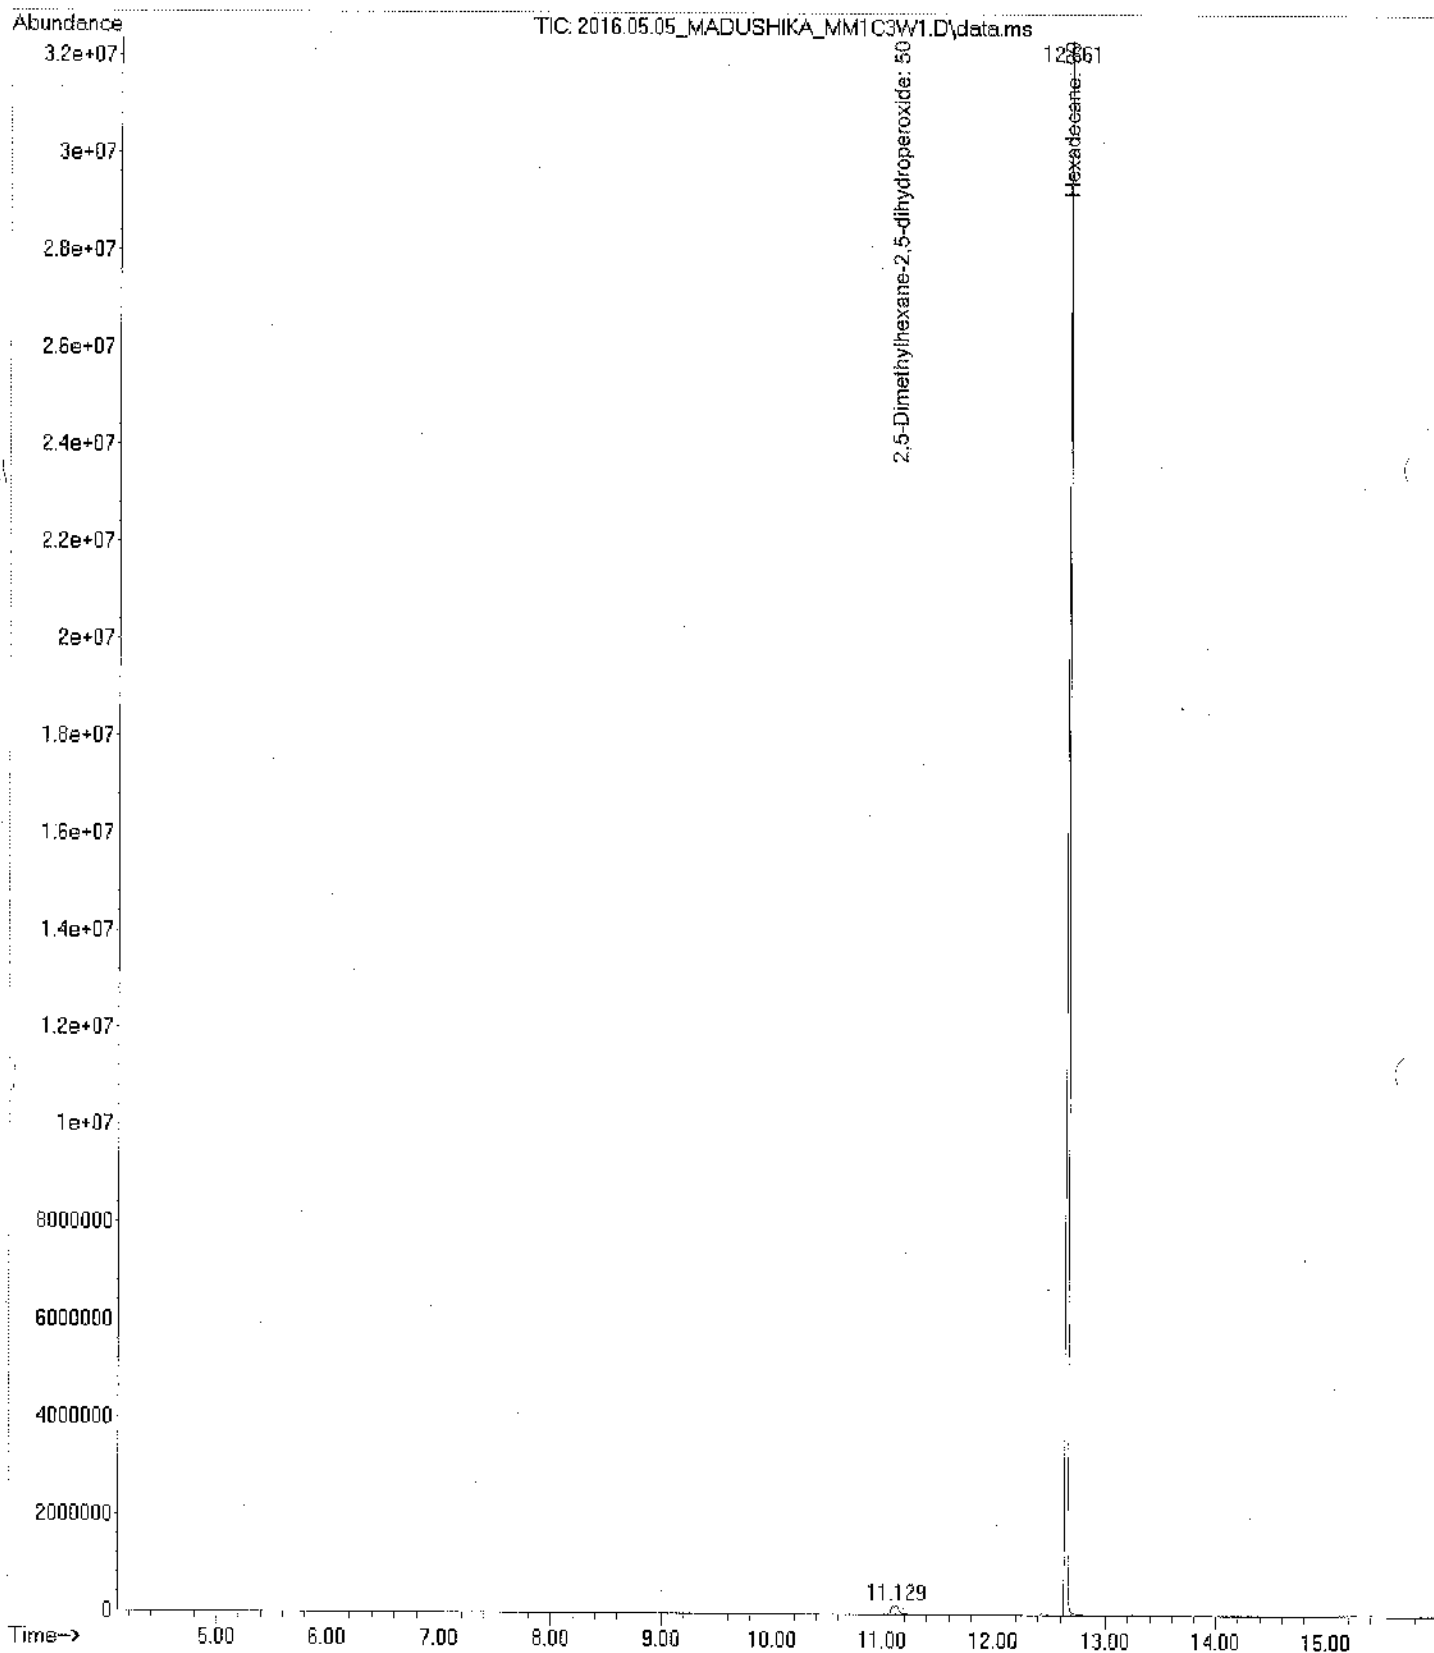

Area Percent Report

Data Path : C:\msdchem\1\data\Madushika\  
 Data File : 2016.05.05\_MADUSHIKA\_MM1C3W1.D  
 Acq On : 5 May 2016 14:38  
 Operator :  
 Sample :  
 Misc :  
 ALS Vial : 1 Sample Multiplier: 1

Integration Parameters: autoint1.e  
 Integrator: ChemStation

Method : C:\msdchem\1\methods\Calibration plot\_Ace.M  
 Title : autoint1.e

Signal : TIC: 2016.05.05\_MADUSHIKA\_MM1C3W1.D\data.ms

| peak # | R.T. min | first scan | max scan | last scan | PK TY | peak height | corr. area | corr. % max. | % of total |
|--------|----------|------------|----------|-----------|-------|-------------|------------|--------------|------------|
| 1      | 11.129   | 1159       | 1193     | 1223      | BB 2  | 177412      | 8541971    | 2.10%        | 2.059%     |
| 2      | 12.661   | 1405       | 1452     | 1495      | BB    | 30476237    | 406225867  | 100.00%      | 97.941%    |

Sum of corrected areas: 414767838

Calibration plot\_Ace.M Thu May 05 14:57:05 2016

File : C:\msdchem\1\data\Madushika\1\_MM9R1W1.D  
Operator :  
Acquired : 11 May 2016 10:19 using AcqMethod MADUSHIKA.M  
Instrument : UOSJP GCMSD  
Sample Name : 1\_MM9R1W1  
Misc Info :  
Vial Number : 1 ERR

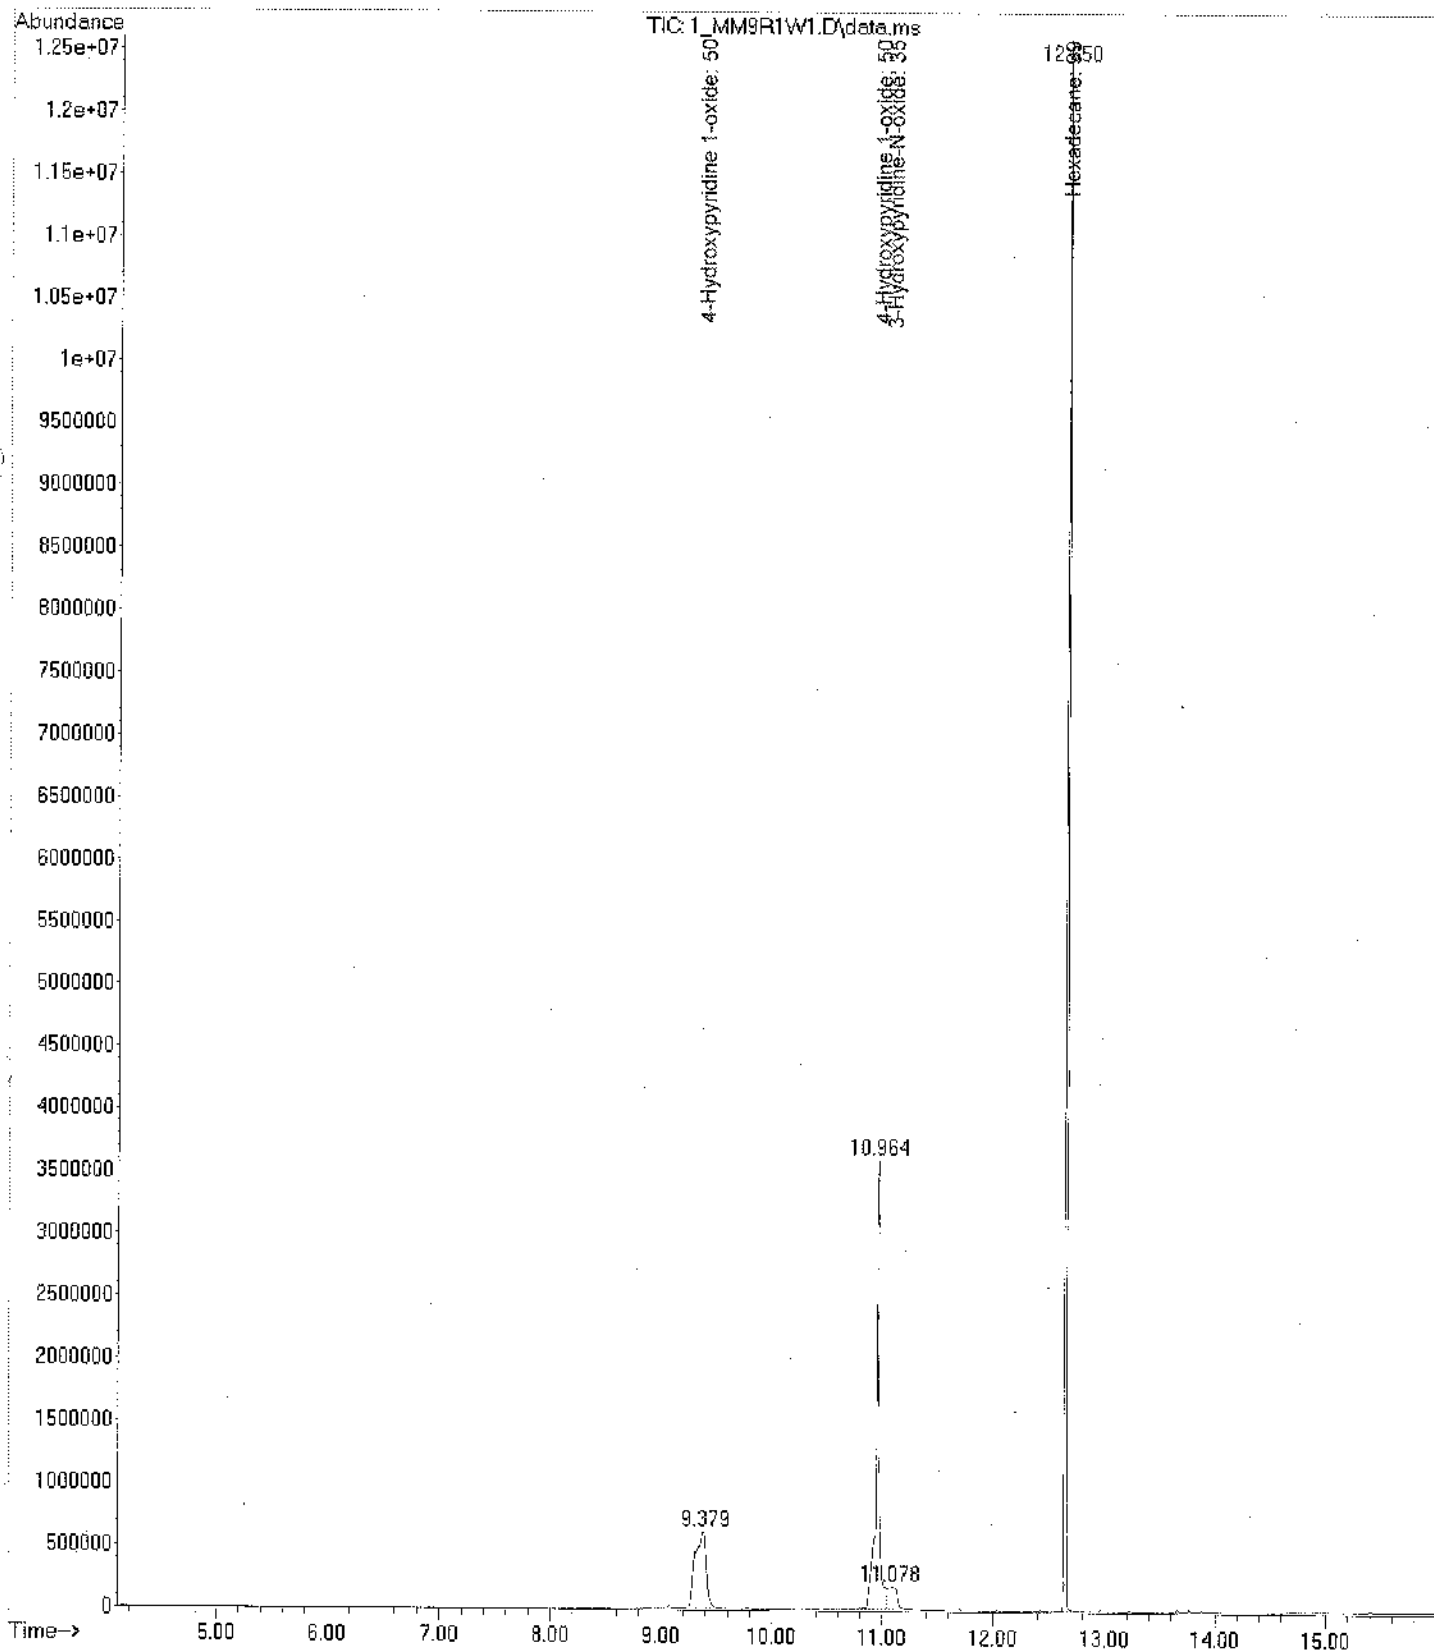

Area Percent Report

Data Path : C:\msdchem\1\data\Madushika\  
 Data File : 1\_MM9R1W1.D  
 Acq On : 11 May 2016 10:19  
 Operator :  
 Sample : 1\_MM9R1W1  
 Misc :  
 ALS Vial : 1 Sample Multiplier: 1

Integration Parameters: autoint1.e  
 Integrator: ChemStation

Method : C:\msdchem\1\methods\Calibration plot\_Ace.M  
 Title : autoint1.e

Signal : TIC: 1\_MM9R1W1.D\data.ms

| peak # | R.T. min | first scan | max scan | last scan | PK TY | peak height | corr. area | corr. % max. | % of total |
|--------|----------|------------|----------|-----------|-------|-------------|------------|--------------|------------|
| 1      | 9.379    | 857        | 897      | 935       | BB 2  | 599019      | 43821933   | 33.28%       | 16.938%    |
| 2      | 10.964   | 1117       | 1165     | 1179      | BV    | 3586592     | 71846991   | 54.57%       | 27.771%    |
| 3      | 11.078   | 1179       | 1184     | 1223      | VB 2  | 185381      | 11380644   | 8.64%        | 4.399%     |
| 4      | 12.650   | 1405       | 1451     | 1473      | BB    | 12094218    | 131666622  | 100.00%      | 50.892%    |

Sum of corrected areas: 258716190

Calibration plot\_Ace.M Fri May 13 10:11:15 2016

File : C:\msdchem\1\data\Madushika\2\_MM9R2W1.D  
Operator :  
Acquired : 11 May 2016 10:40 using AcqMethod MADUSHIKA.M  
Instrument : UOSJP GCMSD  
Sample Name : 2\_MM9R2W1  
Misc Info : ERR  
Vial Number : 2

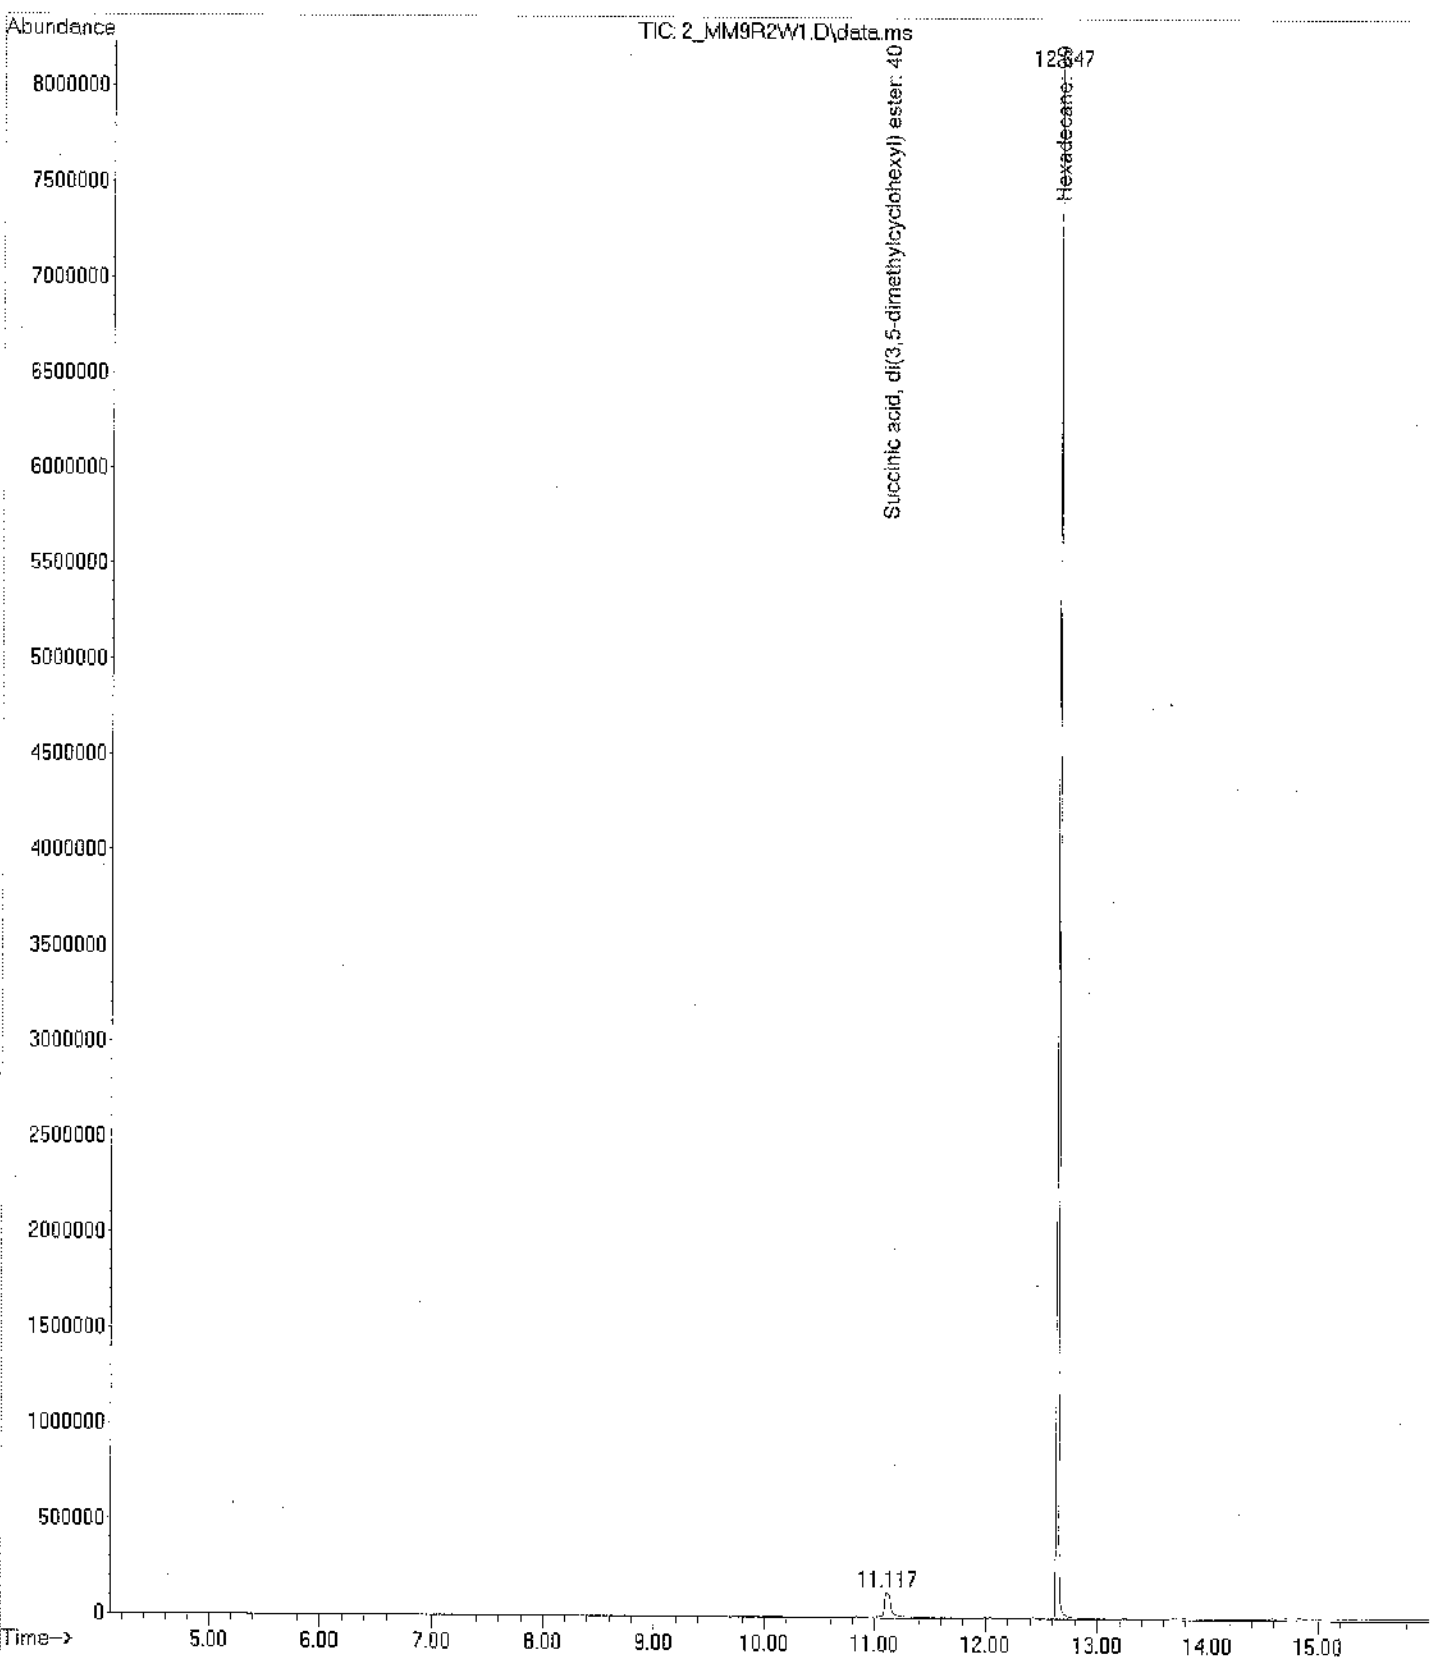

Area Percent Report

Data Path : C:\msdchem\1\data\Madushika\  
 Data File : 2\_MM9R2W1.D  
 Acq On : 11 May 2016 10:40  
 Operator :  
 Sample : 2\_MM9R2W1  
 Misc :  
 ALS Vial : 2 Sample Multiplier: 1

Integration Parameters: autoint1.e  
 Integrator: ChemStation

Method : C:\msdchem\1\methods\Calibration plot\_Ace.M  
 Title : autoint1.e

Signal : TIC: 2\_MM9R2W1.D\data.ms

| peak # | R.T. min | first scan | max scan | last scan | PK TY | peak height | corr. area | corr. % max. | % of total |
|--------|----------|------------|----------|-----------|-------|-------------|------------|--------------|------------|
| 1      | 11.117   | 1165       | 1191     | 1214      | BB    | 121789      | 4769043    | 6.07%        | 5.721%     |
| 2      | 12.647   | 1430       | 1450     | 1481      | BB    | 8005417     | 78592615   | 100.00%      | 94.279%    |

Sum of corrected areas: 83361658

Calibration plot\_Ace.M Fri May 13 10:12:27 2016

File : C:\msdchem\1\data\Madushika\3\_MM9R3W1.D  
Operator :  
Acquired : 11 May 2016 11:01 using AcqMethod MADUSHIKA.M  
Instrument : UOSJP GCMSD  
Sample Name : 3\_MM9R3W1  
Misc Info : ERR  
Vial Number: 3

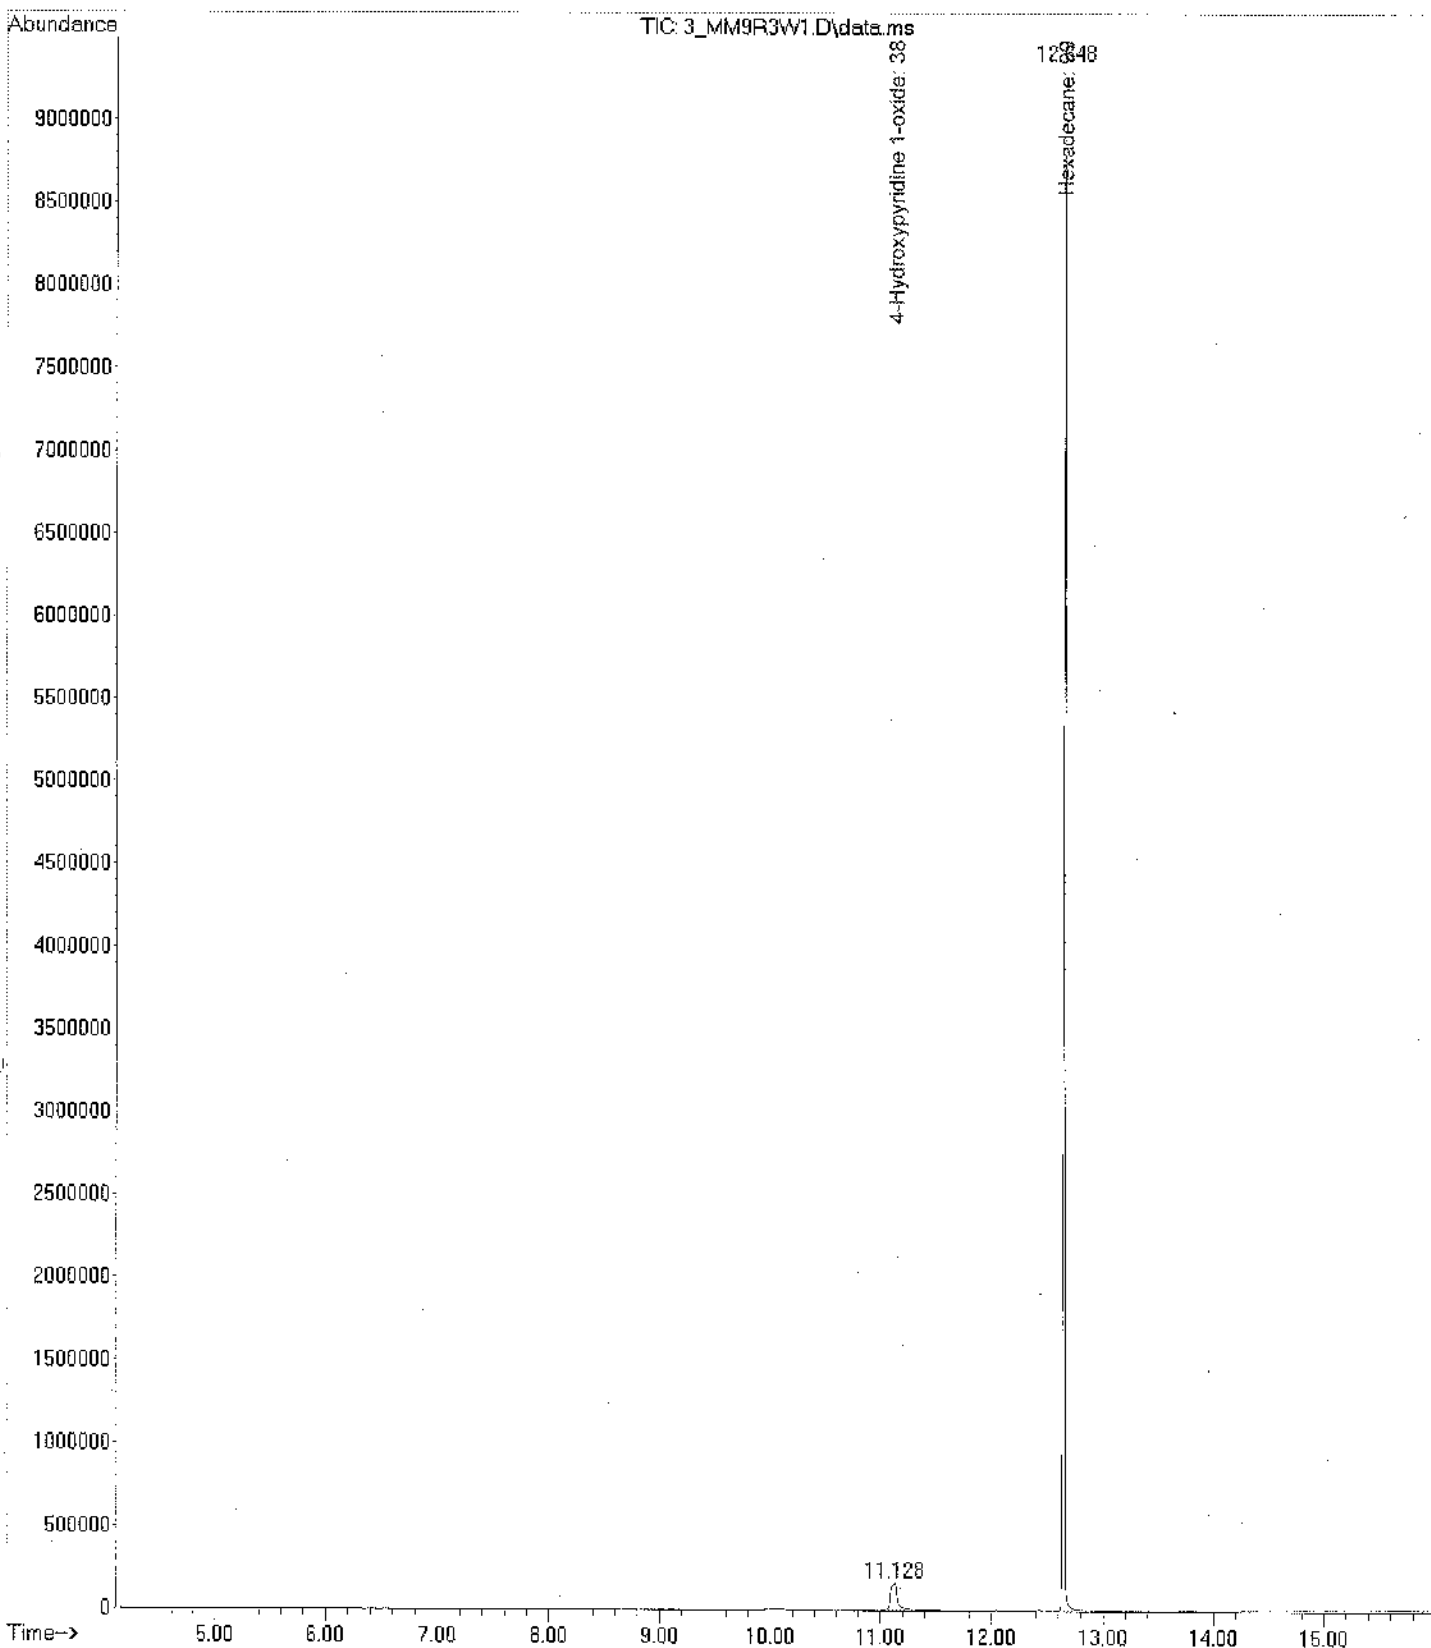

Area Percent Report

Data Path : C:\msdchem\1\data\Madushika\  
 Data File : 3\_MM9R3W1.D  
 Acq On : 11 May 2016 11:01  
 Operator :  
 Sample : 3\_MM9R3W1  
 Misc :  
 ALS Vial : 3 Sample Multiplier: 1

Integration Parameters: autoint1.e  
 Integrator: ChemStation

Method : C:\msdchem\1\methods\Calibration plot\_Ace.M  
 Title : autoint1.e

Signal : TIC: 3\_MM9R3W1.D\data.ms

| peak # | R.T. min | first scan | max scan | last scan | PK TY | peak height | corr. area | corr. % max. | % of total |
|--------|----------|------------|----------|-----------|-------|-------------|------------|--------------|------------|
| 1      | 11.128   | 1165       | 1193     | 1223      | BB    | 158121      | 6553449    | 7.44%        | 6.927%     |
| 2      | 12.648   | 1434       | 1450     | 1479      | BB    | 8851422     | 88050400   | 100.00%      | 93.073%    |

Sum of corrected areas: 94603849

Calibration plot\_Ace.M Fri May 13 10:13:47 2016



File : C:\msdchem\1\data\Madushika\4\_MM9C1W1.D  
Operator :  
Acquired : 11 May 2016 11:22 using AcqMethod MADUSHIKA.M  
Instrument : UOSJP GCMSD  
Sample Name : 4\_MM9C1W1  
Misc Info : ERR  
Vial Number : 4

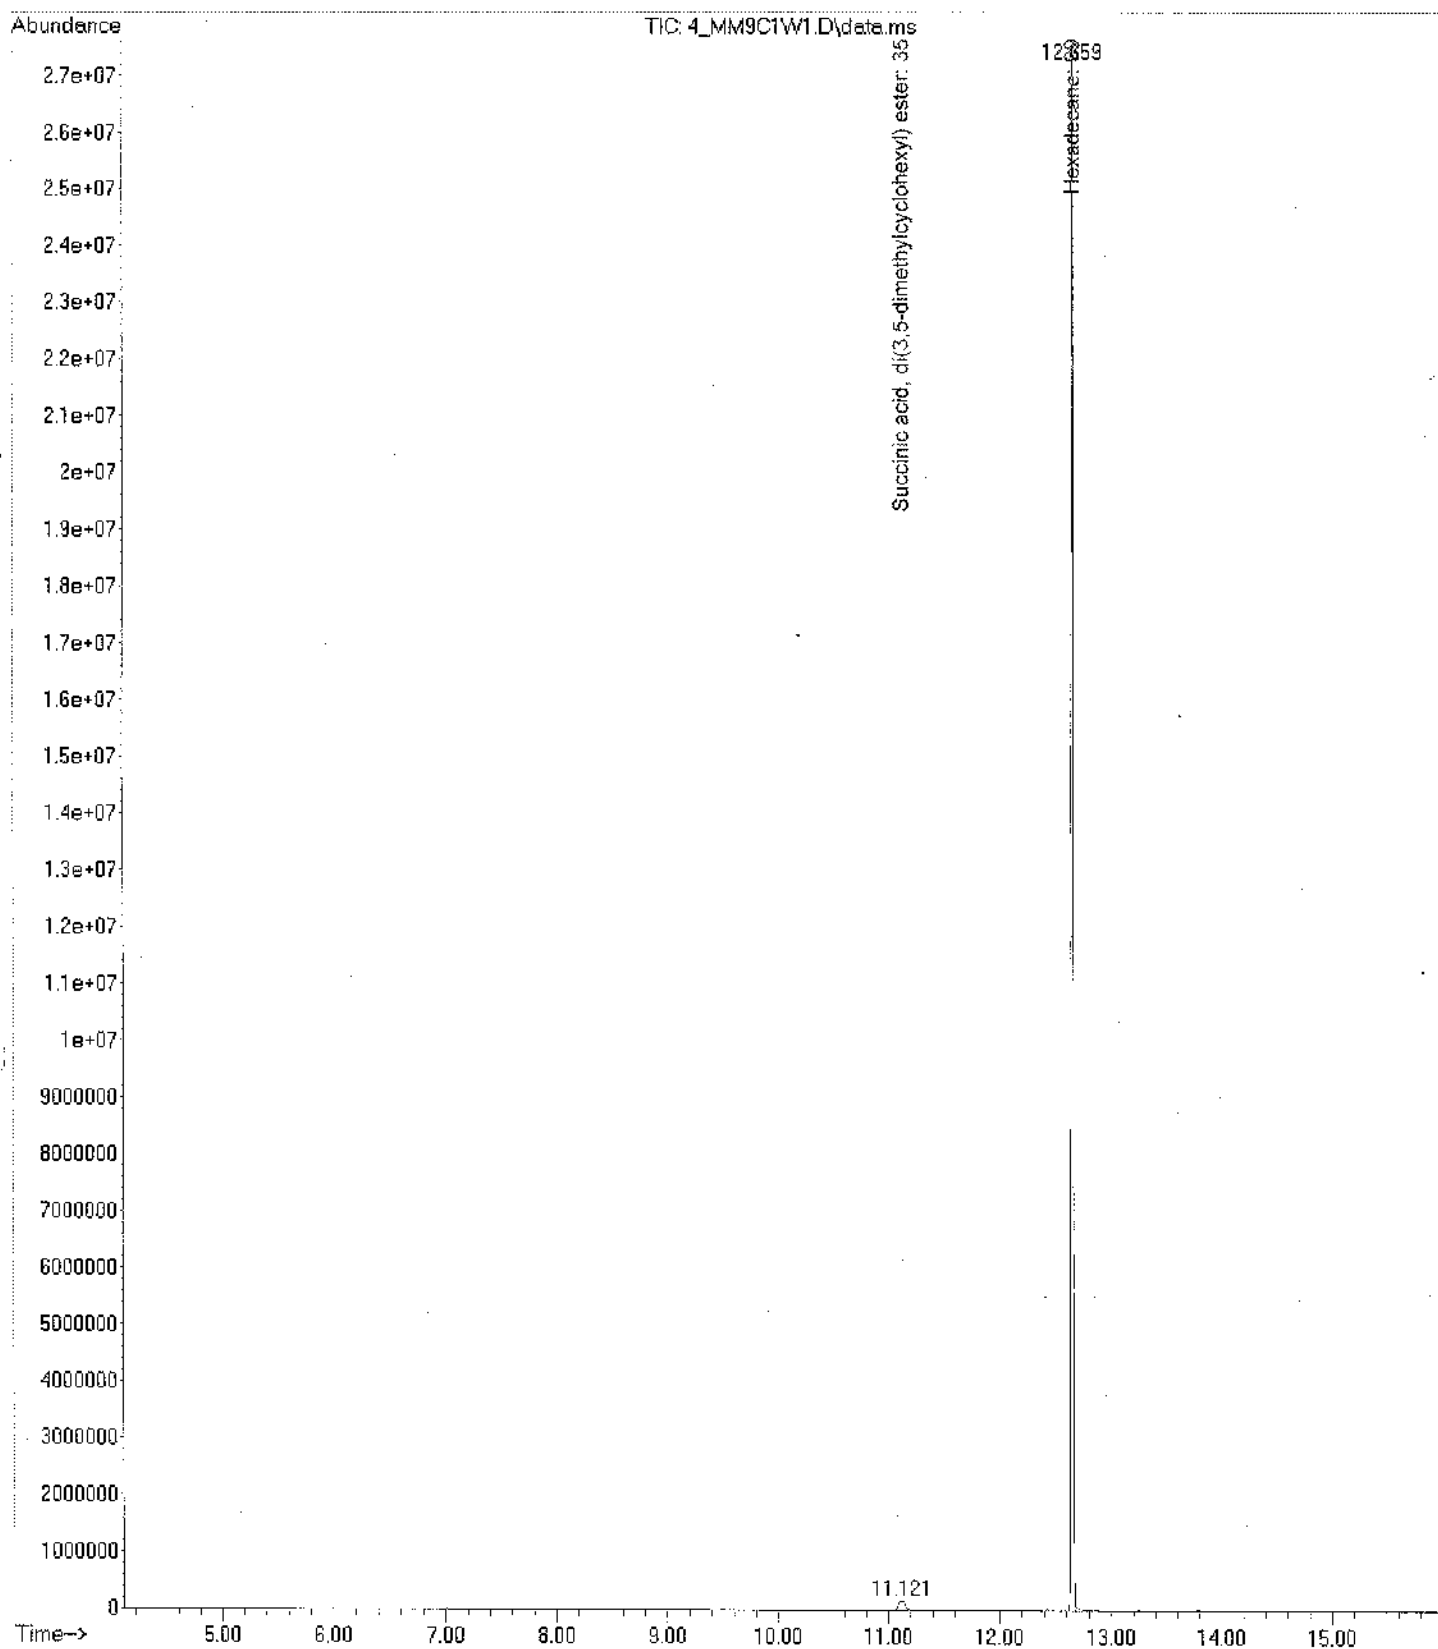

Area Percent Report

Data Path : C:\msdchem\1\data\Madushika\  
 Data File : 4\_MM9C1W1.D  
 Acq On : 11 May 2016 11:22  
 Operator :  
 Sample : 4\_MM9C1W1  
 Misc :  
 ALS Vial : 4 Sample Multiplier: 1

Integration Parameters: autoint1.e  
 Integrator: ChemStation

Method : C:\msdchem\1\methods\Calibration plot\_Ace.M  
 Title : autoint1.e

Signal : TIC: 4\_MM9C1W1.D\data.ms

| peak # | R.T. min | first scan | max scan | last scan | PK TY | peak height | corr. area | corr. % max. | % of total |
|--------|----------|------------|----------|-----------|-------|-------------|------------|--------------|------------|
| 1      | 11.121   | 1168       | 1192     | 1220      | BB 2  | 153072      | 6780152    | 2.08%        | 2.042%     |
| 2      | 12.659   | 1407       | 1452     | 1483      | BB    | 25062144    | 325297152  | 100.00%      | 97.958%    |

Sum of corrected areas: 332077304

Calibration plot\_Ace.M Fri May 13 10:14:56 2016

File : C:\msdchem\1\data\Madushika\5\_MM9C2W1.D  
Operator :  
Acquired : 11 May 2016 11:43 using AcqMethod MADUSHIKA.M  
Instrument : UOSJP GCMSD  
Sample Name : 5\_MM9C2W1  
Misc Info : ERR  
Vial Number : 5

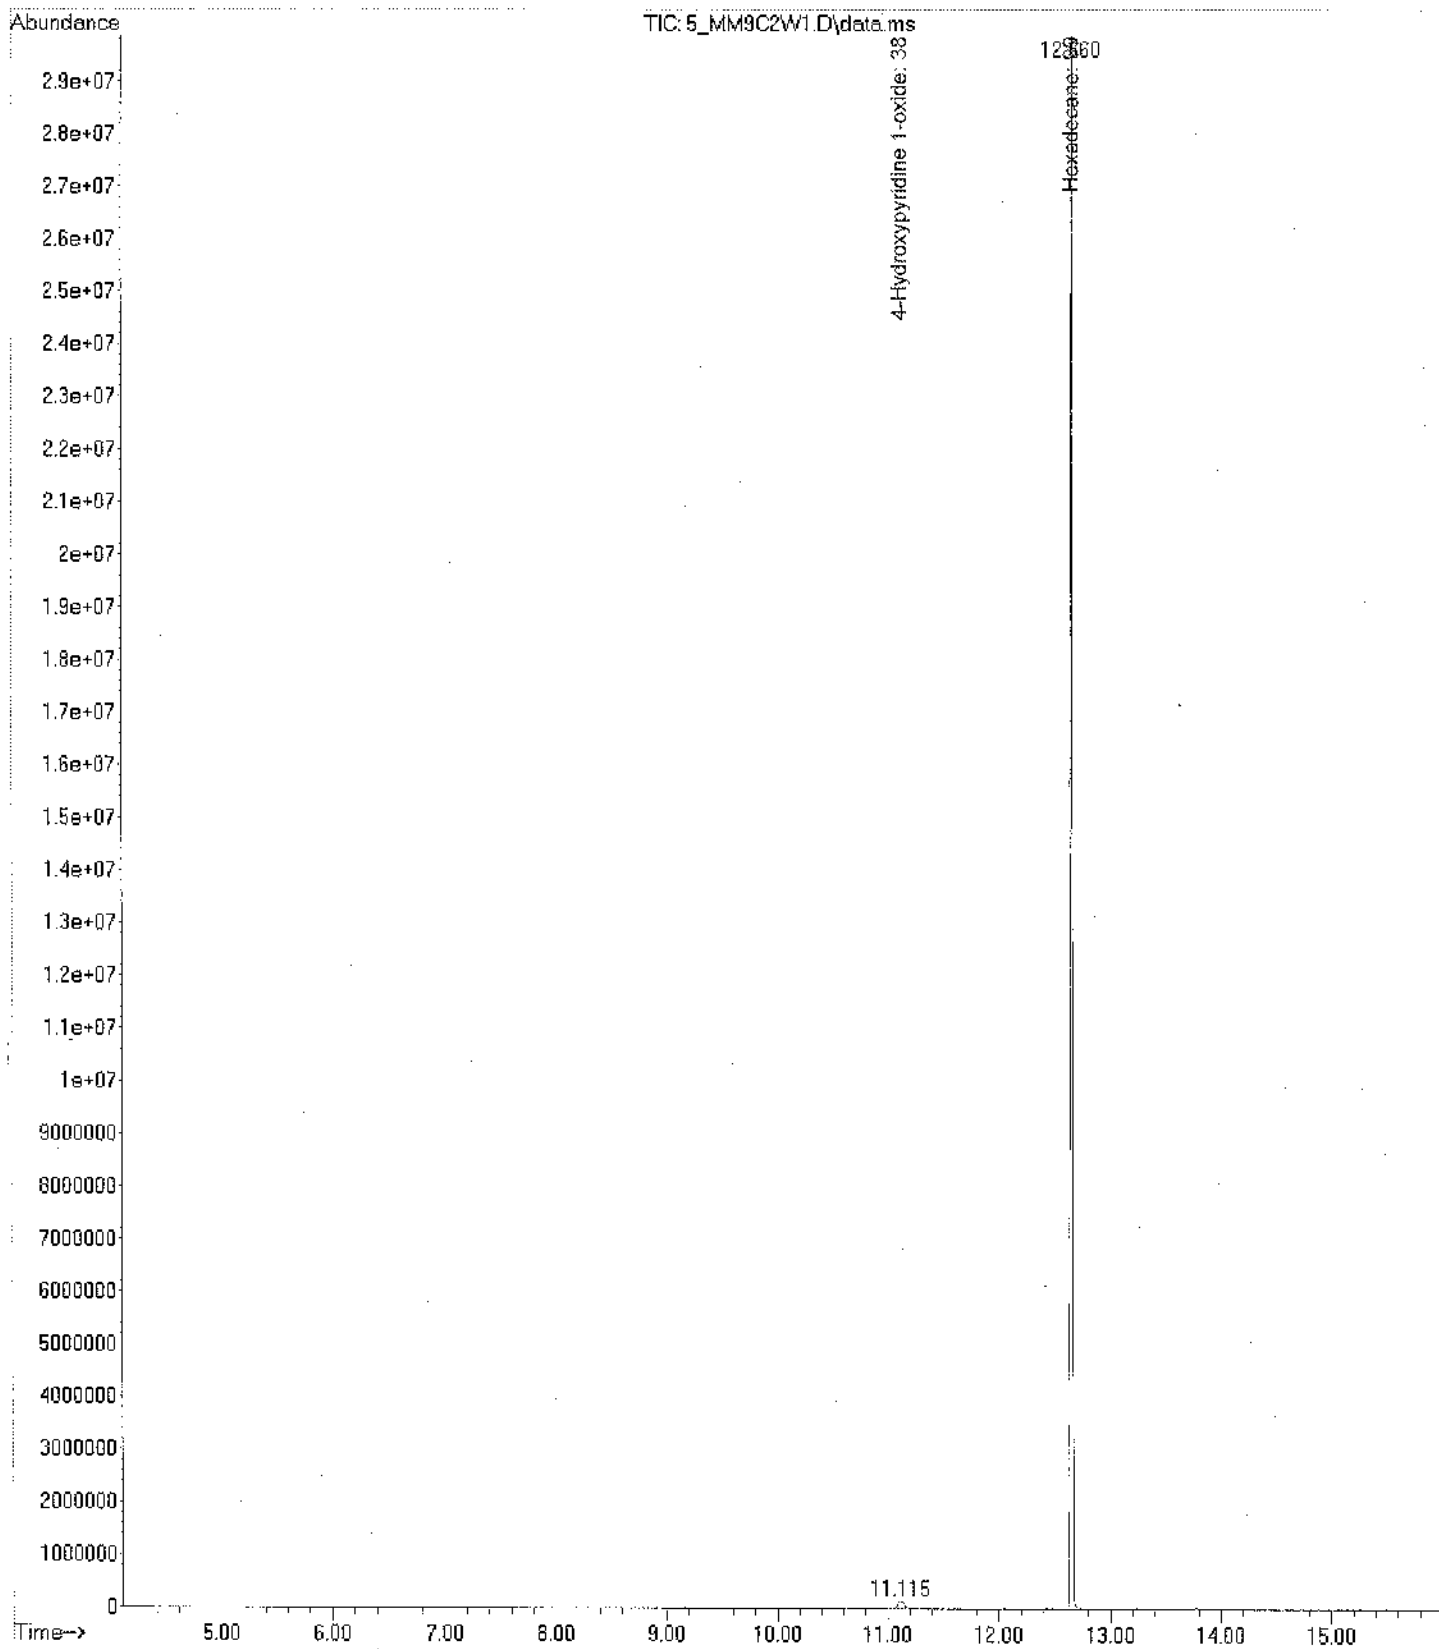

Area Percent Report

Data Path : C:\msdchem\1\data\Madushika\  
 Data File : 5\_MM9C2W1.D  
 Acq On : 11 May 2016 11:43  
 Operator :  
 Sample : 5\_MM9C2W1  
 Misc :  
 ALS Vial : 5 Sample Multiplier: 1

Integration Parameters: autoint1.e  
 Integrator: ChemStation

Method : C:\msdchem\1\methods\Calibration plot\_Ace.M  
 Title : autoint1.e

Signal : TIC: 5\_MM9C2W1.D\data.ms

| peak # | R.T. min | first scan | max scan | last scan | PK TY | peak height | corr. area | corr. % max. | % of total |
|--------|----------|------------|----------|-----------|-------|-------------|------------|--------------|------------|
| 1      | 11.115   | 1166       | 1191     | 1220      | BB 4  | 128240      | 5613659    | 1.46%        | 1.441%     |
| 2      | 12.660   | 1443       | 1452     | 1484      | BB    | 28027788    | 383958712  | 100.00%      | 98.559%    |

Sum of corrected areas: 389572371

Calibration plot\_Ace.M Fri May 13 10:16:02 2016

File : C:\msdchem\1\data\Madushika\6\_MM9C3W1.D  
Operator :  
Acquired : 11 May 2016 12:04 using AcqMethod MADUSHIKA.M  
Instrument : UOSJP GCMSD  
Sample Name : 6\_MM9C3W1  
Misc Info : ERR  
Vial Number : 6

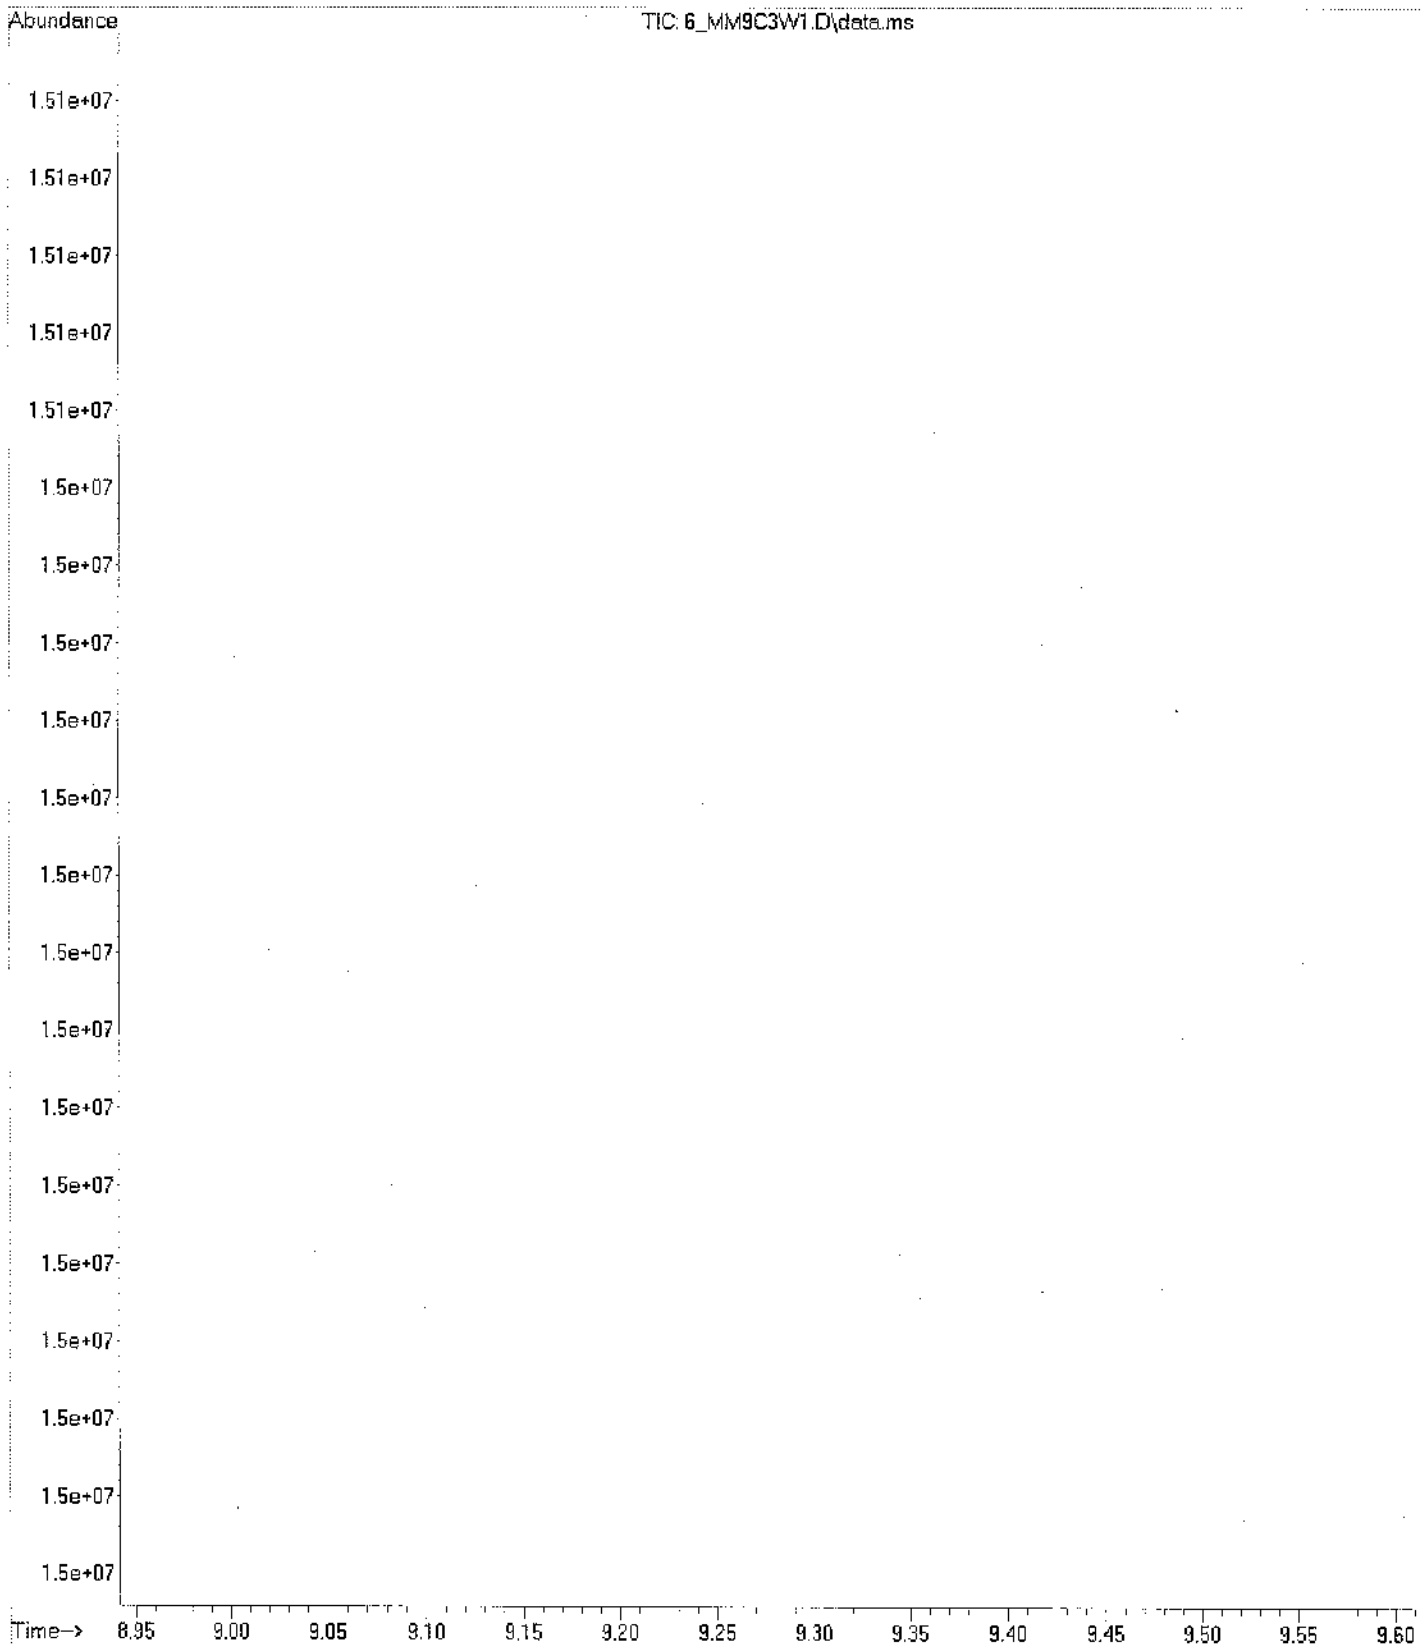

Area Percent Report

Data Path : C:\msdchem\1\data\Madushika\  
 Data File : 6\_MM9C3W1.D  
 Acq On : 11 May 2016 12:04  
 Operator :  
 Sample : 6\_MM9C3W1  
 Misc :  
 ALS Vial : 6 Sample Multiplier: 1

Integration Parameters: autoint1.e  
 Integrator: ChemStation

Method : C:\msdchem\1\methods\Calibration plot\_Ace.M  
 Title : autoint1.e

Signal : TIC: 6\_MM9C3W1.D\data.ms

| peak # | R.T. min | first scan | max scan | last scan | PK TY | peak height | corr. area | corr. % max. | % of total |
|--------|----------|------------|----------|-----------|-------|-------------|------------|--------------|------------|
| 1      | 11.117   | 1167       | 1191     | 1223      | BB 2  | 136449      | 6180675    | 1.88%        | 1.842%     |
| 2      | 12.659   | 1405       | 1452     | 1484      | BB    | 24621656    | 329326852  | 100.00%      | 98.158%    |

Sum of corrected areas: 335507526

Calibration plot\_Ace.M Fri May 13 10:16:44 2016

File : C:\msdchem\1\data\Madushika\1\_MM10R1W1.D  
Operator :  
Acquired : 13 May 2016 10:09 using AcqMethod MADUSHIKA.M  
Instrument : UOSJP GCMSD  
Sample Name : 1\_MM10R1W1  
Misc Info : ERR  
Vial Number : 1

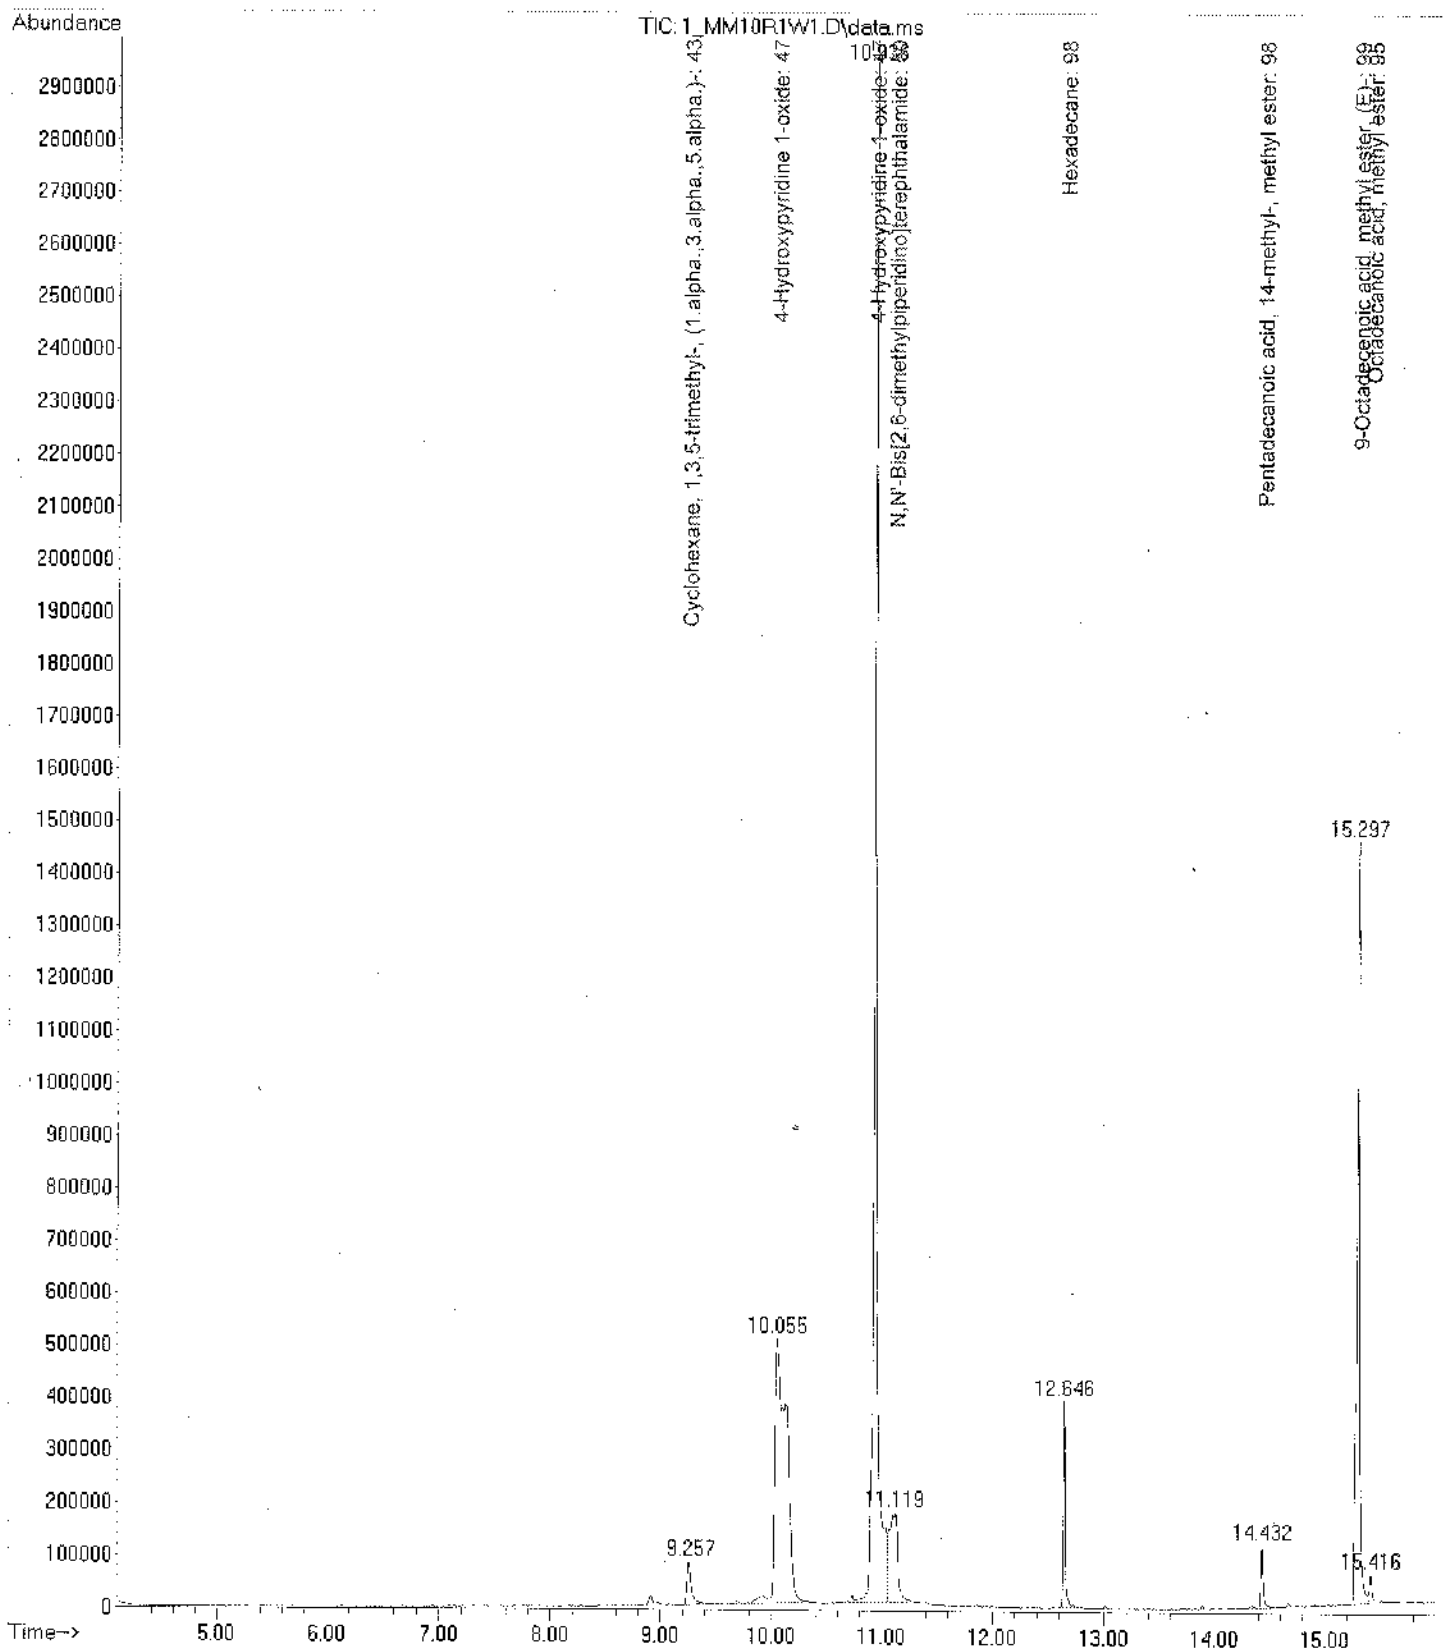

## Area Percent Report

Data Path : C:\msdchem\1\data\Madushika\  
Data File : 1\_MM10R1W1.D  
Acq On : 13 May 2016 10:09  
Operator :  
Sample : 1\_MM10R1W1  
Misc :  
ALS Vial : 1 Sample Multiplier: 1

Integration Parameters: autoint1.e  
Integrator: ChemStation

Method : C:\MSDCHEM\1\METHODS\SMART.M  
Title : autoint1.e

Signal : TIC: 1\_MM10R1W1.D\data.ms

| peak # | R.T. min | first scan | max scan | last scan | PK TY | peak height | corr. area | corr. % max. | % of total |
|--------|----------|------------|----------|-----------|-------|-------------|------------|--------------|------------|
| 1      | 9.257    | 867        | 876      | 901       | BB 2  | 81487       | 2251195    | 4.26%        | 1.678%     |
| 2      | 10.055   | 943        | 1011     | 1060      | BB    | 483168      | 36989306   | 69.98%       | 27.579%    |
| 3      | 10.936   | 1110       | 1160     | 1180      | BV    | 2855860     | 52859349   | 100.00%      | 39.411%    |
| 4      | 11.119   | 1180       | 1191     | 1220      | VB 3  | 161713      | 9691725    | 18.33%       | 7.226%     |
| 5      | 12.646   | 1444       | 1450     | 1469      | BB    | 354503      | 4462708    | 8.44%        | 3.327%     |
| 6      | 14.432   | 1727       | 1753     | 1773      | BB 2  | 112186      | 2005618    | 3.79%        | 1.495%     |
| 7      | 15.297   | 1869       | 1899     | 1915      | BV    | 1474410     | 24824851   | 46.96%       | 18.509%    |
| 8      | 15.416   | 1915       | 1919     | 1938      | VB    | 53886       | 1037106    | 1.96%        | 0.773%     |

Sum of corrected areas: 134121858

SMART.M Thu May 19 09:33:39 2016



P.T.O.

(Printing mistake)

( )

( )

Area Percent Report

Data Path : C:\msdchem\1\data\Madushika\  
 Data File : 2\_MM10R2W1.D  
 Acq On : 13 May 2016 10:31  
 Operator :  
 Sample : 2\_MM10R2W1  
 Misc :  
 ALS Vial : 2 Sample Multiplier: 1

Integration Parameters: autoint1.e  
 Integrator: ChemStation

Method : C:\MSDCHEM\1\METHODS\SMART.M  
 Title : autoint1.e

Signal : TIC: 2\_MM10R2W1.D\data.ms

| peak # | R.T. min | first scan | max scan | last scan | PK TY | peak height | corr. area | corr. % max. | % of total |
|--------|----------|------------|----------|-----------|-------|-------------|------------|--------------|------------|
| 1      | 11.124   | 1114       | 1192     | 1224      | BB 3  | 168499      | 8174127    | 100.00%      | 58.704%    |
| 2      | 12.646   | 1444       | 1450     | 1469      | BB    | 427677      | 5750275    | 70.35%       | 41.296%    |

Sum of corrected areas: 13924402

SMART.M Thu May 19 09:40:25 2016

File : C:\msdchem\1\data\Madushika\3\_MM10R3W1.D  
Operator :  
Acquired : 13 May 2016 10:52 using AcqMethod MADUSHIKA.M  
Instrument : UOSJP GCMSD  
Sample Name : 3\_MM10R3W1  
Misc Info : ERR  
Vial Number : 3

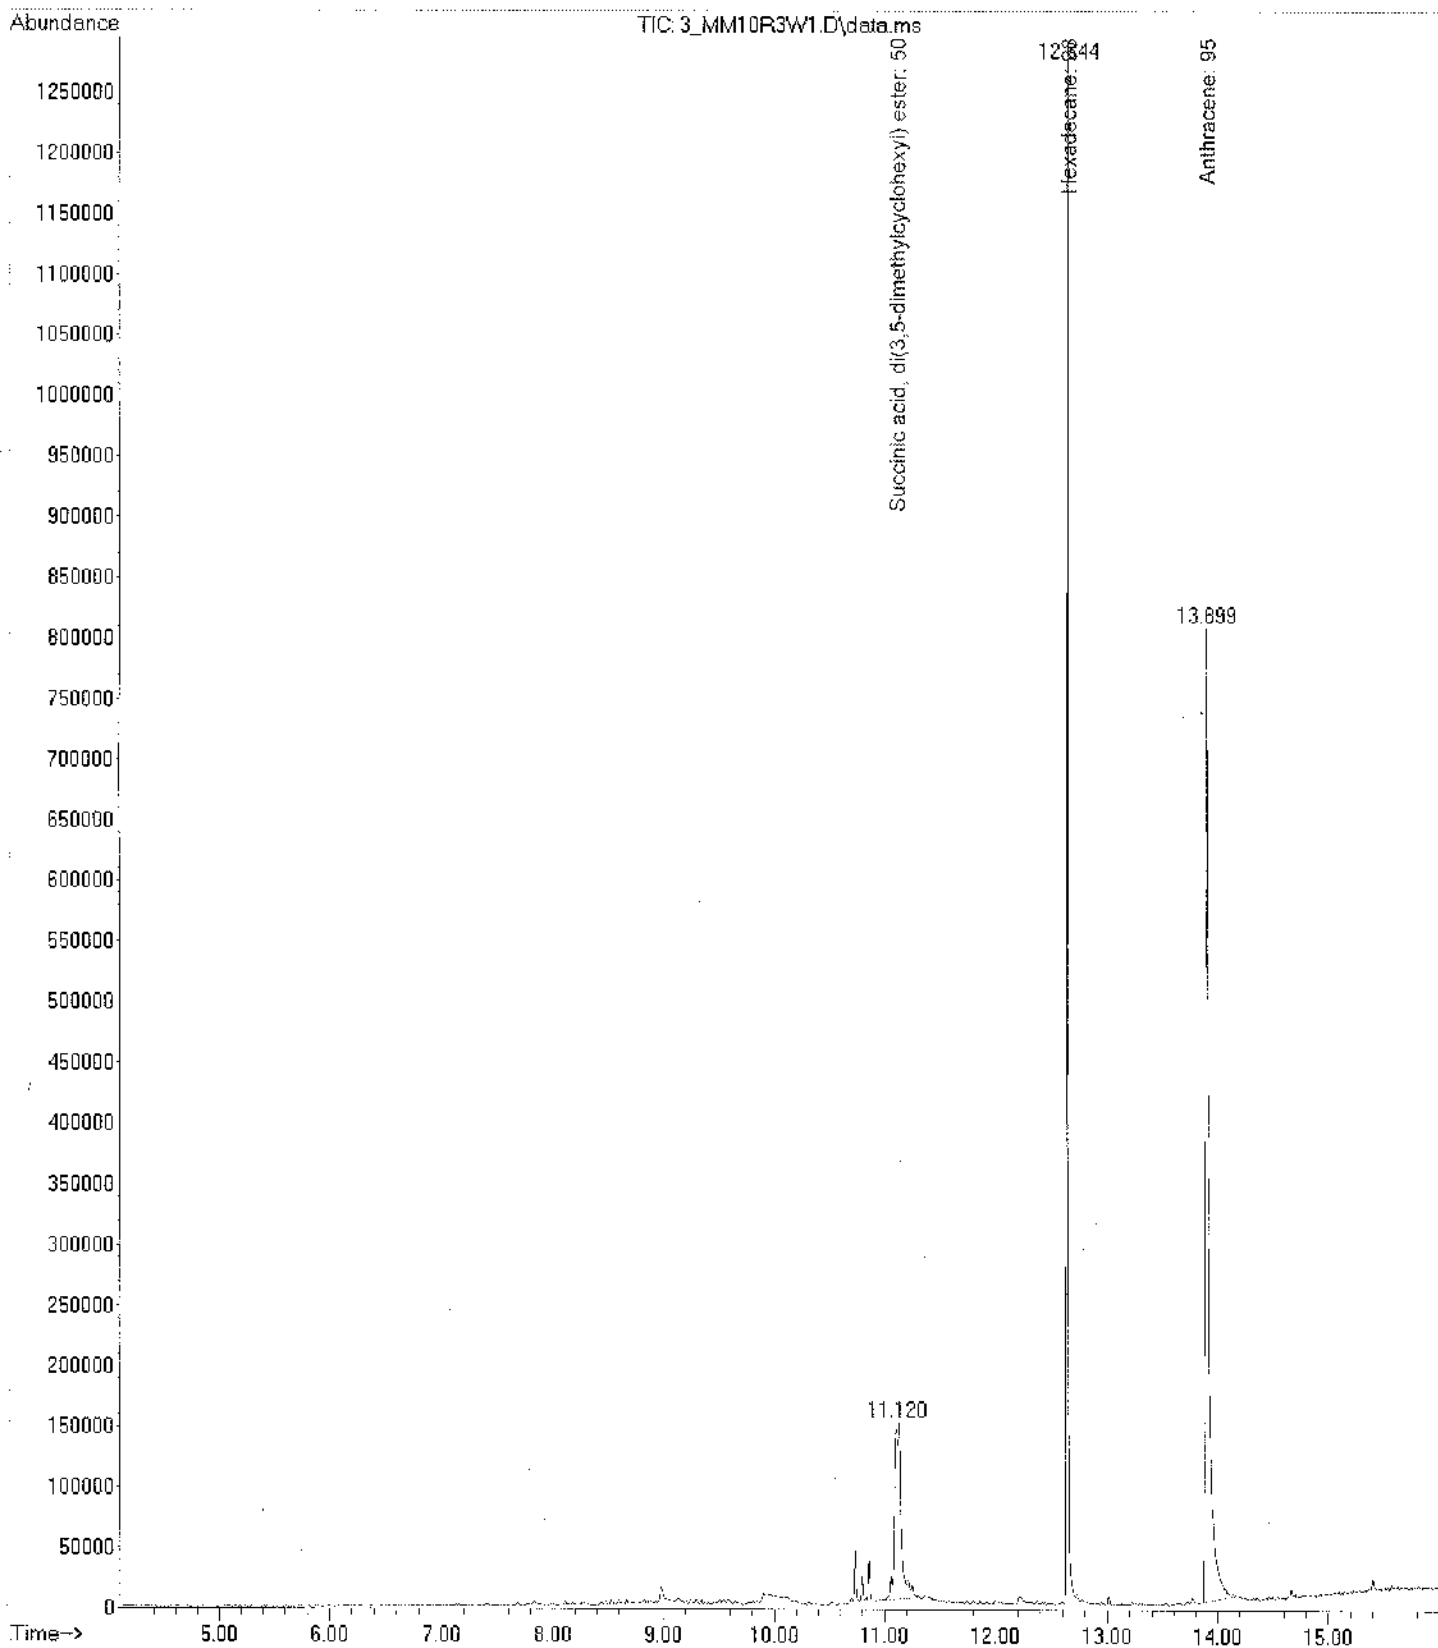

Area Percent Report

Data Path : C:\msdchem\1\data\Madushika\  
 Data File : 3\_MM10R3W1.D  
 Acq On : 13 May 2016 10:52  
 Operator :  
 Sample : 3\_MM10R3W1  
 Misc :  
 ALS Vial : 3 Sample Multiplier: 1

Integration Parameters: autoint1.e  
 Integrator: ChemStation

Method : C:\MSDCHEM\1\METHODS\SMART.M  
 Title : autoint1.e

Signal : TIC: 3\_MM10R3W1.D\data.ms

| peak # | R.T. min | first scan | max scan | last scan | PK TY | peak height | corr: area | corr. % max. | % of total |
|--------|----------|------------|----------|-----------|-------|-------------|------------|--------------|------------|
| 1      | 11.120   | 1170       | 1191     | 1224      | BB 2  | 129660      | 6167002    | 37.79%       | 17.569%    |
| 2      | 12.644   | 1443       | 1450     | 1475      | BB    | 1204960     | 12615778   | 77.31%       | 35.941%    |
| 3      | 13.899   | 1654       | 1662     | 1705      | BB    | 725566      | 16318855   | 100.00%      | 46.490%    |

Sum of corrected areas: 35101635

SMART.M Thu May 19 09:35:50 2016

File : C:\msdchem\1\data\Madushika\4\_MM10C1W1.D  
Operator :  
Acquired : 13 May 2016 11:13 using AcqMethod MADUSHIKA.M  
Instrument : UOSJP GCMSD  
Sample Name : 4\_MM10C1W1  
Misc Info : ERR  
Vial Number : 4

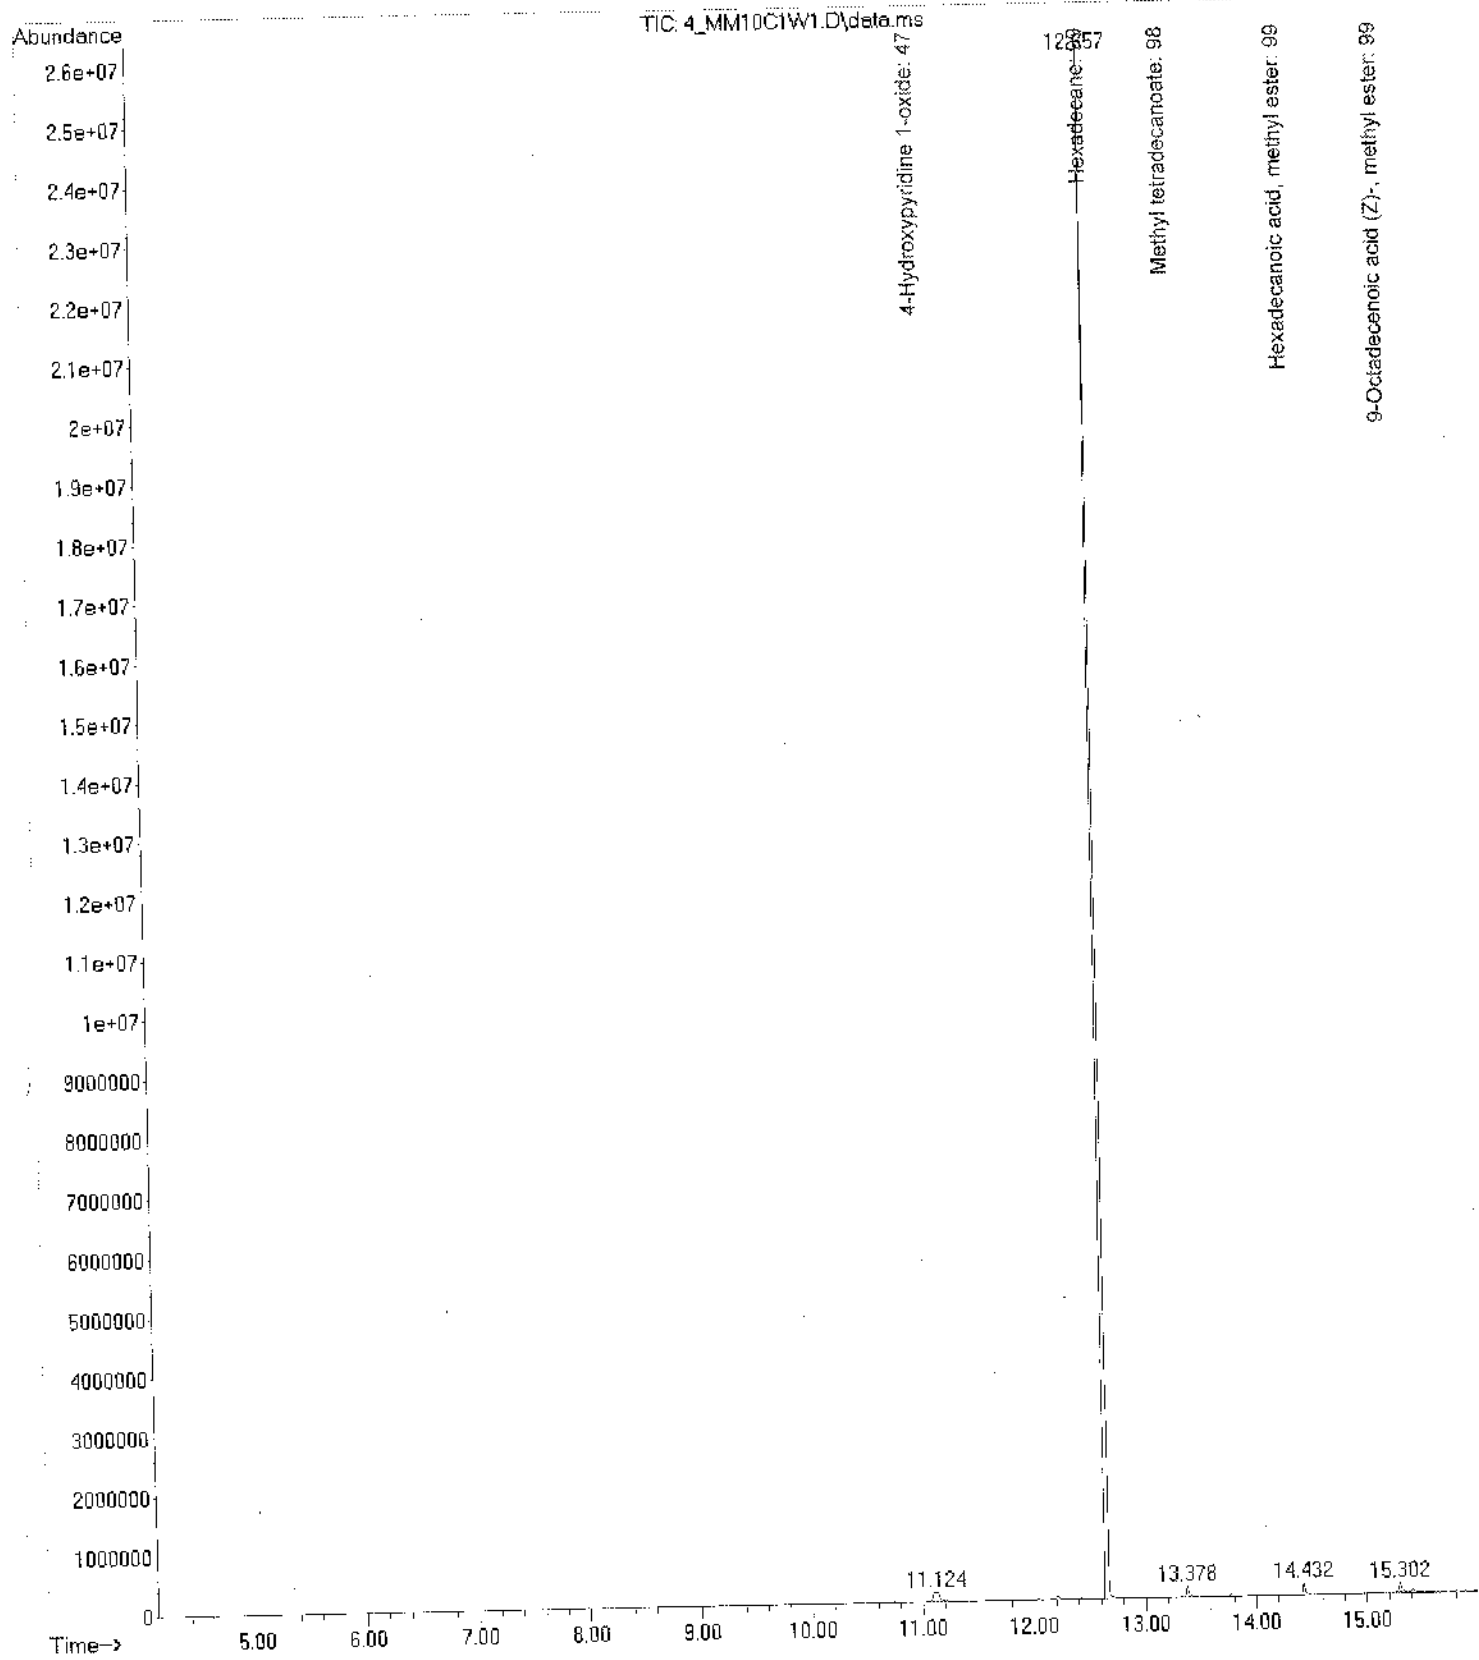

Area Percent Report

Data Path : C:\msdchem\1\data\Madushika\  
 Data File : 4\_MM10C1W1.D  
 Acq On : 13 May 2016 11:13  
 Operator :  
 Sample : 4\_MM10C1W1  
 Misc :  
 ALS Vial : 4 Sample Multiplier: 1

Integration Parameters: autoint1.e  
 Integrator: ChemStation

Method : C:\MSDCHEM\1\METHODS\SMART.M  
 Title : autoint1.e

Signal : TIC: 4\_MM10C1W1.D\data.ms

| peak # | R.T. min | first scan | max scan | last scan | PK TY | peak height | corr. area | corr. % max. | % of total |
|--------|----------|------------|----------|-----------|-------|-------------|------------|--------------|------------|
| 1      | 11.124   | 1165       | 1192     | 1221      | BB 3  | 150610      | 6611406    | 2.17%        | 2.064%     |
| 2      | 12.657   | 1439       | 1452     | 1479      | BB    | 24335899    | 305060172  | 100.00%      | 95.219%    |
| 3      | 13.378   | 1566       | 1574     | 1593      | BB    | 173119      | 2953665    | 0.97%        | 0.922%     |
| 4      | 14.432   | 1743       | 1752     | 1772      | BB    | 185765      | 2944653    | 0.97%        | 0.919%     |
| 5      | 15.302   | 1876       | 1900     | 1914      | BV 2  | 146439      | 2805841    | 0.92%        | 0.876%     |

Sum of corrected areas: 320375737

SMART.M Thu May 19 09:36:34 2016

File : C:\msdchem\1\data\Madushika\5\_MM10C2W1.D  
Operator :  
Acquired : 13 May 2016 11:34 using AcqMethod MADUSHIKA.M  
Instrument : UOSJP GCMSD  
Sample Name: 5\_MM10C2W1  
Misc Info : ERR  
Vial Number: 5

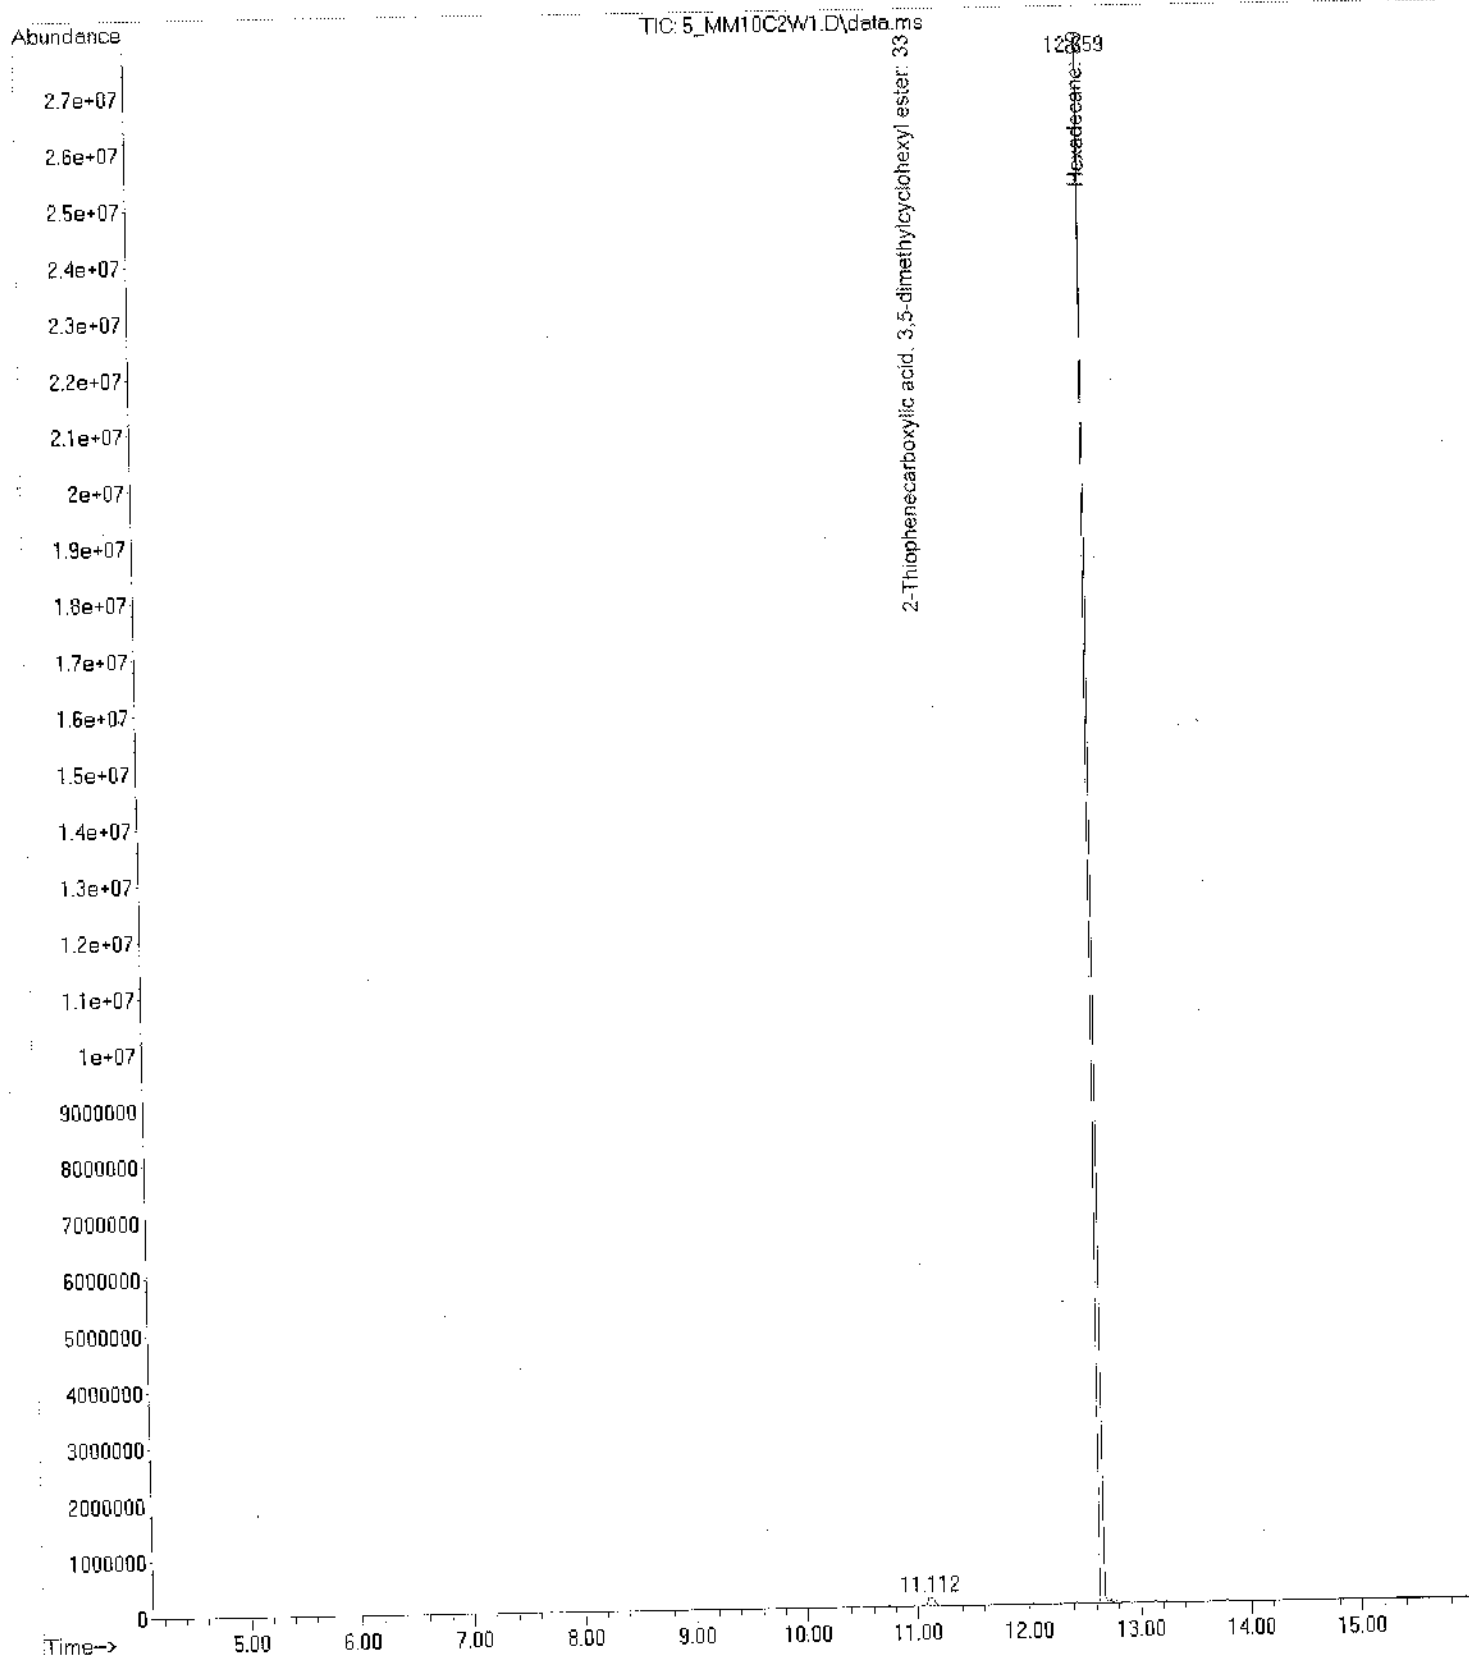

Area Percent Report

Data Path : C:\msdchem\1\data\Madushika\  
 Data File : 5\_MM10C2W1.D  
 Acq On : 13 May 2016 11:34  
 Operator :  
 Sample : 5\_MM10C2W1  
 Misc :  
 ALS Vial : 5 Sample Multiplier: 1

Integration Parameters: autoint1.e  
 Integrator: ChemStation

Method : C:\MSDCHEM\1\METHODS\SMART.M  
 Title : autoint1.e

Signal : TIC: 5\_MM10C2W1.D\data.ms

| peak # | R.T. min | first scan | max scan | last scan | PK TY | peak height | corr. area | corr. % max. | % of total |
|--------|----------|------------|----------|-----------|-------|-------------|------------|--------------|------------|
| 1      | 11.112   | 1166       | 1190     | 1220      | BB    | 145938      | 6370194    | 1.94%        | 1.906%     |
| 2      | 12.659   | 1443       | 1452     | 1469      | BV    | 25533244    | 327778543  | 100.00%      | 98.094%    |

Sum of corrected areas: 334148737

SMART.M Thu May 19 09:37:05 2016



File : C:\msdchem\1\data\Madushika\6\_MM10C3W1.D  
Operator :  
Acquired : 13 May 2016 11:55 using AcqMethod MADUSHIKA.M  
Instrument : UCSJP GCMSD  
Sample Name : 6\_MM10C3W1  
Misc Info :  
Vial Number : 6 ERR

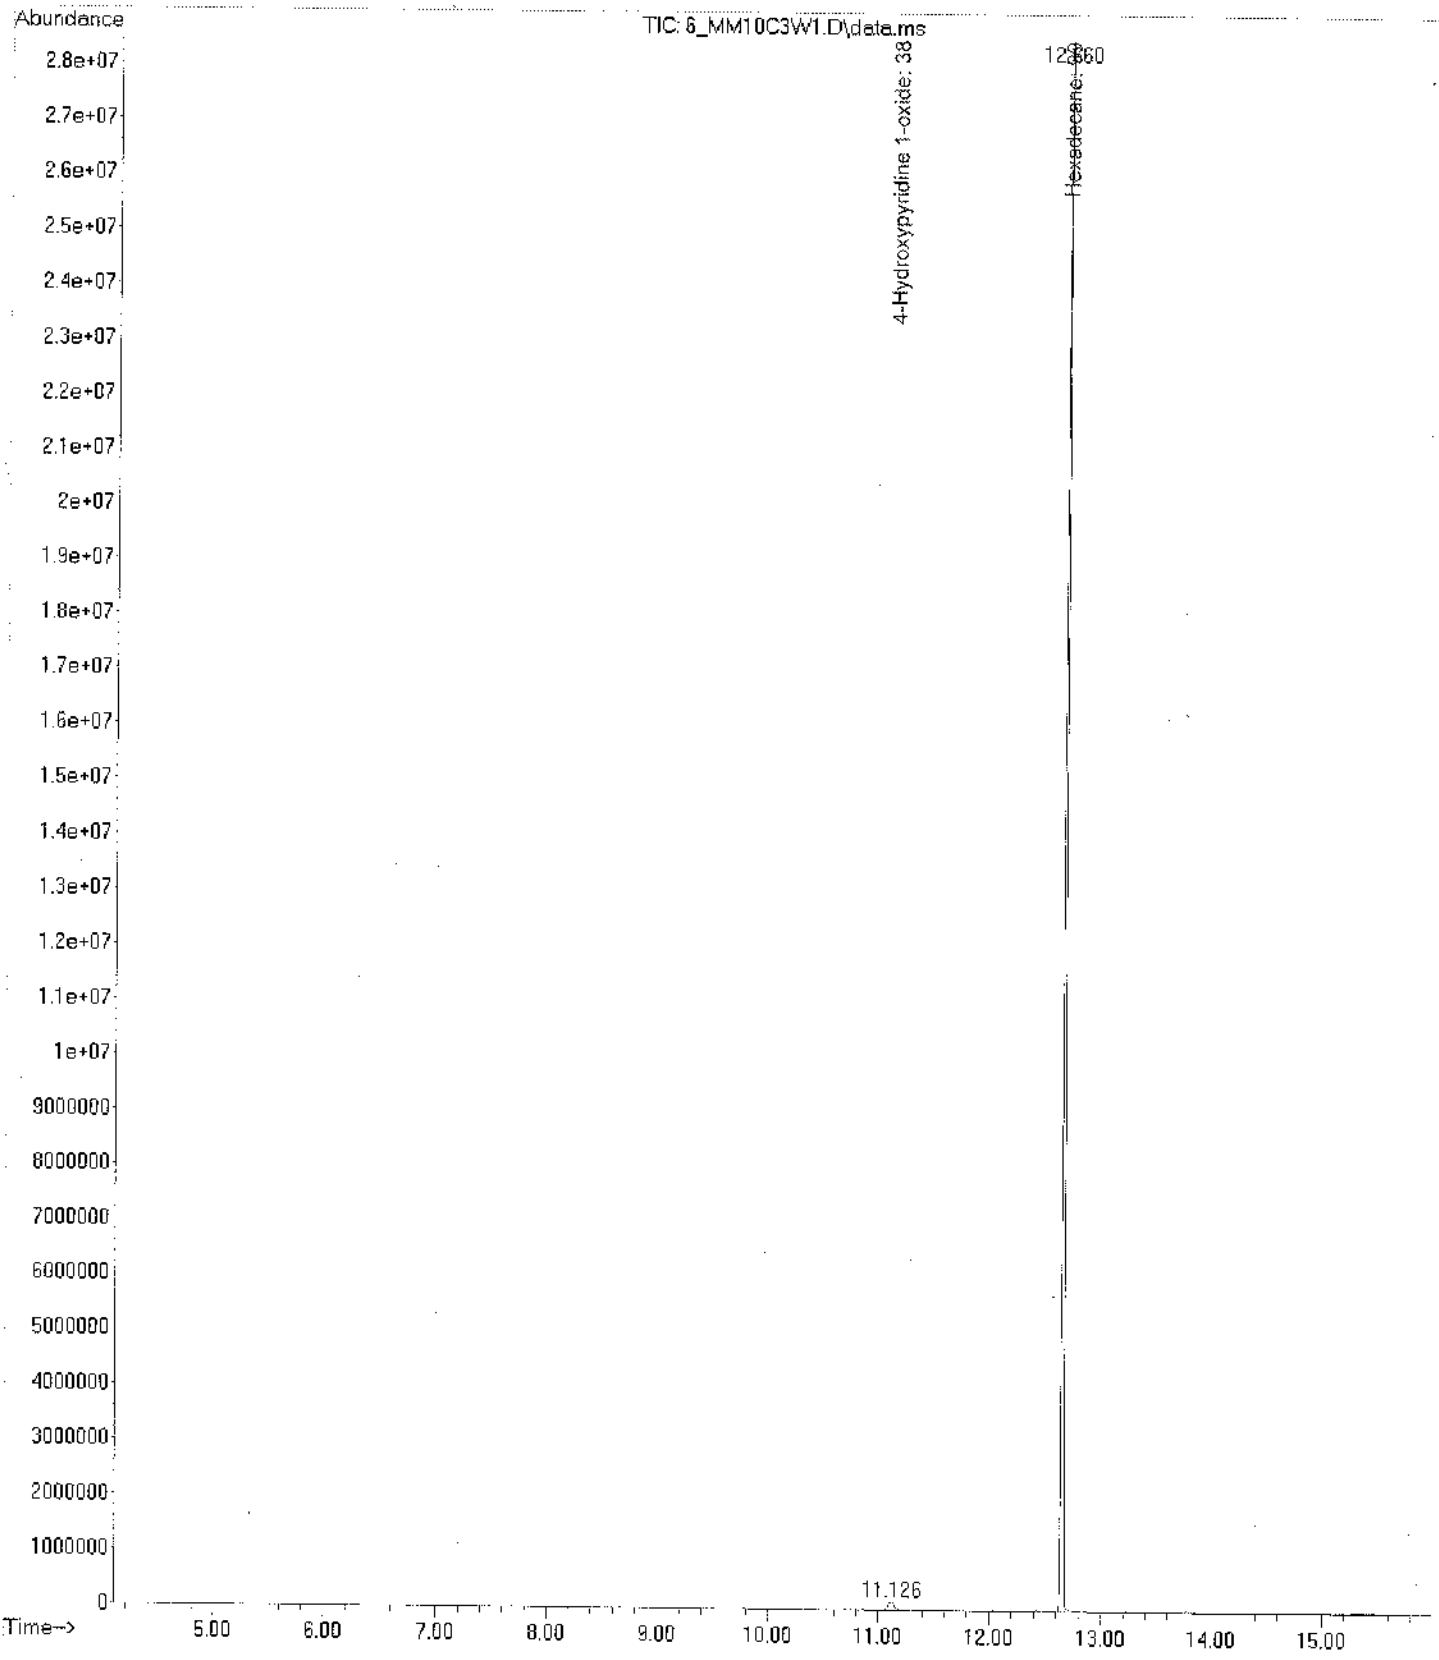

## Area Percent Report

Data Path : C:\msdchem\1\data\Madushika\  
Data File : 6\_MM10C3W1.D  
Acq On : 13 May 2016 11:55  
Operator :  
Sample : 6\_MM10C3W1  
Misc :  
ALS Vial : 6 Sample Multiplier: 1

Integration Parameters: autoint1.e  
Integrator: ChemStation

Method : C:\MSDCHEM\1\METHODS\SMART.M  
Title : autoint1.e

Signal : TIC: 6\_MM10C3W1.D\data.ms

| peak # | R.T. min | first scan | max scan | last scan | PK TY | peak height | corr. area | corr. % max. | % of total |
|--------|----------|------------|----------|-----------|-------|-------------|------------|--------------|------------|
| 1      | 11.126   | 1165       | 1192     | 1222      | BB 2  | 128652      | 5801117    | 1.53%        | 1.504%     |
| 2      | 12.660   | 1443       | 1452     | 1481      | BB    | 26362274    | 379891099  | 100.00%      | 98.496%    |

Sum of corrected areas: 385692217

SMART.M Thu May 19 09:38:53 2016

File : C:\msdchem\1\data\Madushika\1\_CR1W1.D  
Operator :  
Acquired : 10 Jun 2016 9:52 using AcqMethod MADUSHIKA.M  
Instrument : UOSJP GCMSD  
Sample Name: 1\_CR1W1  
Misc Info : ERR  
Vial Number: 1

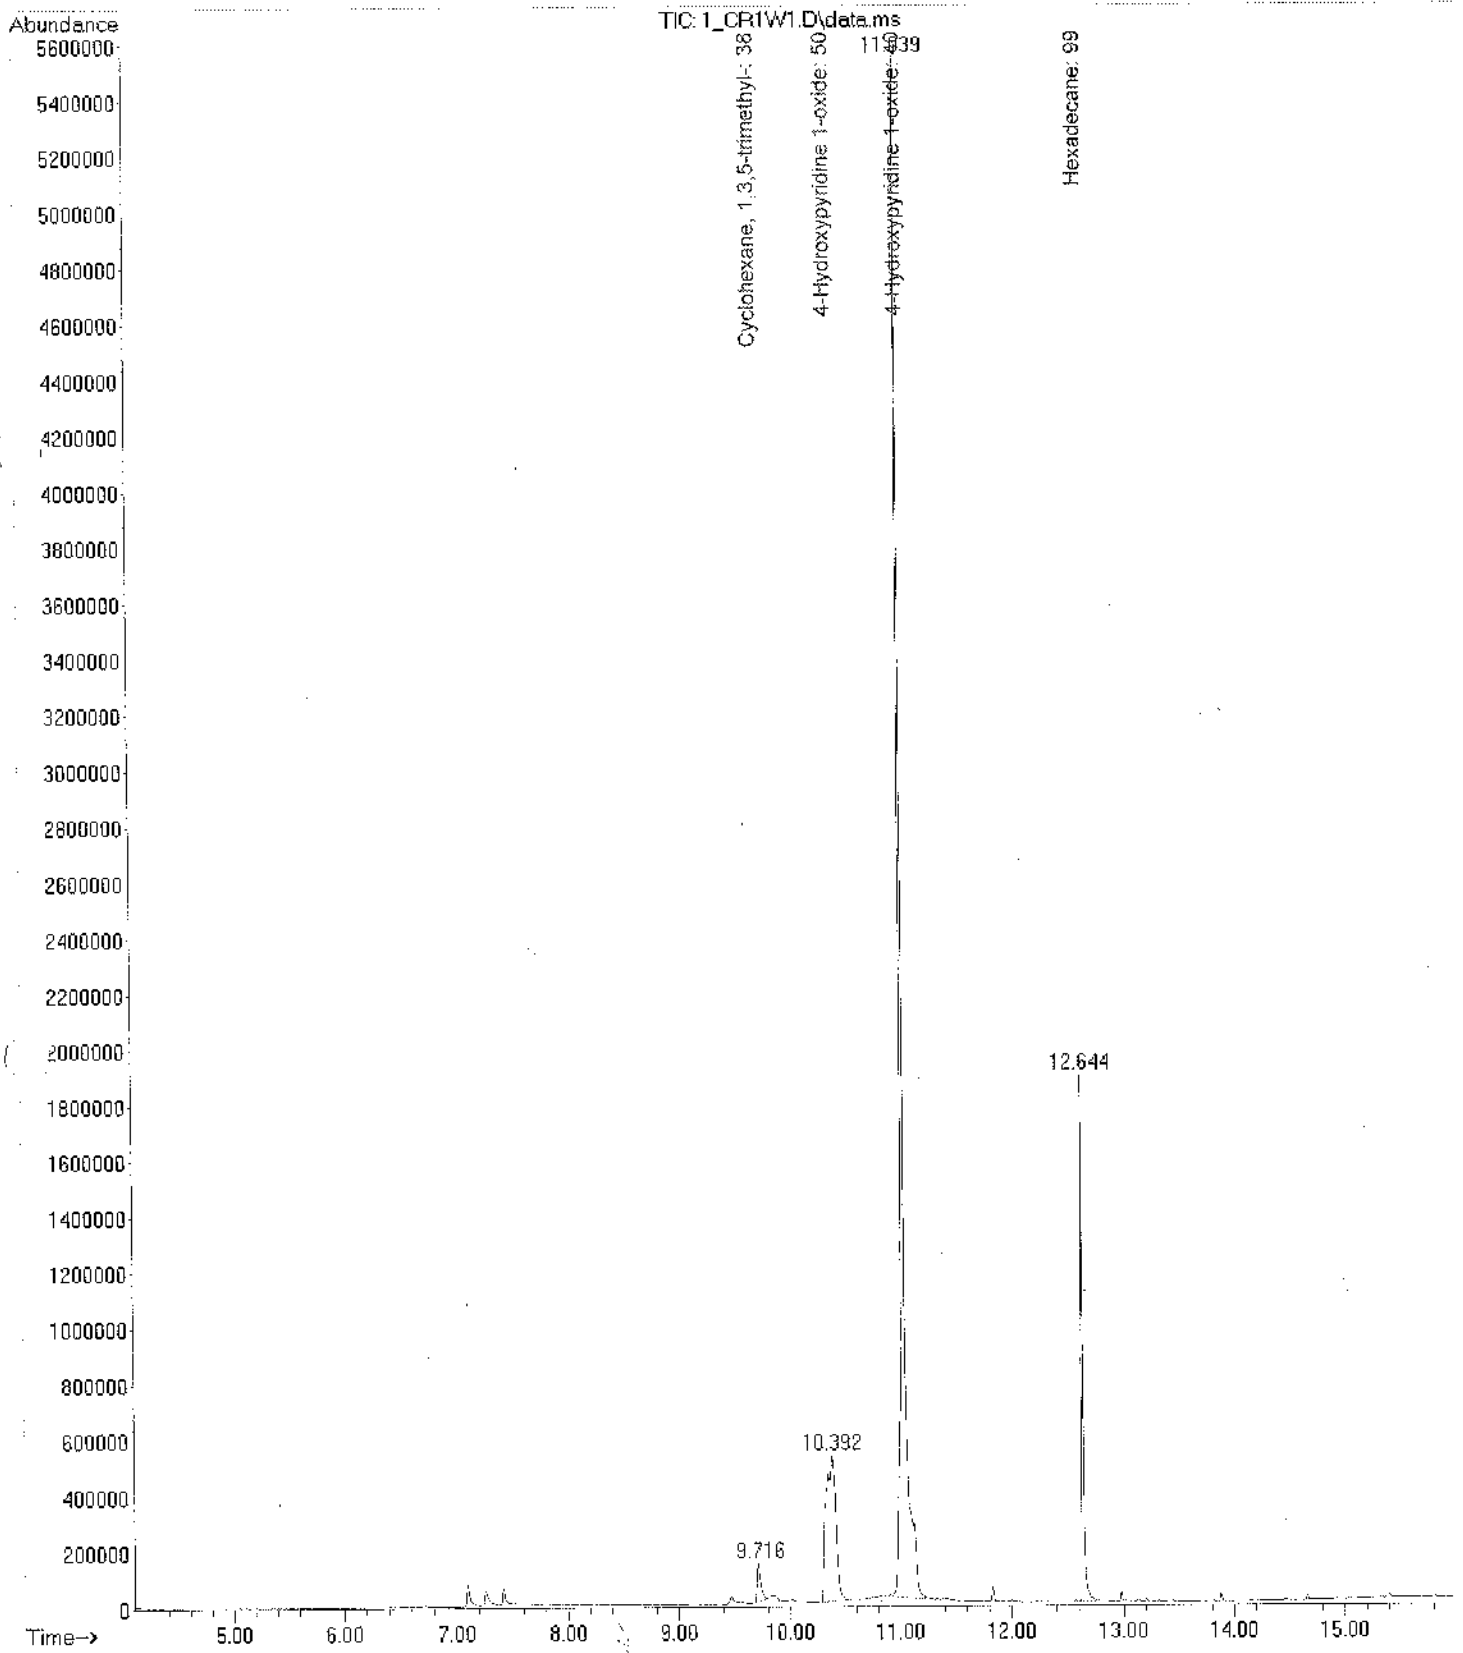

Area Percent Report

Data Path : C:\msdchem\1\data\Madushika\  
 Data File : 1\_CR1W1.D  
 Acq On : 10 Jun 2016 9:52  
 Operator :  
 Sample : 1\_CR1W1  
 Misc :  
 ALS Vial : 1 Sample Multiplier: 1

Integration Parameters: autoint1.e  
 Integrator: ChemStation

Method : C:\msdchem\1\methods\Calibration plot\_Ace.M  
 Title : autoint1.e

Signal : TIC: 1\_CR1W1.D\data.ms

| Peak # | R.T. min | first scan | max scan | last scan | PK TY | peak height | corr. area | corr. % max. | % of total |
|--------|----------|------------|----------|-----------|-------|-------------|------------|--------------|------------|
| 1      | 9.716    | 945        | 954      | 965       | BV 2  | 129567      | 3060605    | 3.07%        | 1.980%     |
| 2      | 10.392   | 1046       | 1068     | 1090      | BB    | 520077      | 32490914   | 32.63%       | 21.018%    |
| 3      | 11.039   | 1144       | 1178     | 1224      | BB    | 5124962     | 99588600   | 100.00%      | 64.422%    |
| 4      | 12.644   | 1441       | 1450     | 1475      | BB    | 1742704     | 19448052   | 19.53%       | 12.581%    |

Sum of corrected areas: 154588170

Calibration plot\_Ace.M Mon Jun 13 09:56:33 2016

MMIFungi R2

File : C:\msdchem\1\data\Madushika\2\_CR2W1.D  
Operator :  
Acquired : 10 Jun 2016 10:13 using AcqMethod MADUSHIKA.M  
Instrument : UOSJP GCMSD  
Sample Name: 2\_CR2W1  
Misc Info : ERR  
Vial Number: 2

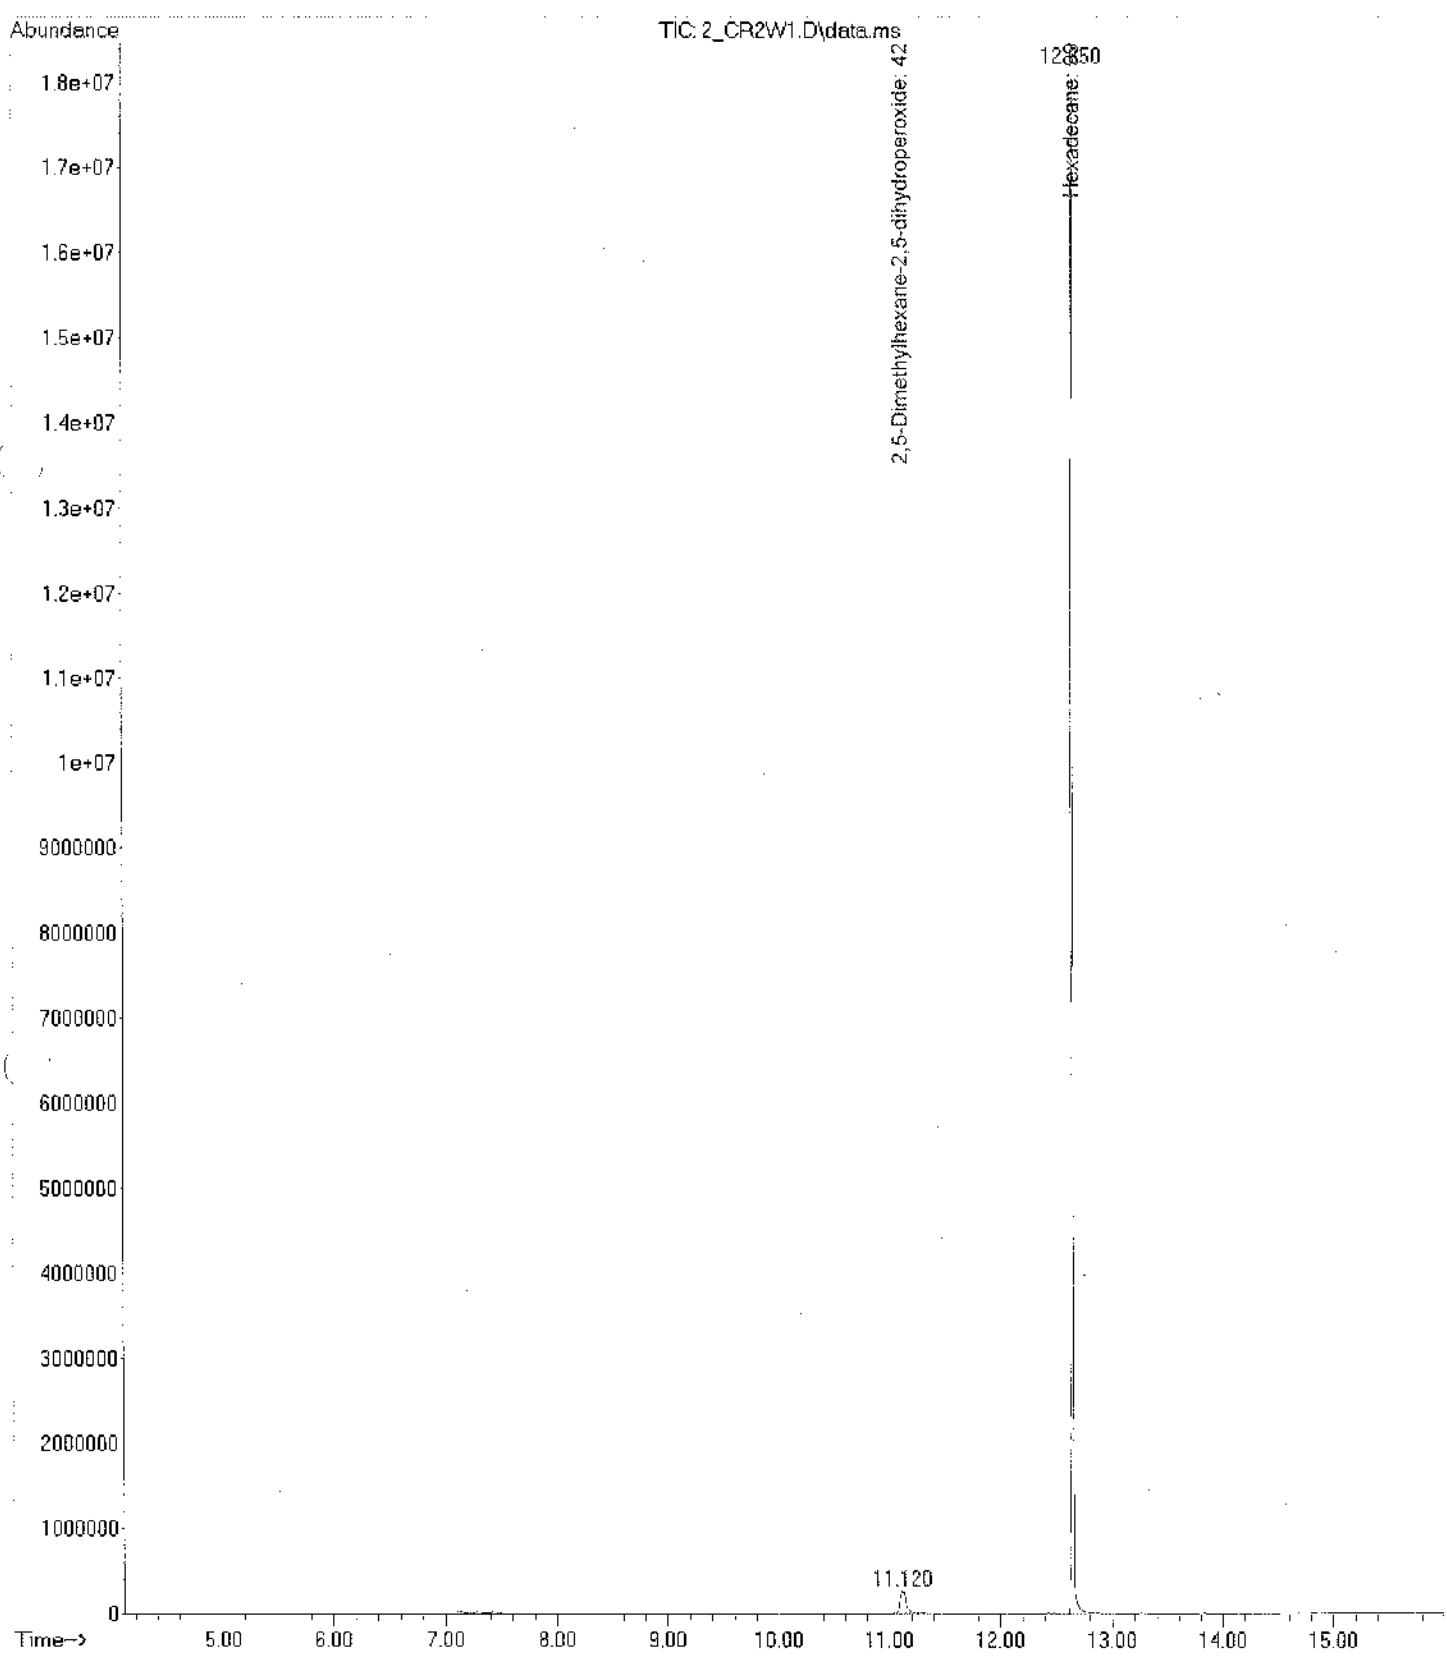

Area Percent Report

Data Path : C:\msdchem\1\data\Madushika\  
 Data File : 2\_CR2W1.D  
 Acq On : 10 Jun 2016 10:13  
 Operator :  
 Sample : 2\_CR2W1  
 Misc :  
 ALS Vial : 2 Sample Multiplier: 1

Integration Parameters: autoint1.e  
 Integrator: ChemStation

Method : C:\msdchem\1\methods\Calibration plot\_Ace.M  
 Title : autoint1.e

Signal : TIC: 2\_CR2W1.D\data.ms

| Peak # | R.T. min | first scan | max scan | last scan | PK TY | peak height | corr. area | corr. % max. | % of total |
|--------|----------|------------|----------|-----------|-------|-------------|------------|--------------|------------|
| 1      | 11.120   | 1169       | 1191     | 1217      | BB 4  | 242232      | 9898849    | 4.59%        | 4.388%     |
| 2      | 12.650   | 1433       | 1451     | 1484      | BB    | 18008167    | 215666831  | 100.00%      | 95.612%    |

Sum of corrected areas: 225565680

Calibration plot\_Ace.M Mon Jun 13 09:58:16 2016

MMIfungiR3 34

C = fungi of MM1

File : C:\msdchem\1\data\Madushika\3\_CR3W1.D  
Operator :  
Acquired : 10 Jun 2016 10:34 using AcqMethod MADUSHIKA.M  
Instrument : UOSJP GCMSD  
Sample Name : 3\_CR3W1  
Misc Info : ERR  
Vial Number : 3

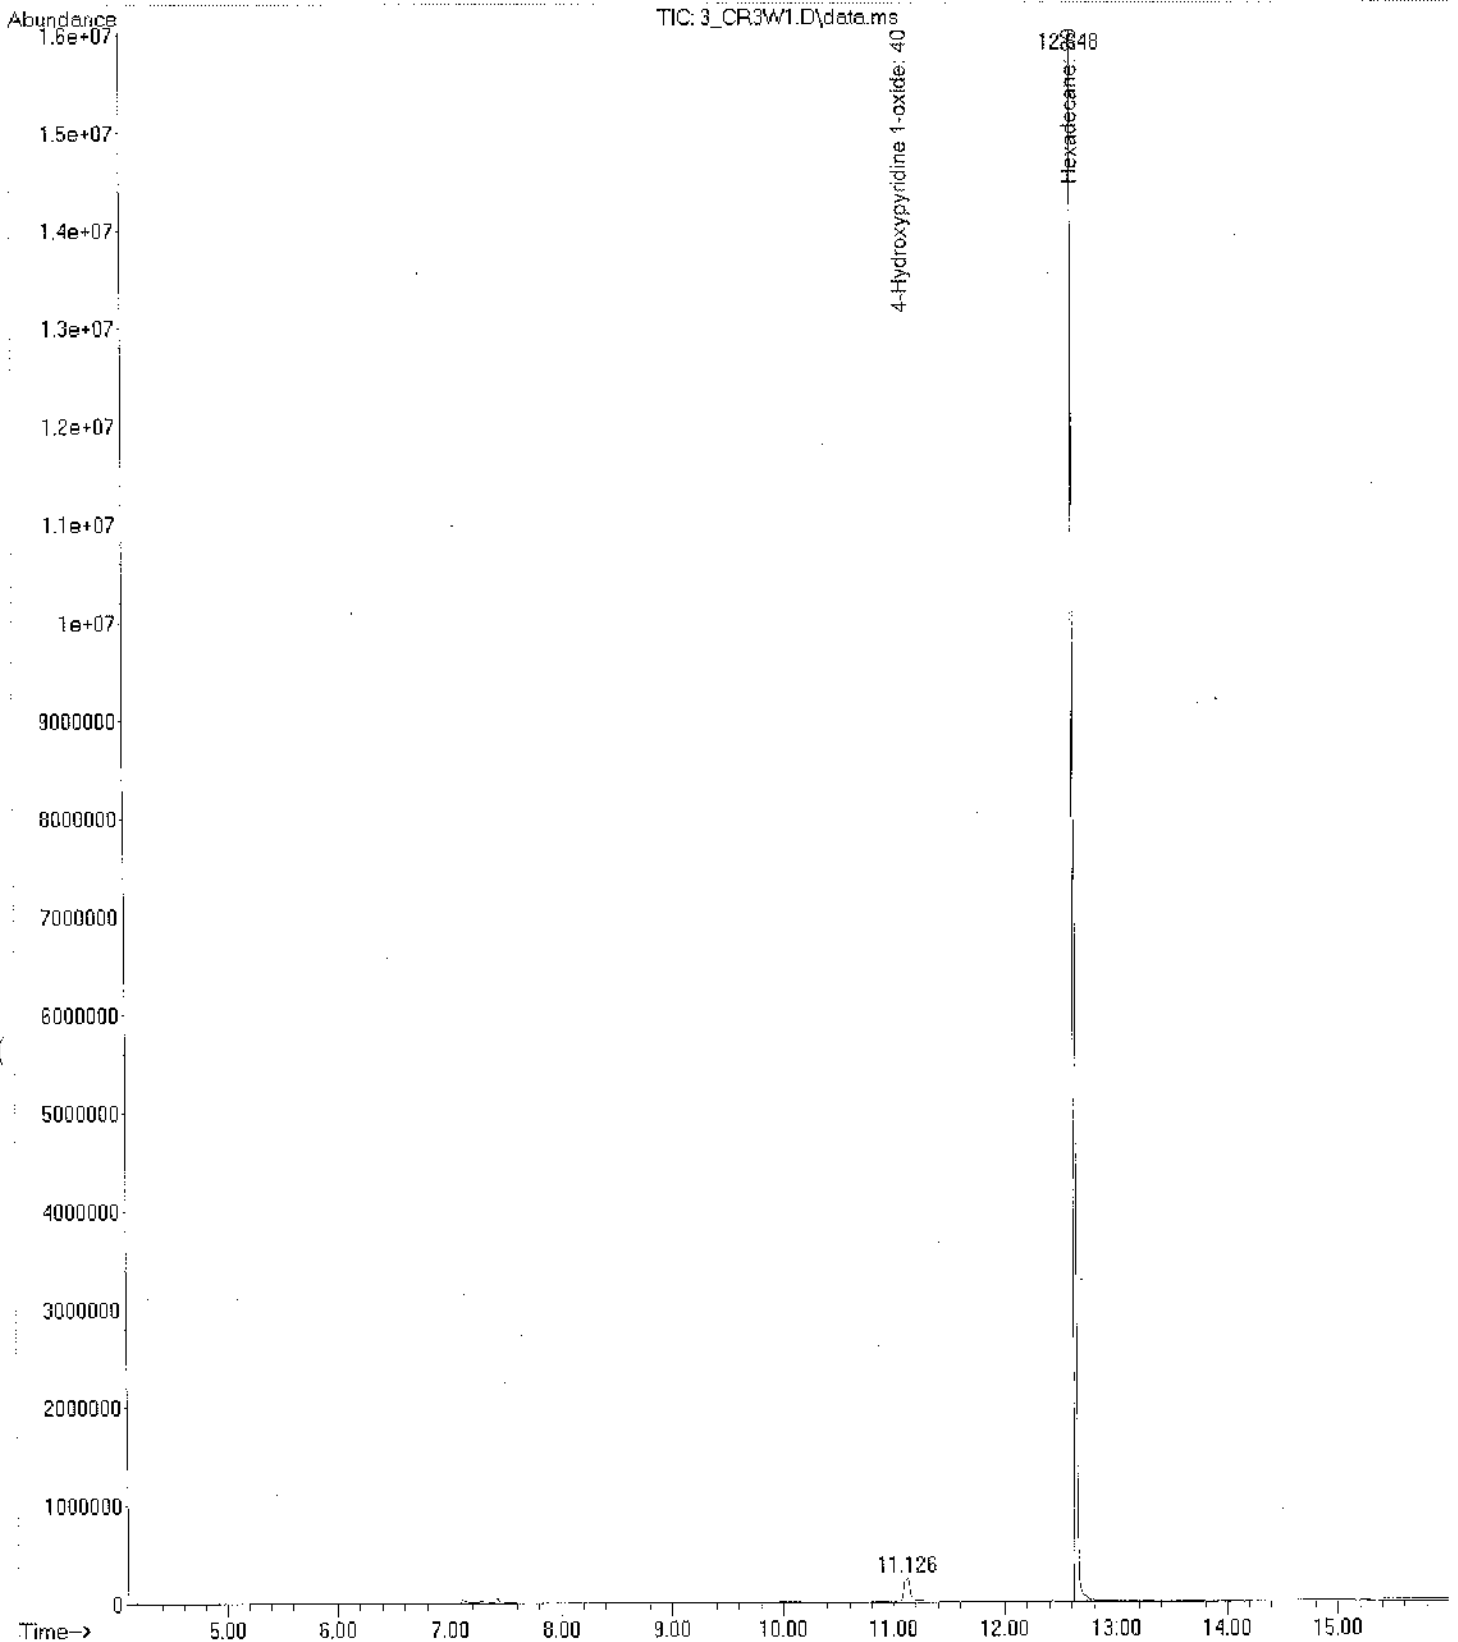

Area Percent Report

Data Path : C:\msdchem\1\data\Madushika\  
 Data File : 3\_CR3W1.D  
 Acq On : 10 Jun 2016 10:34  
 Operator :  
 Sample : 3\_CR3W1  
 Misc :  
 ALS Vial : 3 Sample Multiplier: 1

Integration Parameters: autoint1.e  
 Integrator: ChemStation

Method : C:\msdchem\1\methods\Calibration plot\_Ace.M  
 Title : autoint1.e

Signal : TIC: 3\_CR3W1.D\data.ms

| Peak # | R.T. min | first scan | max scan | last scan | PK TY | peak height | corr. area | corr. % max. | % of total |
|--------|----------|------------|----------|-----------|-------|-------------|------------|--------------|------------|
| 1      | 11.126   | 1160       | 1192     | 1218      | BB    | 218724      | 8923751    | 5.40%        | 5.123%     |
| 2      | 12.648   | 1440       | 1450     | 1483      | BB    | 15222188    | 165266112  | 100.00%      | 94.877%    |

Sum of corrected areas: 174189863

Calibration plot\_Ace.M Mon Jun 13 09:59:25 2016



File : C:\msdchem\1\data\Madushika\4\_CC1W1.D  
Operator :  
Acquired : 10 Jun 2016 10:56 using AcqMethod MADUSHIKA.M  
Instrument : UOSJP GCMSD  
Sample Name: 4\_CC1W1  
Misc Info : ERR  
Vial Number: 4

CC1 ⇒ control 1  
of MM1 fungi

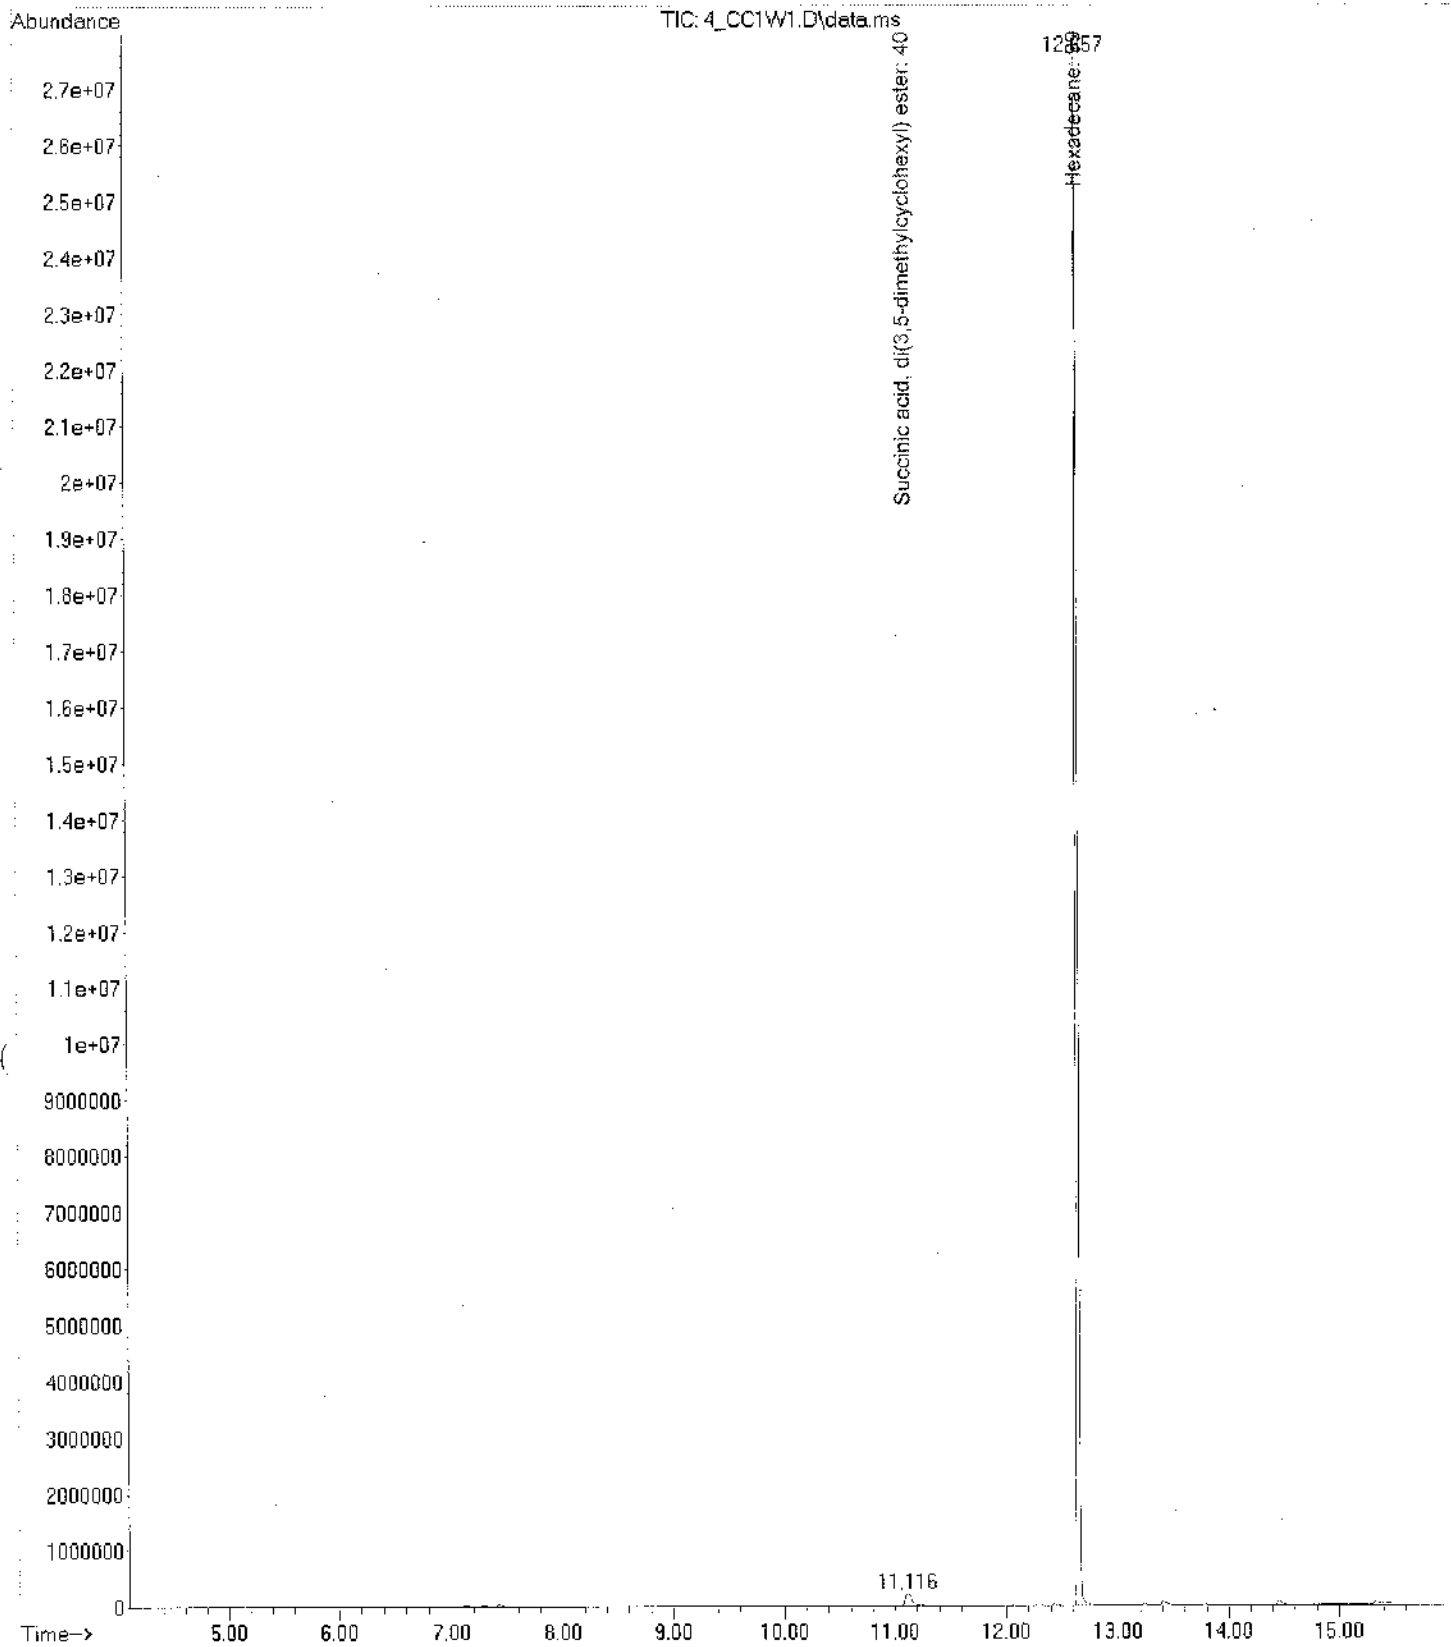

Area Percent Report

Data Path : C:\msdchem\1\data\Madushika\  
Data File : 4\_CC1W1.D  
Acq On : 10 Jun 2016 10:56  
Operator :  
Sample : 4\_CC1W1  
Misc :  
ALS Vial : 4 Sample Multiplier: 1

Integration Parameters: autoint1.e  
Integrator: ChemStation

Method : C:\msdchem\1\methods\Calibration plot\_Ace.M  
Title : autoint1.e

Signal : TIC: 4\_CC1W1.D\data.ms

| Peak # | R.T. min | first scan | max scan | last scan | PK TY | peak height | corr. area | corr. % max. | % of total |
|--------|----------|------------|----------|-----------|-------|-------------|------------|--------------|------------|
| 1      | 11.116   | 1161       | 1191     | 1217      | BB 3  | 184670      | 8044345    | 2.04%        | 2.003%     |
| 2      | 12.657   | 1407       | 1452     | 1481      | BB    | 26051900    | 393472335  | 100.00%      | 97.997%    |

Sum of corrected areas: 401516680

Calibration plot\_Ace.M Mon Jun 13 10:00:40 2016

File : C:\msdchem\1\data\Madushika\5\_CC2W1.D  
Operator :  
Acquired : 10 Jun 2016 11:17 using AcqMethod MADUSHIKA.M  
Instrument : UOSJP GCMSD  
Sample Name: 5\_CC2W1  
Misc Info : ERR  
Vial Number: 5

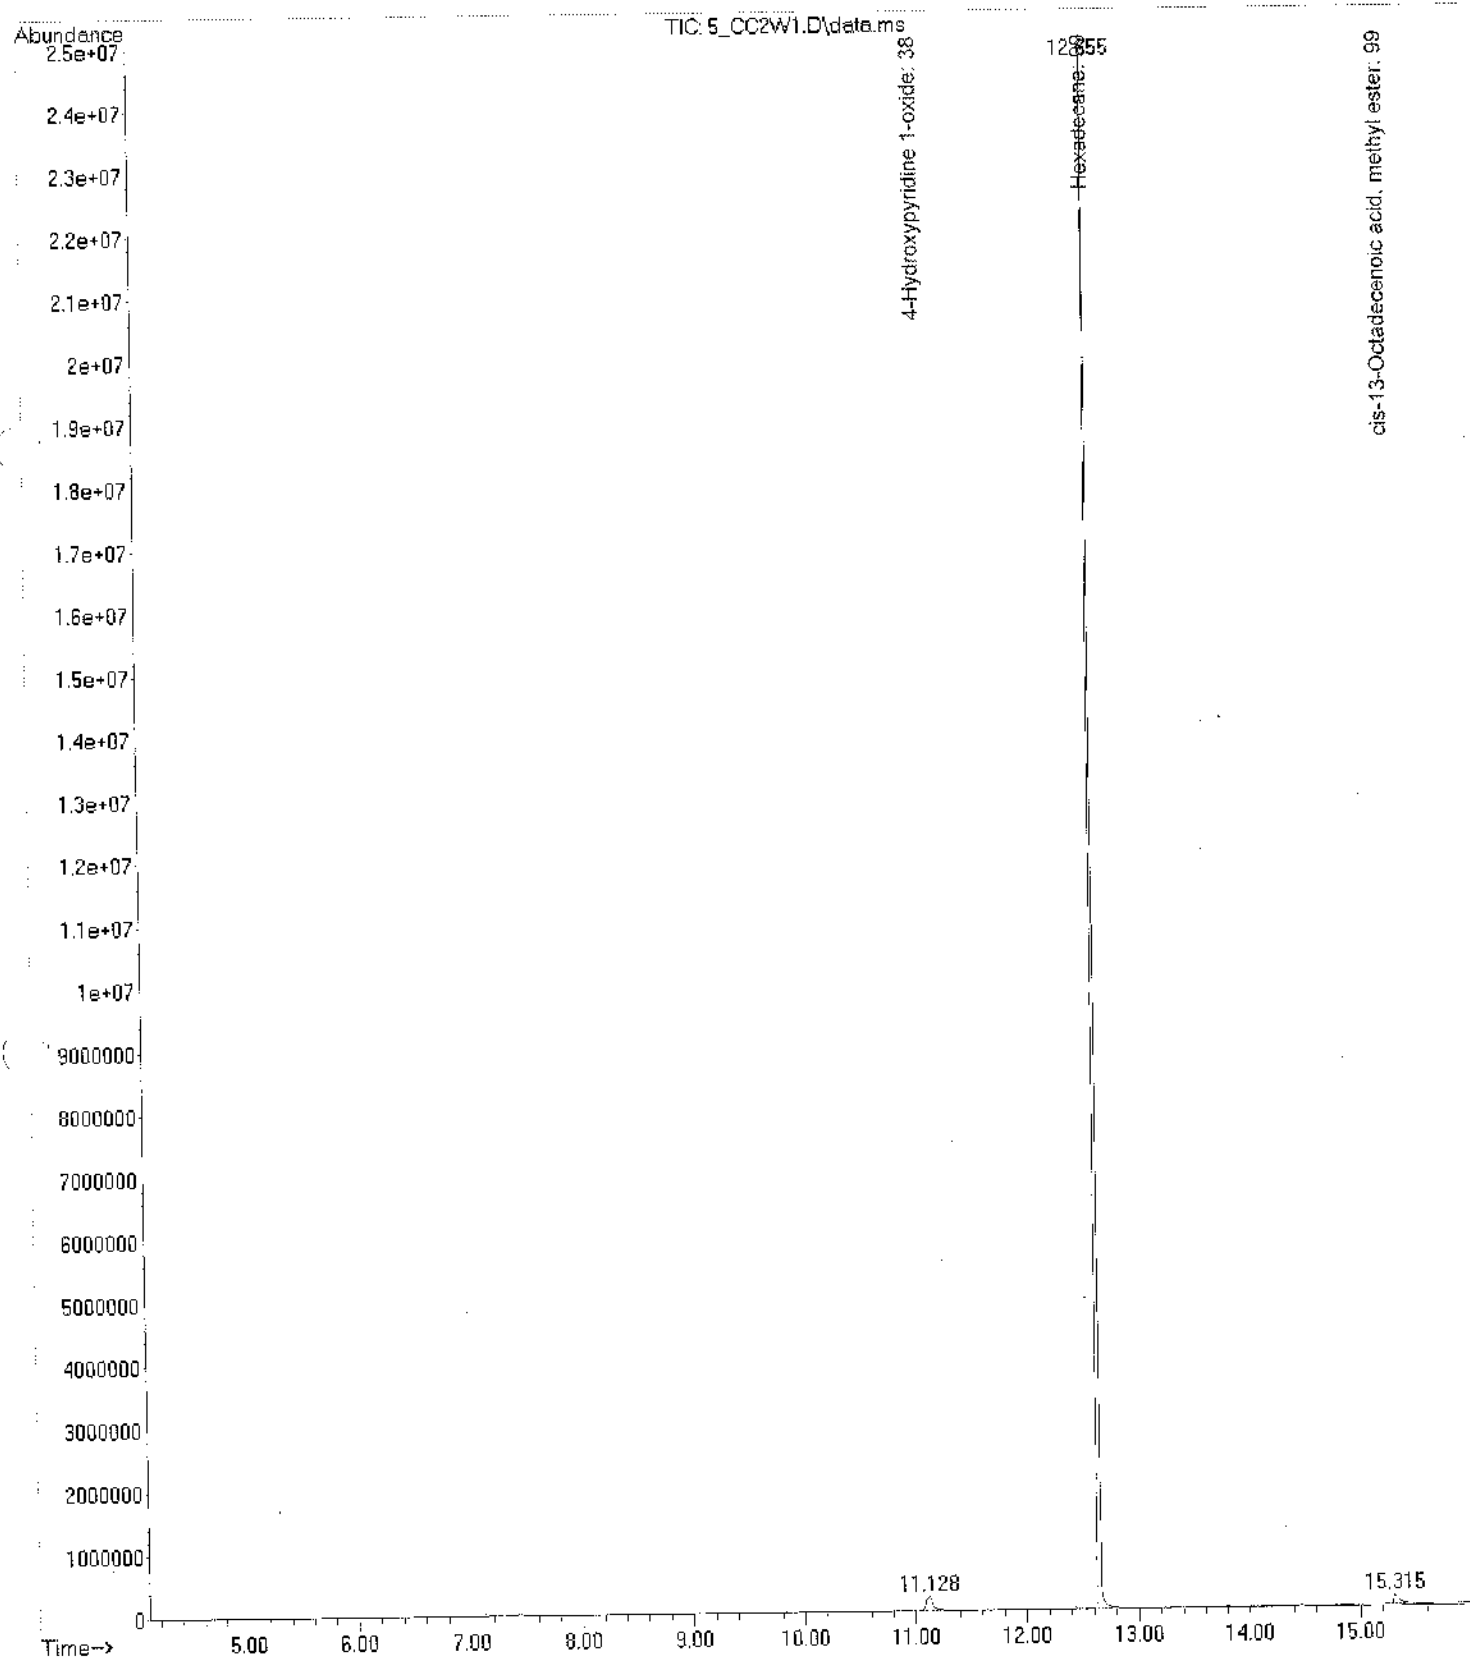

## Area Percent Report

Data Path : C:\msdchem\1\data\Madushika\  
Data File : 5\_CC2W1.D  
Acq On : 10 Jun 2016 11:17  
Operator :  
Sample : 5\_CC2W1  
Misc :  
ALS Vial : 5 Sample Multiplier: 1

Integration Parameters: autoint1.e  
Integrator: ChemStation

Method : C:\msdchem\1\methods\Calibration plot\_Ace.M  
Title : autoint1.e

Signal : TIC: 5\_CC2W1.D\data.ms

| Peak # | R.T. min | first scan | max scan | last scan | PK TY | peak height | corr. area | corr. % max. | % of total |
|--------|----------|------------|----------|-----------|-------|-------------|------------|--------------|------------|
| 1      | 11.128   | 1164       | 1193     | 1218      | BB    | 209905      | 8276886    | 2.54%        | 2.442%     |
| 2      | 12.655   | 1408       | 1451     | 1484      | BB    | 23101541    | 325934944  | 100.00%      | 96.152%    |
| 3      | 15.315   | 1874       | 1902     | 1931      | BB 2  | 133918      | 4766154    | 1.46%        | 1.406%     |

Sum of corrected areas: 338977984

Calibration plot\_Ace.M Mon Jun 13 10:01:49 2016

File : C:\msdchem\1\data\Madushika\6\_CC3W1.D  
Operator :  
Acquired : 10 Jun 2016 11:38 using AcqMethod MADUSHIKA.M  
Instrument : UOSJP GCMSD  
Sample Name : 6\_CC3W1  
Misc Info : ERR  
Vial Number : 6

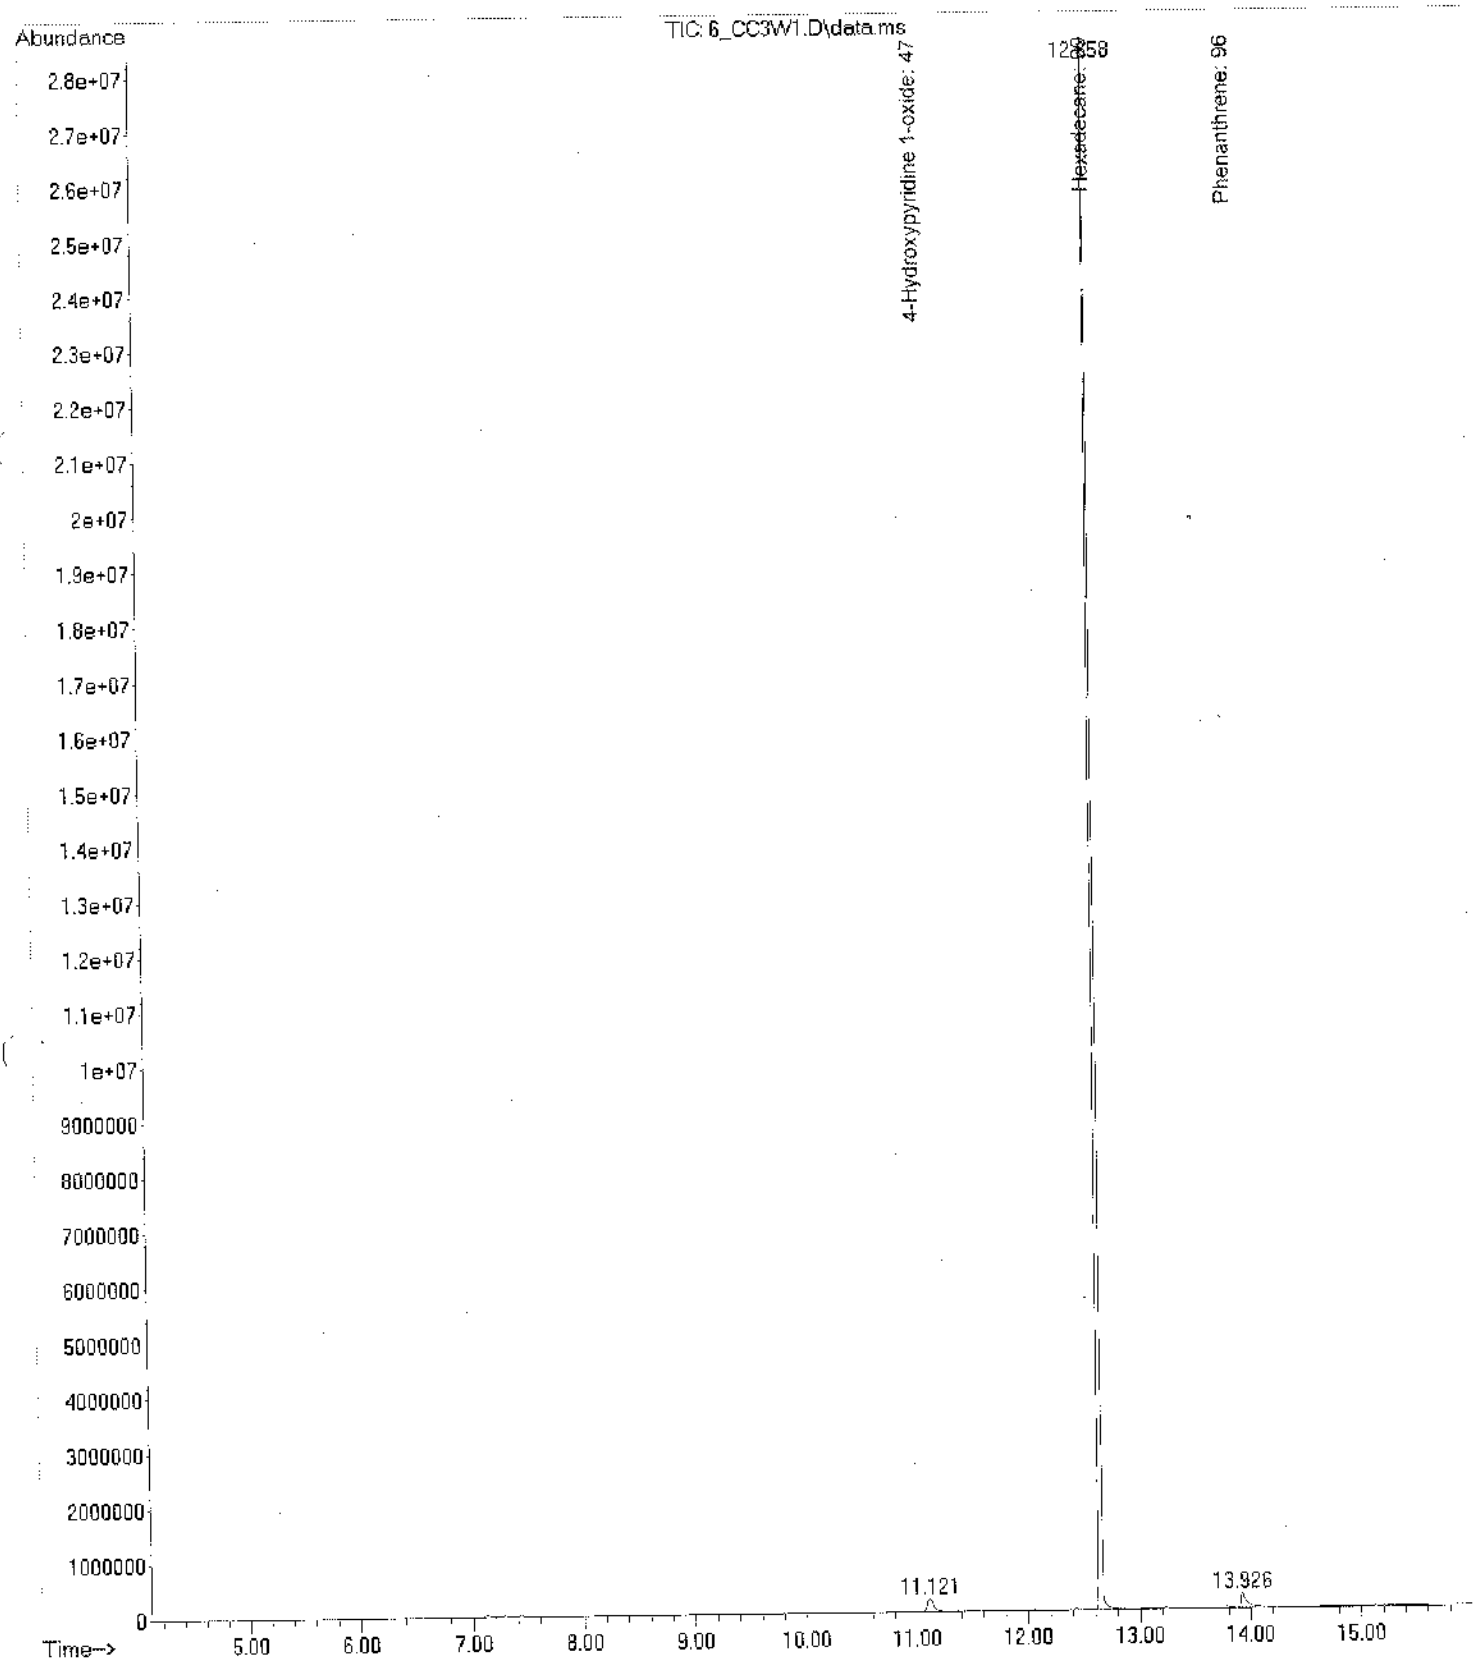

Area Percent Report

Data Path : C:\msdchem\1\data\Madushika\  
 Data File : 6\_CC3W1.D  
 Acq On : 10 Jun 2016 11:38  
 Operator :  
 Sample : 6\_CC3W1  
 Misc :  
 ALS Vial : 6 Sample Multiplier: 1

Integration Parameters: autoint1.e  
 Integrator: ChemStation

Method : C:\msdchem\1\methods\Calibration plot\_Ace.M  
 Title : autoint1.e

Signal : TIC: 6\_CC3W1.D\data.ms

| peak # | R.T. min | first scan | max scan | last scan | PK TY | peak height | corr. area | corr. % max. | % of total |
|--------|----------|------------|----------|-----------|-------|-------------|------------|--------------|------------|
| 1      | 11.121   | 1163       | 1192     | 1217      | BB 3  | 217680      | 8560779    | 1.98%        | 1.896%     |
| 2      | 12.658   | 1406       | 1452     | 1484      | BB    | 26678762    | 433449019  | 100.00%      | 96.008%    |
| 3      | 13.926   | 1656       | 1667     | 1703      | BB    | 244906      | 9462345    | 2.18%        | 2.096%     |

Sum of corrected areas: 451472143

Calibration plot\_Ace.M Mon Jun 13 10:02:58 2016

MMIBacR1

File : C:\msdchem\1\data\Madushika\1\_BR1W1.D  
Operator :  
Acquired : 10 Jun 2016 12:08 using AcqMethod MADUSHIKA.M  
Instrument : UOSJP GCMSD  
Sample Name: 1\_BR1W1  
Misc Info : ERR  
Vial Number: 1

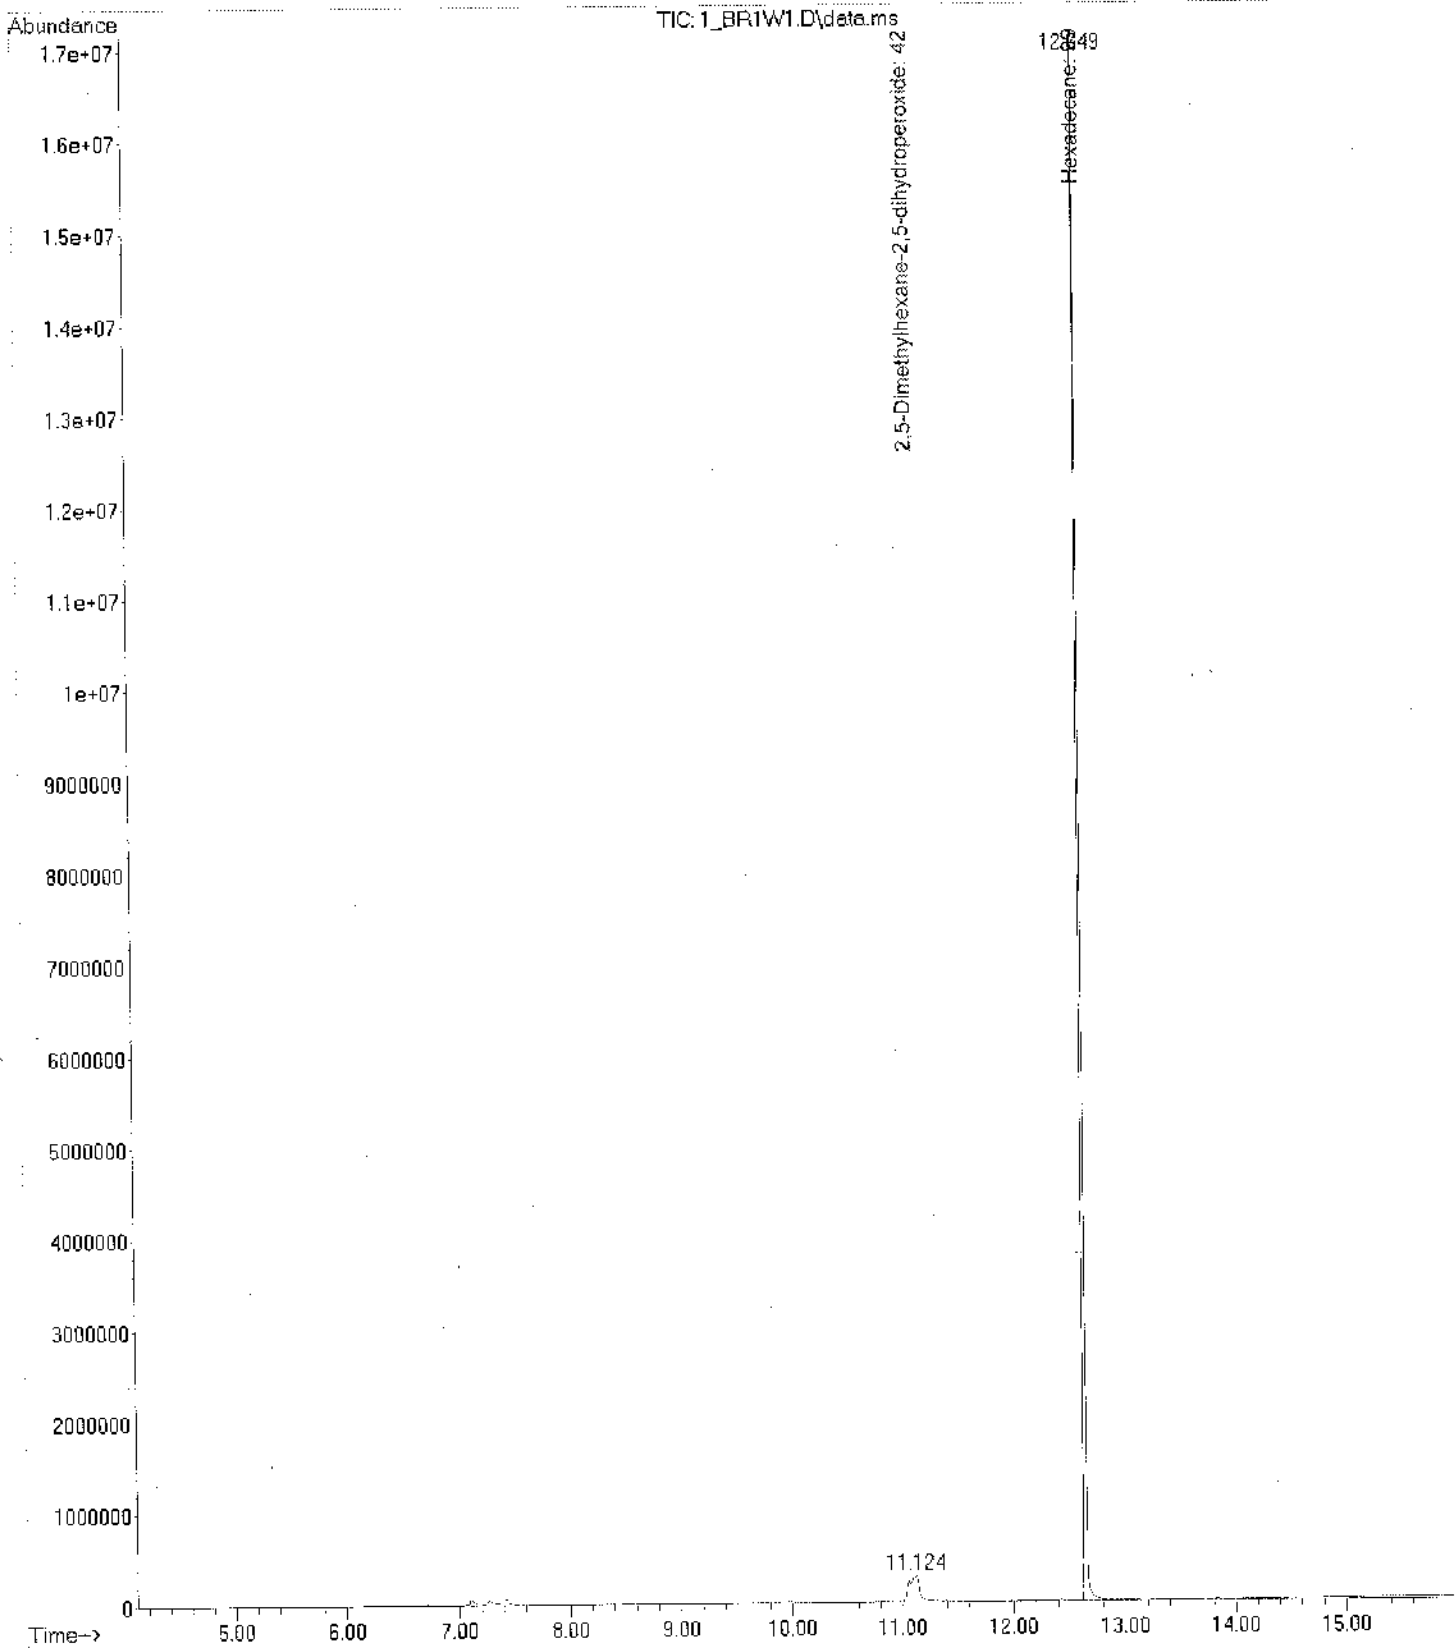

Area Percent Report

Data Path : C:\msdchem\1\data\Madushika\  
 Data File : 1\_BR1W1.D  
 Acq On : 10 Jun 2016 12:08  
 Operator :  
 Sample : 1\_BR1W1  
 Misc :  
 ALS Vial : 1 Sample Multiplier: 1

Integration Parameters: autoint1.e  
 Integrator: ChemStation

Method : C:\msdchem\1\methods\Calibration plot\_Ace.M  
 Title : autoint1.e

Signal : TIC: 1\_BR1W1.D\data.ms

| peak # | R.T. min | first scan | max scan | last scan | PK TY | peak height | corr. area | corr. % max. | % of total |
|--------|----------|------------|----------|-----------|-------|-------------|------------|--------------|------------|
| 1      | 11.124   | 1153       | 1192     | 1222      | BB    | 269796      | 16901064   | 8.69%        | 7.998%     |
| 2      | 12.649   | 1431       | 1450     | 1484      | BB    | 16502119    | 194408494  | 100.00%      | 92.002%    |

Sum of corrected areas: 211309559

Calibration plot\_Ace.M Mon Jun 13 09:57:14 2016



MMI Bac R2

File : C:\msdchem\1\data\Madushika\2\_BR2W1.D  
Operator :  
Acquired : 10 Jun 2016 12:29 using AcqMethod MADUSHIKA.M  
Instrument : UOSJP GCMSD  
Sample Name: 2\_BR2W1  
Misc Info : ERR  
Vial Number: 2

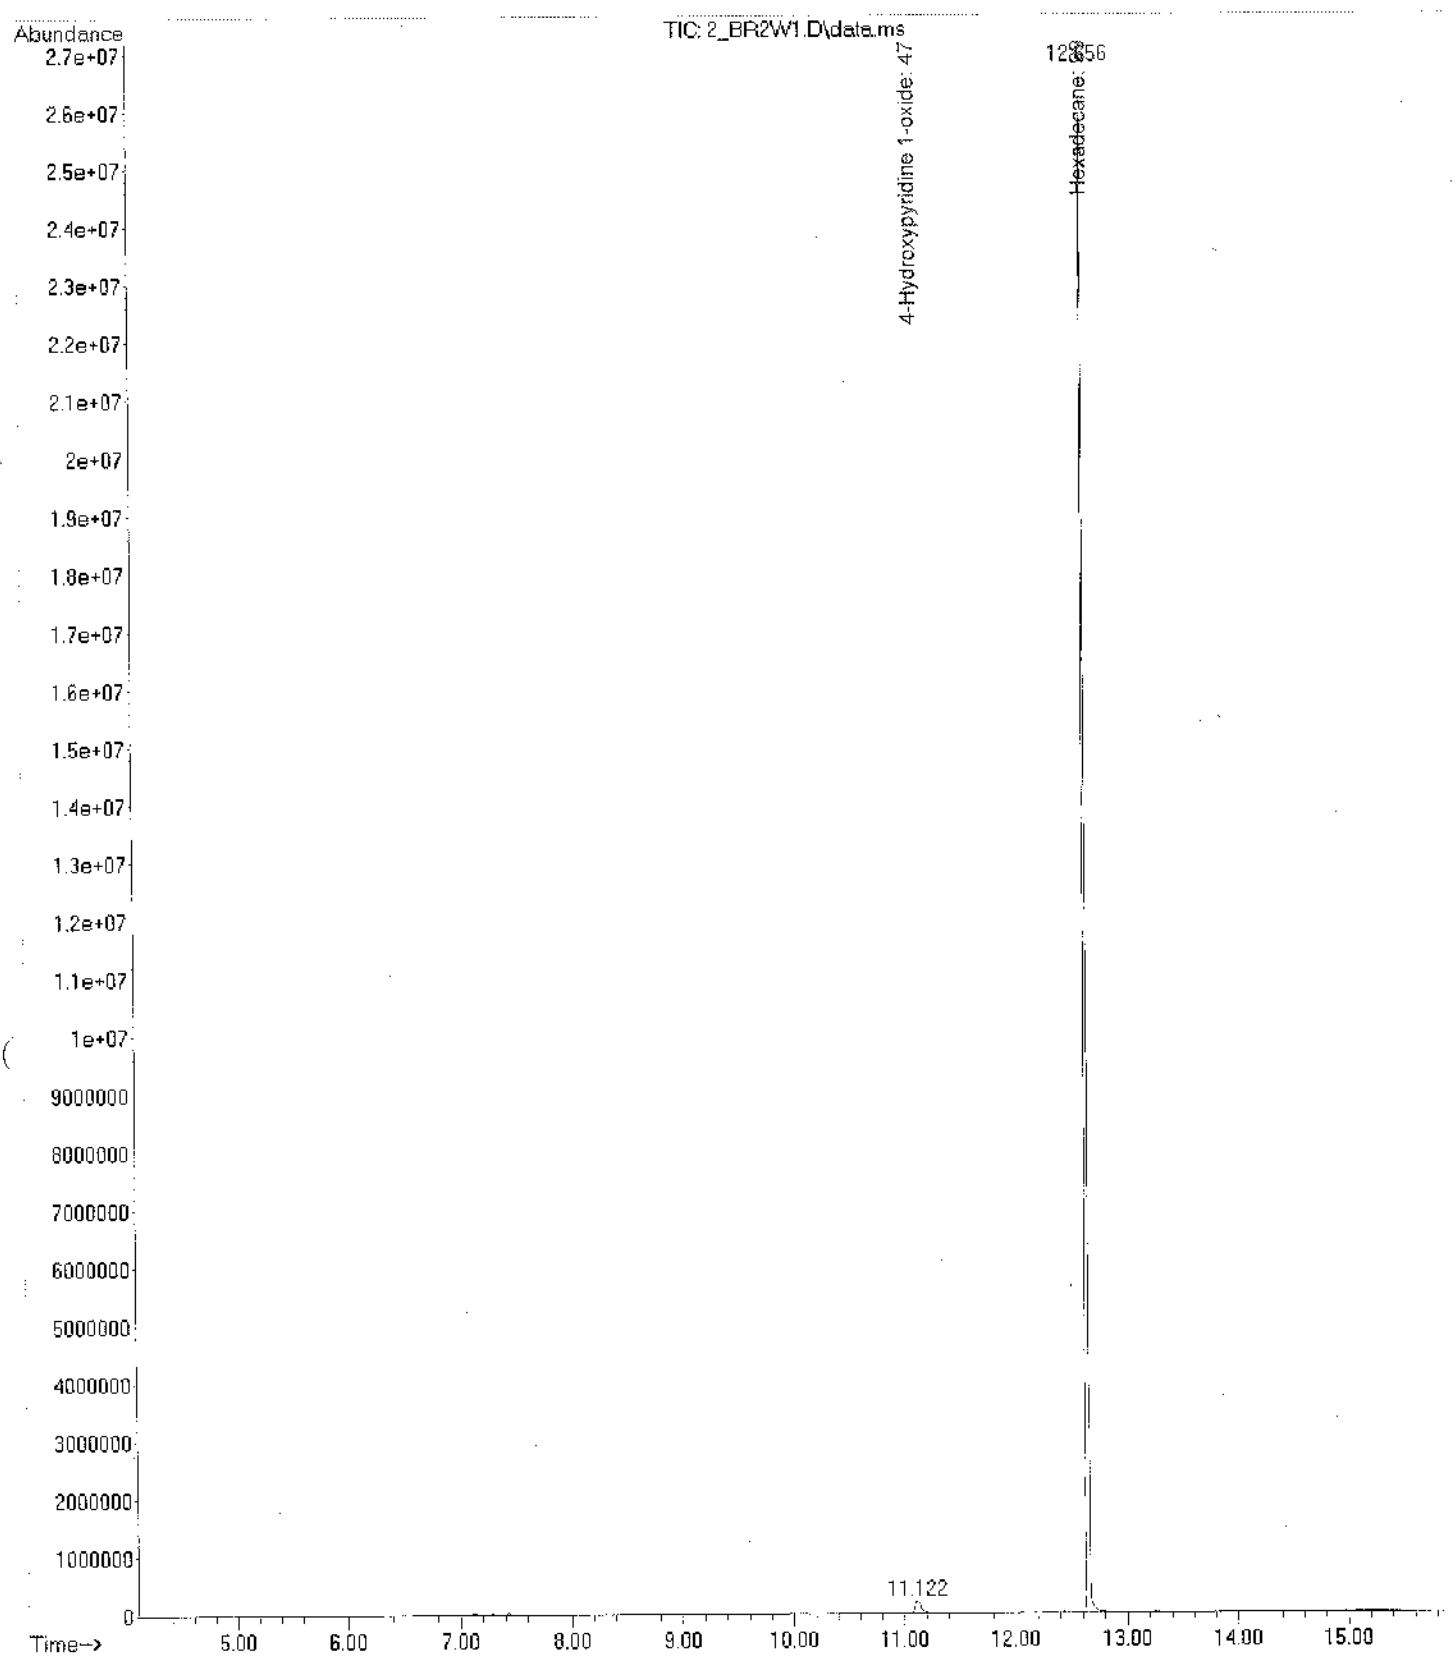

Area Percent Report

Data Path : C:\msdchem\1\data\Madushika\  
 Data File : 2\_BR2W1.D  
 Acq On : 10 Jun 2016 12:29  
 Operator :  
 Sample : 2\_BR2W1  
 Misc :  
 ALS Vial : 2 Sample Multiplier: 1

Integration Parameters: autoint1.e  
 Integrator: ChemStation

Method : C:\msdchem\1\methods\Calibration plot\_Ace.M  
 Title : autoint1.e

Signal : TIC: 2\_BR2W1.D\data.ms

| Peak # | R.T. min | first scan | max scan | last scan | PK TY | peak height | corr. area | corr. % max. | % of total |
|--------|----------|------------|----------|-----------|-------|-------------|------------|--------------|------------|
| 1      | 11.122   | 1172       | 1192     | 1215      | BB 4  | 189220      | 7545588    | 2.05%        | 2.011%     |
| 2      | 12.656   | 1406       | 1452     | 1484      | BB    | 26380862    | 367685282  | 100.00%      | 97.989%    |

Sum of corrected areas: 375230870

Calibration plot\_Ace.M Mon Jun 13 09:58:56 2016
