# Supplementary material for: Biofilm mediated synergistic degradation of hexadecane by a naturally formed community comprising Aspergillus flavus complex and Bacillus cereus group
Source: PubMed Central journal article supplement (PMC6489202; doi:10.1186/s12866-019-1460-4), 2019-04-29
Supplement: 12866_2019_1460_MOESM2_ESM.pdf [file 12866_2019_1460_MOESM2_ESM.pdf]

File : C:\msdchem\1\data\Madushika\3\_BR3W1.D  
Operator :  
Acquired : 10 Jun 2016 12:50 using AcqMethod MADUSHIKA.M  
Instrument : UOSJP GCMSD  
Sample Name : 3\_BR3W1  
Misc Info : ERR  
Vial Number : 3

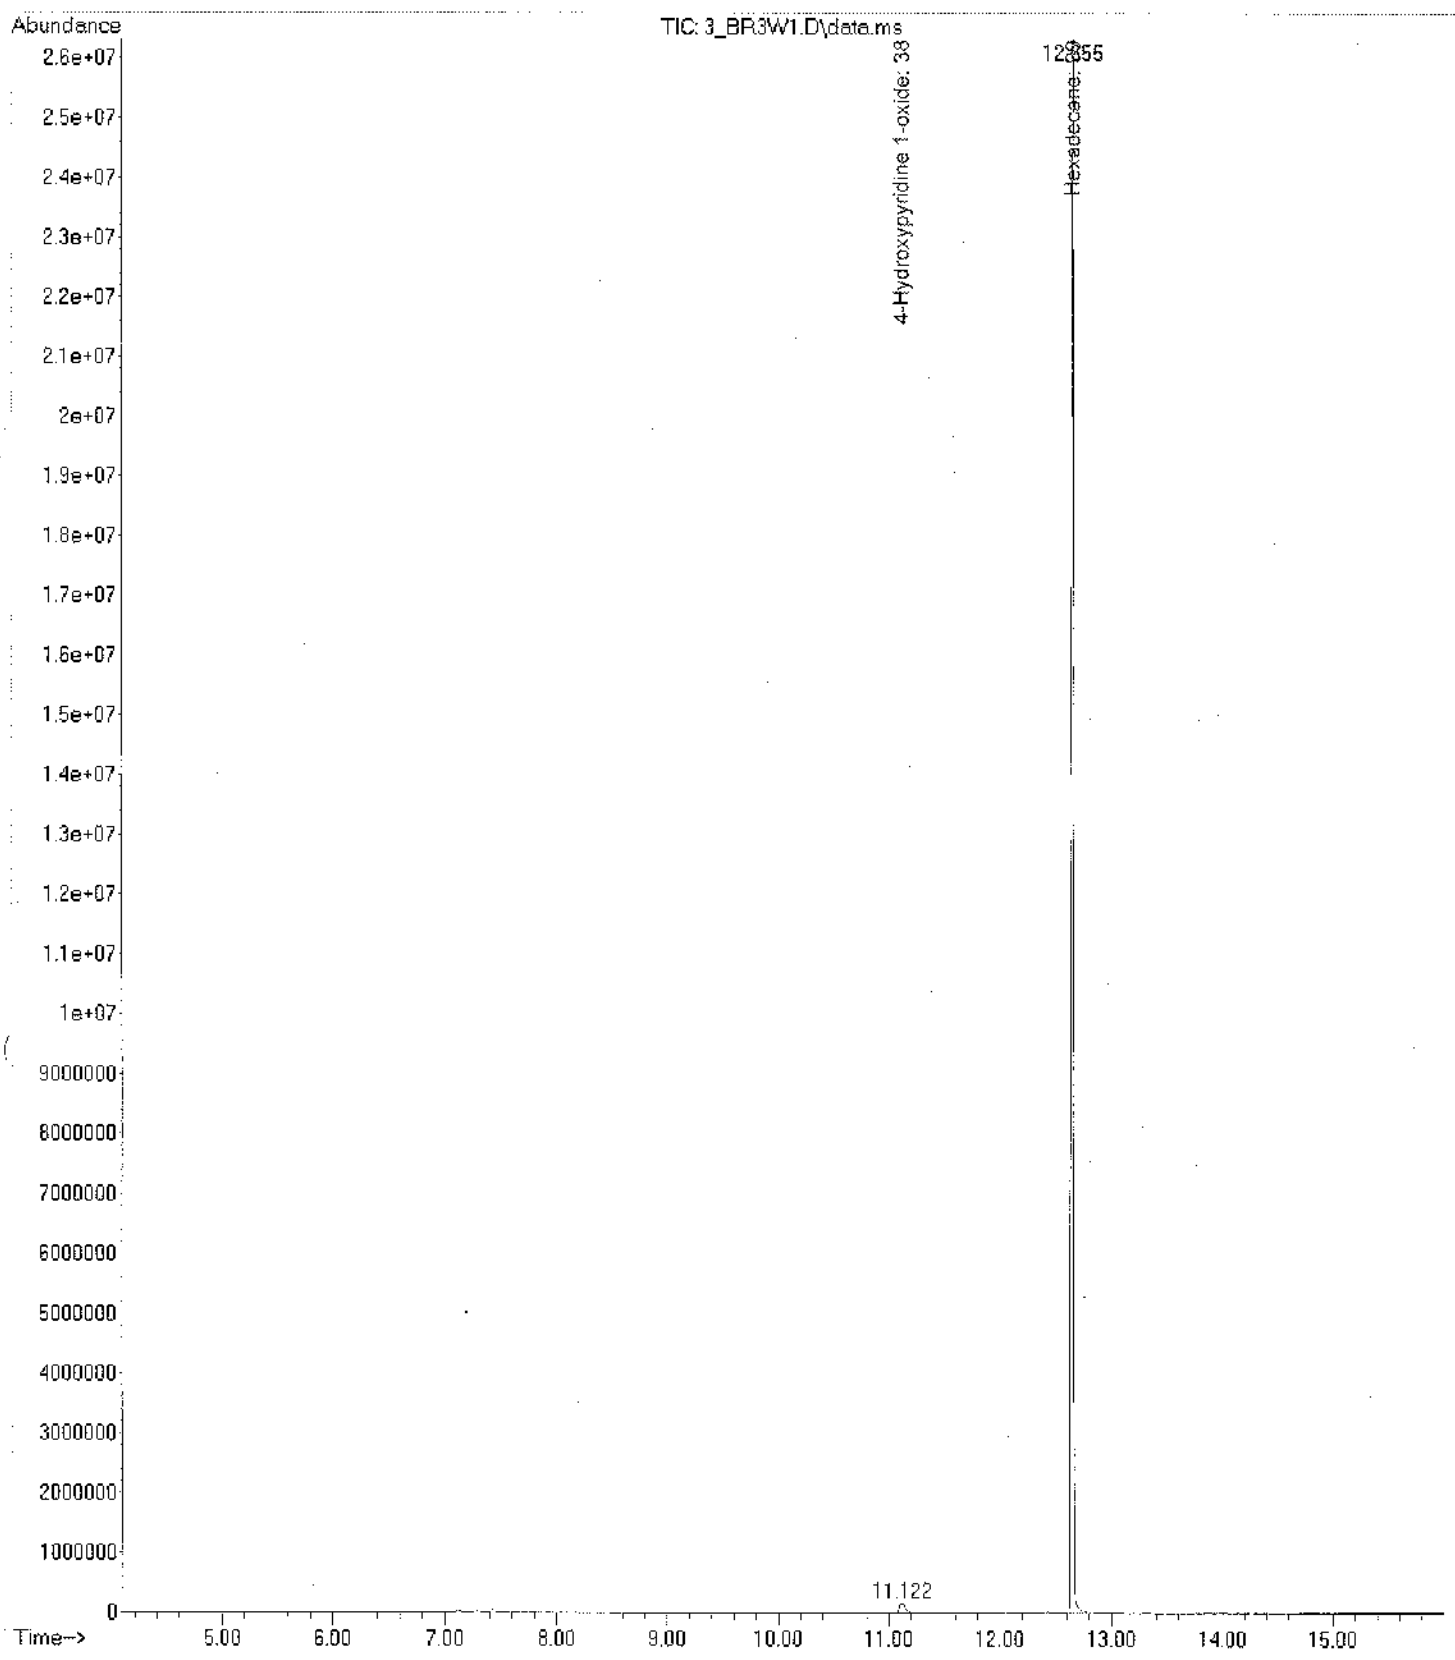

Area Percent Report

Data Path : C:\msdchem\1\data\Madushika\  
 Data File : 3\_BR3W1.D  
 Acq On : 10 Jun 2016 12:50  
 Operator :  
 Sample : 3\_BR3W1  
 Misc :  
 ALS Vial : 3 Sample Multiplier: 1

Integration Parameters: autoint1.e  
 Integrator: ChemStation

Method : C:\msdchem\1\methods\Calibration plot\_Ace.M  
 Title : autoint1.e

Signal : TIC: 3\_BR3W1.D\data.ms

| Peak # | R.T. min | first scan | max scan | last scan | PK TY | peak height | corr. area | corr. % max. | % of total |
|--------|----------|------------|----------|-----------|-------|-------------|------------|--------------|------------|
| 1      | 11.122   | 1165       | 1192     | 1217      | BB 2  | 140944      | 5995186    | 1.65%        | 1.622%     |
| 2      | 12.655   | 1406       | 1451     | 1483      | BB    | 25829469    | 363602615  | 100.00%      | 98.378%    |

Sum of corrected areas: 369597801

Calibration plot\_Ace.M Mon Jun 13 09:59:50 2016

File : C:\msdchem\1\data\Madushika\4\_BC1W1.D  
Operator :  
Acquired : 10 Jun 2016 13:11 using AcqMethod MADUSHIKA.M  
Instrument : UOSJP GCMSD  
Sample Name: 4\_BC1W1  
Misc Info : ERR  
Vial Number: 4

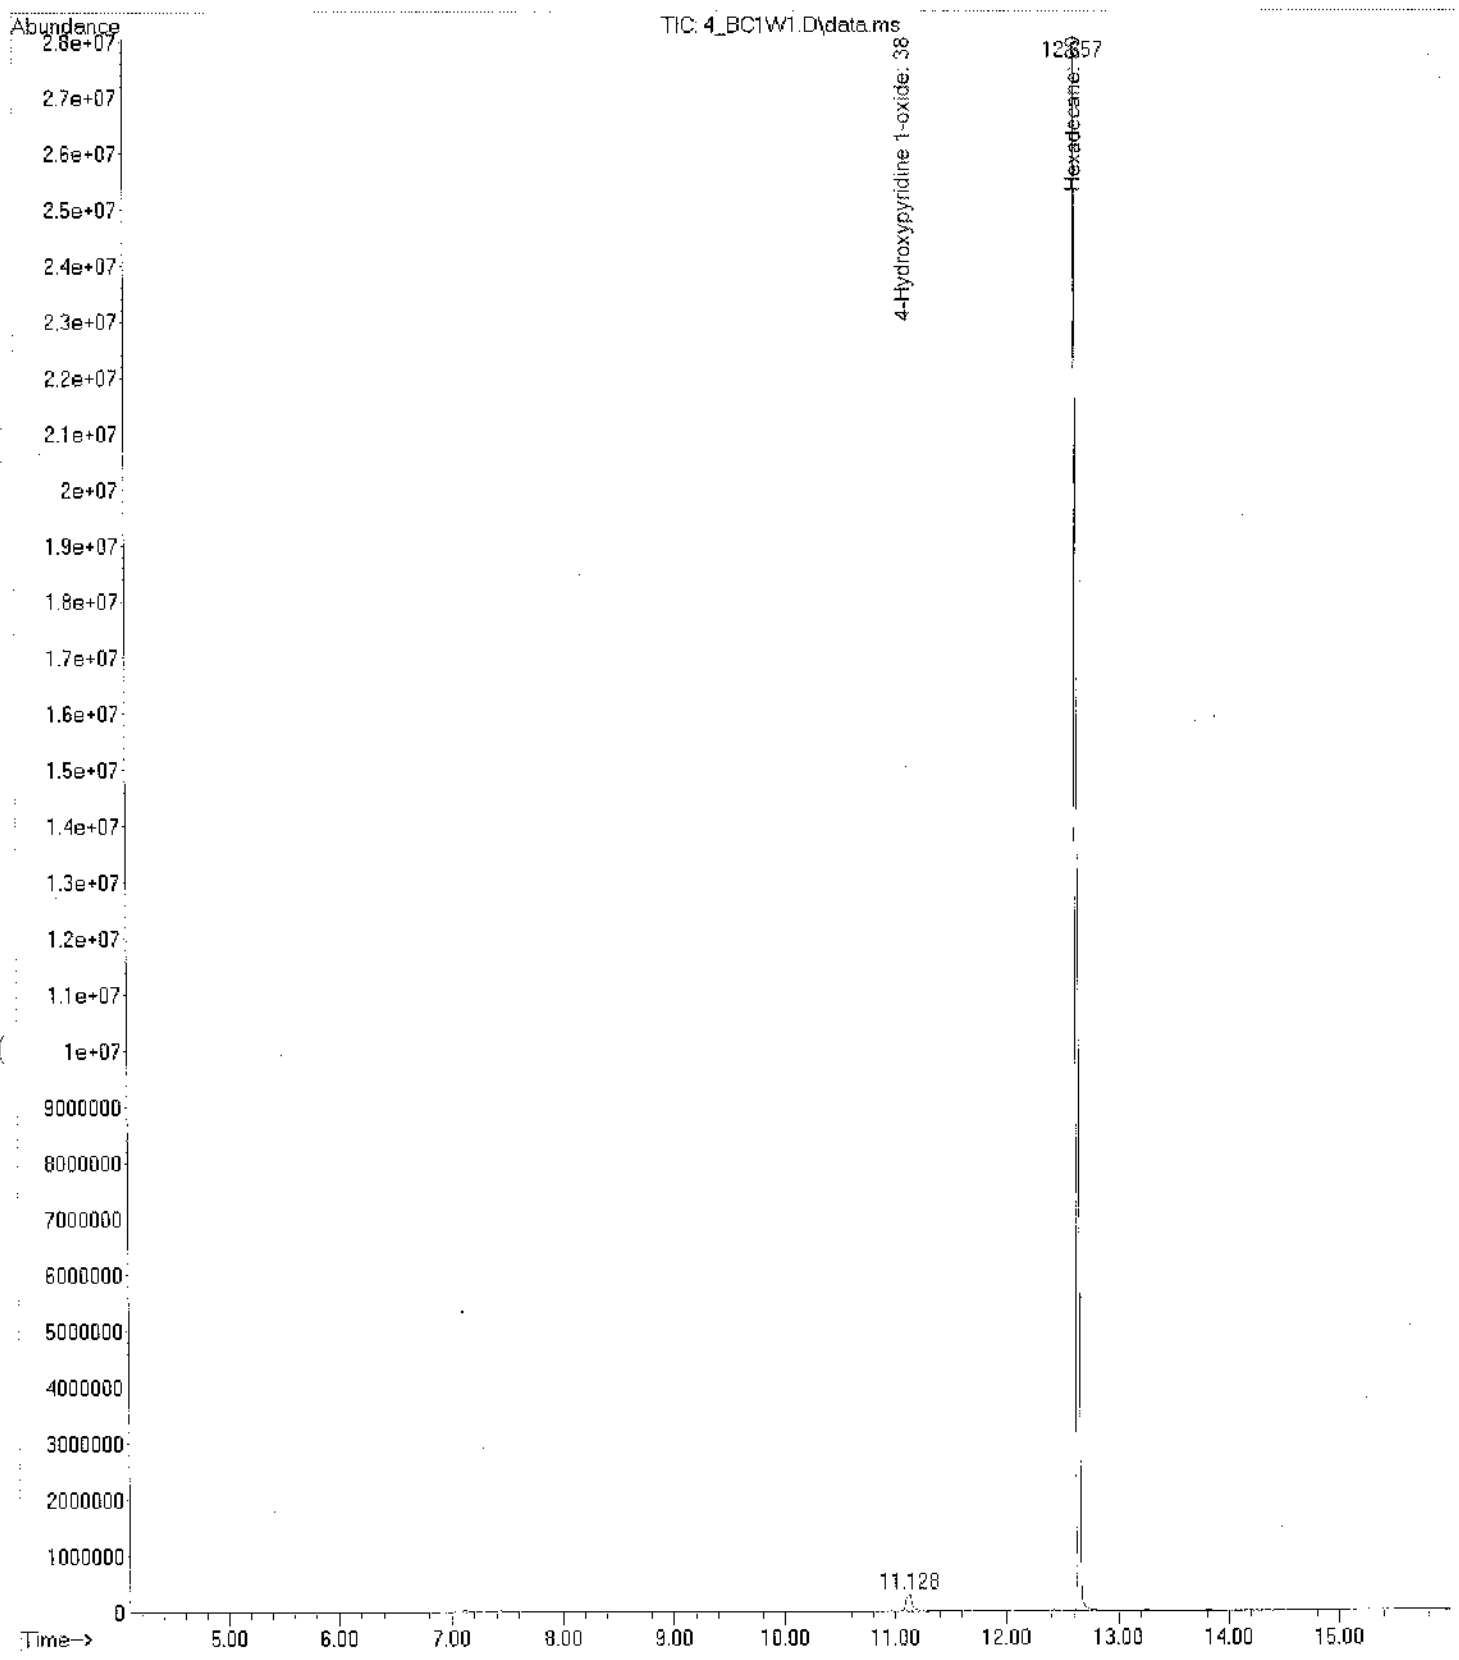

Area Percent Report

Data Path : C:\msdchem\1\data\Madushika\  
 Data File : 4\_BC1W1.D  
 Acq On : 10 Jun 2016 13:11  
 Operator :  
 Sample : 4\_BC1W1  
 Misc :  
 ALS Vial : 4 Sample Multiplier: 1

Integration Parameters: autoint1.e  
 Integrator: ChemStation

Method : C:\msdchem\1\methods\Calibration plot\_Ace.M  
 Title : autoint1.e

Signal : TIC: 4\_BC1W1.D\data.ms

| Peak # | R.T. min | first scan | max scan | last scan | PK TY | peak height | corr. area | corr. % max. | % of total |
|--------|----------|------------|----------|-----------|-------|-------------|------------|--------------|------------|
| 1      | 11.128   | 1165       | 1193     | 1220      | BB    | 276851      | 10738763   | 2.70%        | 2.626%     |
| 2      | 12.657   | 1406       | 1452     | 1484      | BB    | 26653306    | 398233417  | 100.00%      | 97.374%    |

Sum of corrected areas: 408972180

Calibration plot\_Ace.M Mon Jun 13 10:01:06 2016

MMI Bae Control

File : C:\msdchem\1\data\Madushika\5\_BC2W1.D  
Operator :  
Acquired : 10 Jun 2016 13:32 using AcqMethod MADUSHIKA.M  
Instrument : UOSJP GCMSD  
Sample Name : 5\_BC2W1  
Misc Info : ERR  
Vial Number : 5

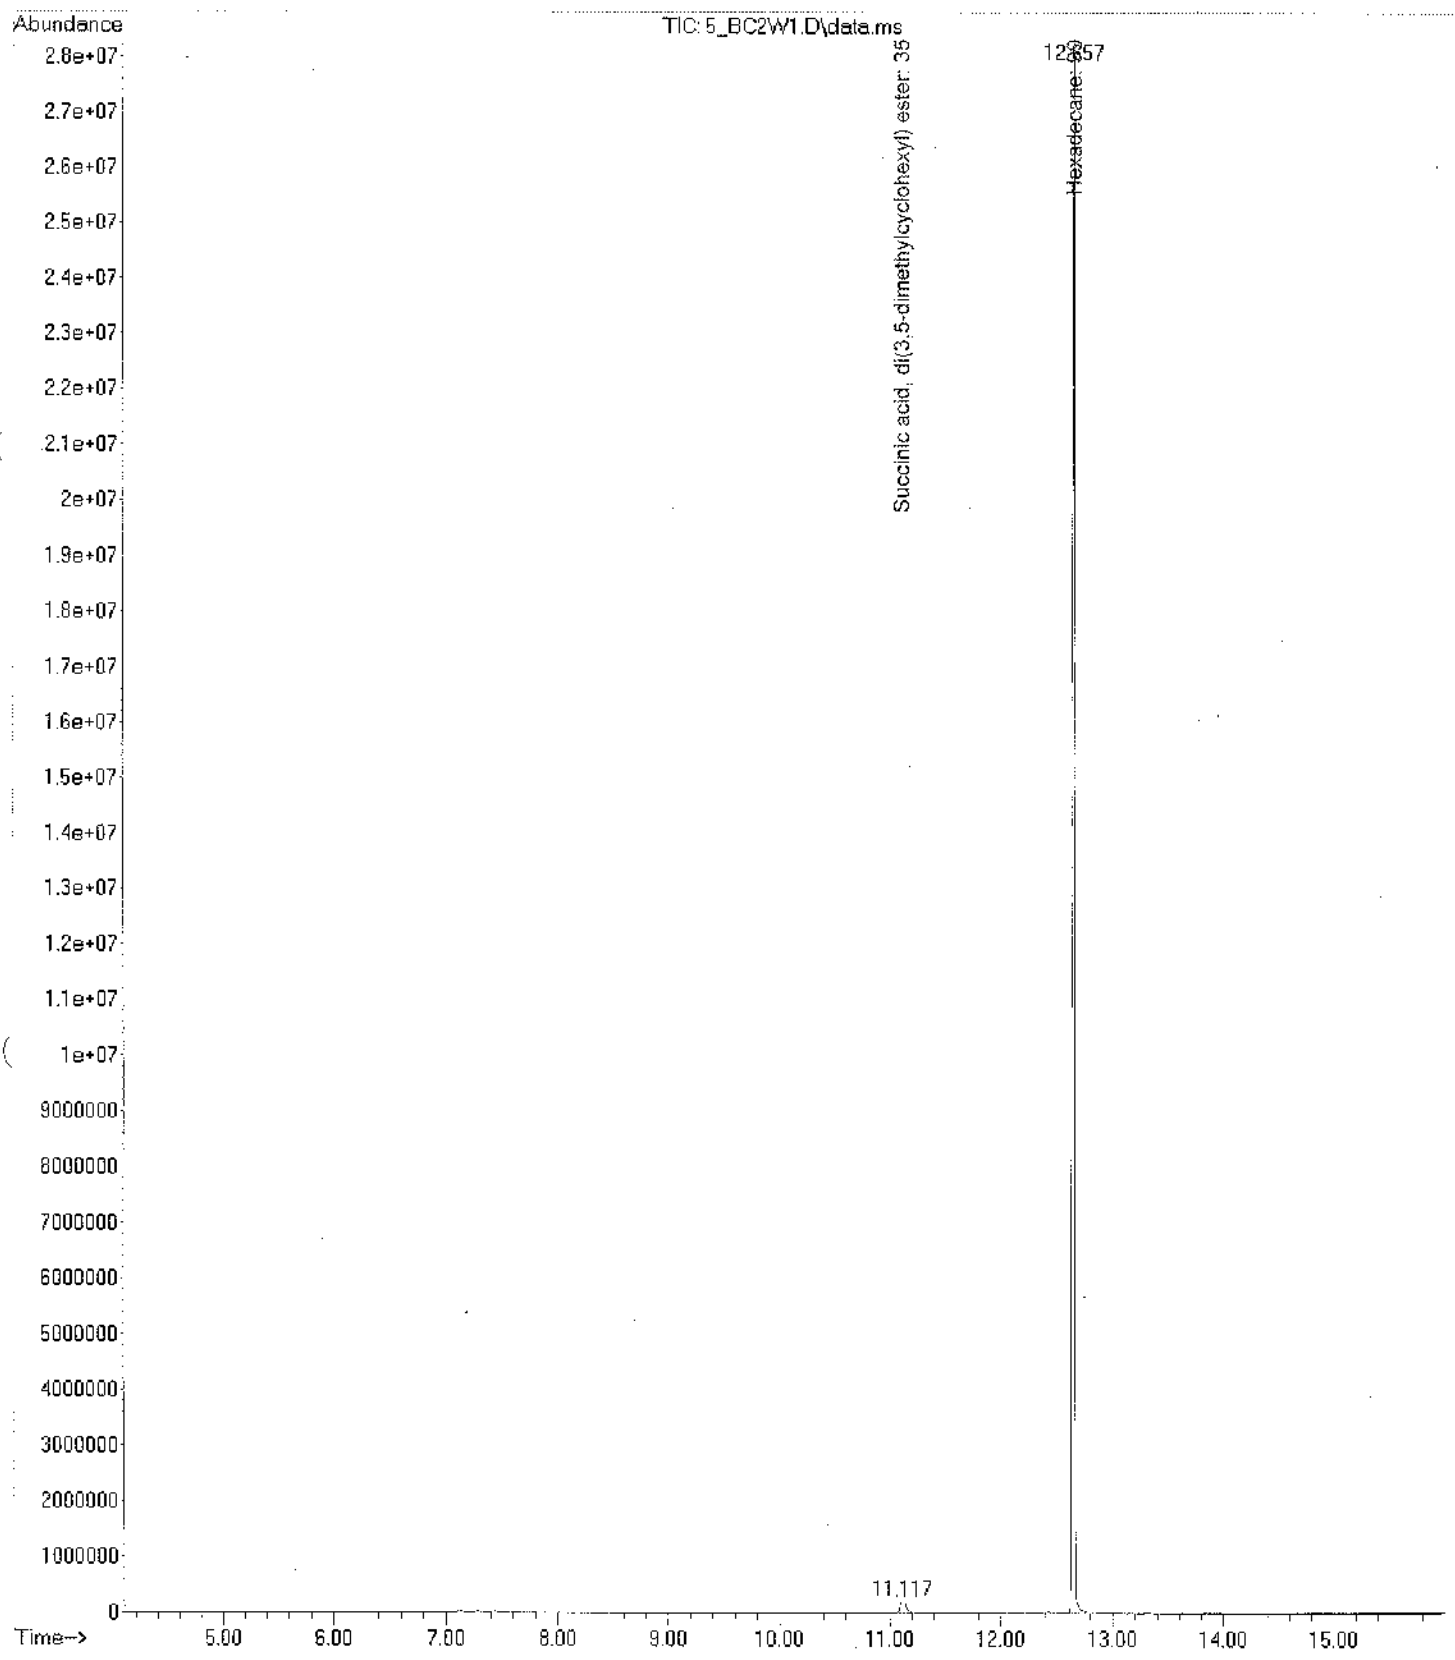

Area Percent Report

Data Path : C:\msdchem\1\data\Madushika\  
 Data File : 5\_BC2W1.D  
 Acq On : 10 Jun 2016 13:32  
 Operator :  
 Sample : 5\_BC2W1  
 Misc :  
 ALS Vial : 5 Sample Multiplier: 1

Integration Parameters: autoint1.e  
 Integrator: ChemStation

Method : C:\msdchem\1\methods\Calibration plot\_Ace.M  
 Title : autoint1.e

Signal : TIC: 5\_BC2W1.D\data.ms

| Peak # | R.T. min | first scan | max scan | last scan | PK TY | peak height | corr. area | corr. % max. | % of total |
|--------|----------|------------|----------|-----------|-------|-------------|------------|--------------|------------|
| 1      | 11.117   | 1165       | 1191     | 1217      | BB    | 192504      | 8276993    | 2.01%        | 1.970%     |
| 2      | 12.657   | 1405       | 1452     | 1484      | BB    | 26848778    | 411770923  | 100.00%      | 98.030%    |

Sum of corrected areas: 420047916

Calibration plot\_Ace.M Mon Jun 13 10:02:24 2016

MM1 Bac Control after  
2 weeks

File : C:\msdchem\1\data\Madushika\6\_BC3W1.D  
Operator :  
Acquired : 10 Jun 2016 13:53 using AcqMethod MADUSHIKA.M  
Instrument : UOSJP GCMSD  
Sample Name : 6\_BC3W1  
Misc Info : ERR  
Vial Number : 6

BC3W1

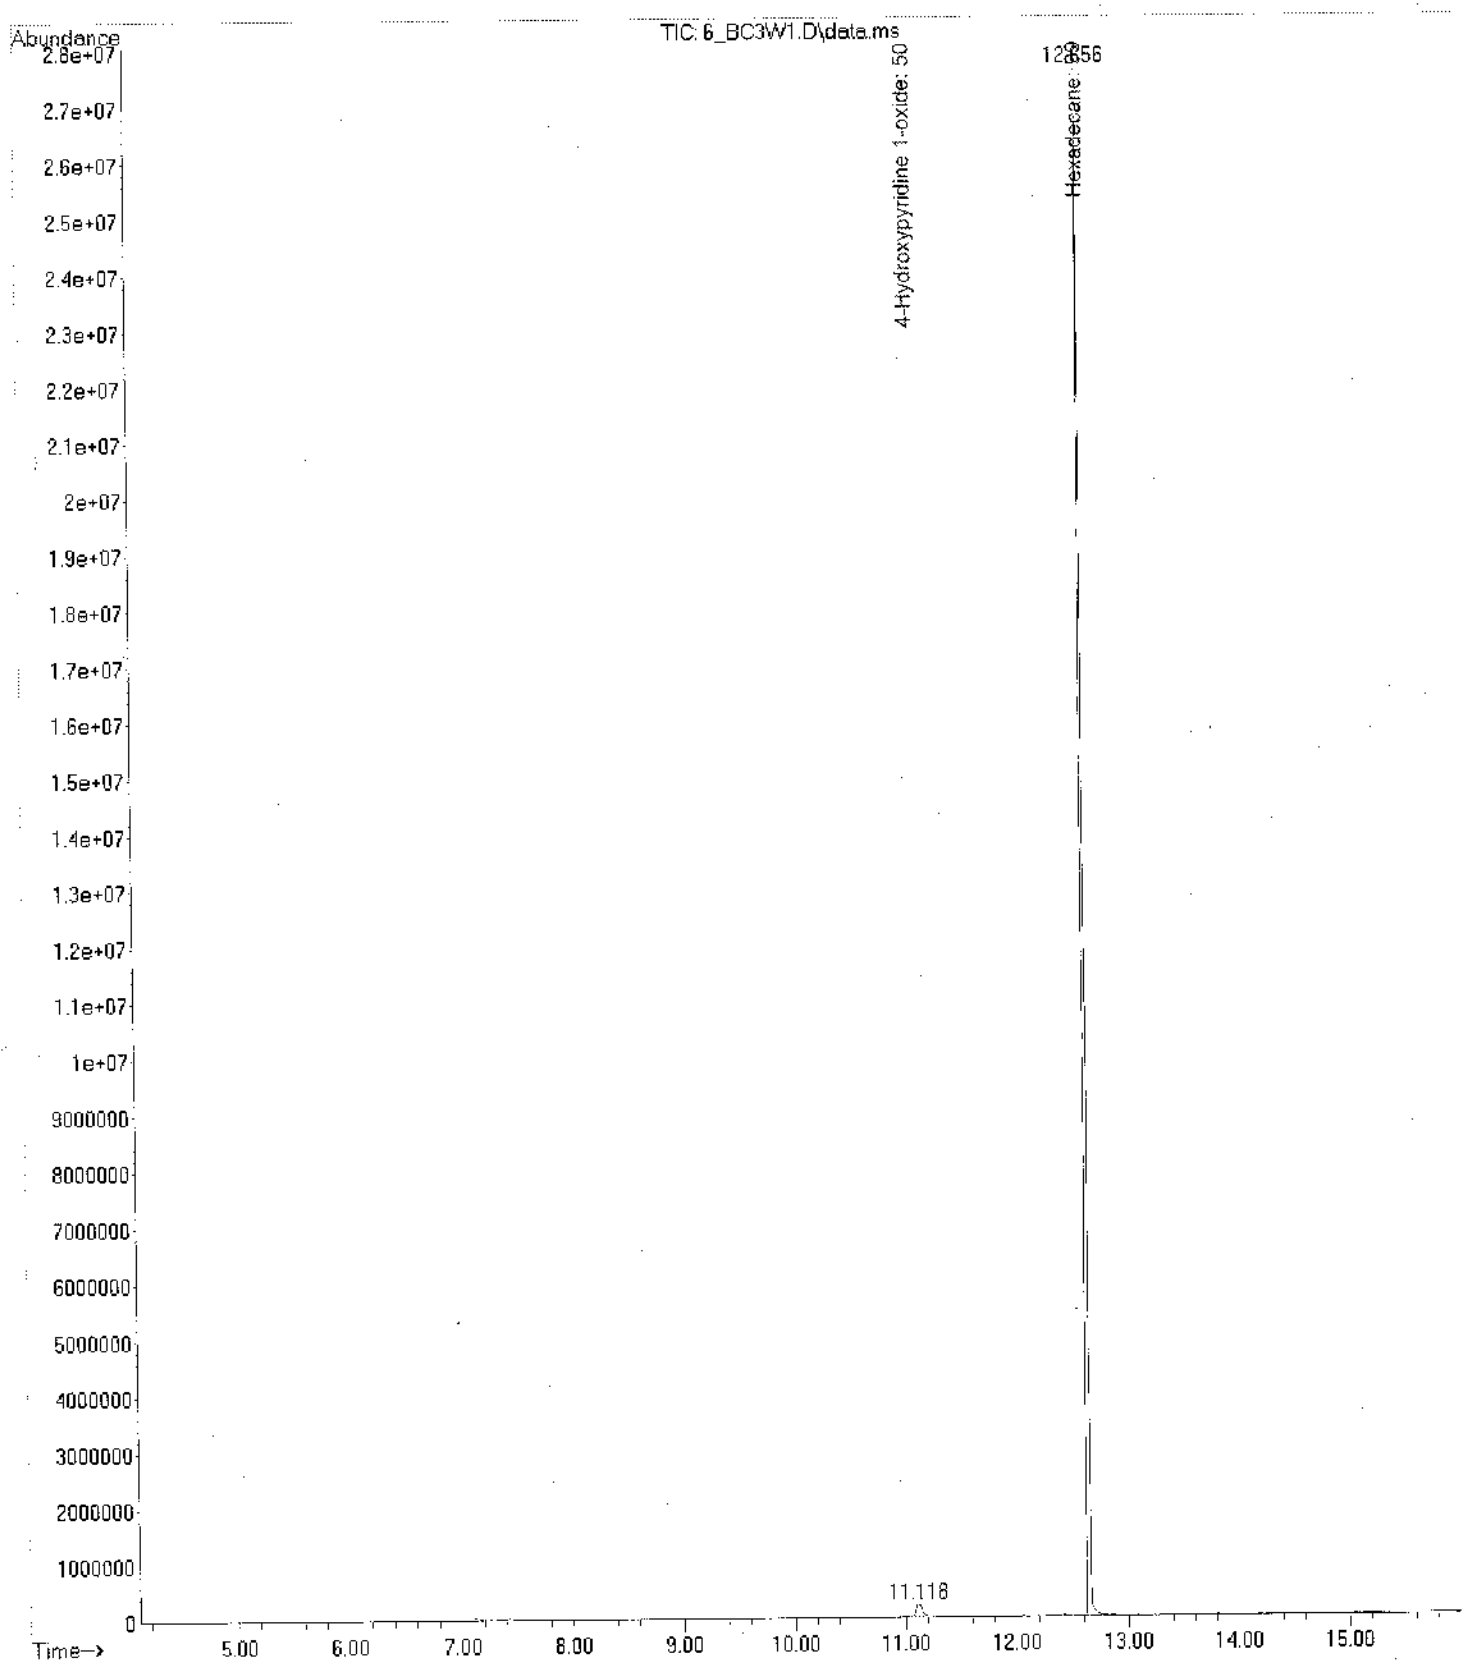

Area Percent Report

Data Path : C:\msdchem\1\data\Madushika\  
 Data File : 6\_BC3W1.D  
 Acq On : 10 Jun 2016 13:53  
 Operator :  
 Sample : 6\_BC3W1  
 Misc :  
 ALS Vial : 6 Sample Multiplier: 1

Integration Parameters: autoint1.e  
 Integrator: ChemStation

Method : C:\msdchem\1\methods\Calibration plot\_Ace.M  
 Title : autoint1.e

Signal : TIC: 6\_BC3W1.D\data.ms

| peak # | R.T. min | first scan | max scan | last scan | PK TY | peak height | corr. area | corr. % max. | % of total |
|--------|----------|------------|----------|-----------|-------|-------------|------------|--------------|------------|
| 1      | 11.118   | 1164       | 1191     | 1216      | BB 2  | 212590      | 8656772    | 2.33%        | 2.280%     |
| 2      | 12.656   | 1406       | 1452     | 1482      | BB    | 26477338    | 370955490  | 100.00%      | 97.720%    |

Sum of corrected areas: 379612262

Calibration plot\_Ace.M Mon Jun 13 10:03:25 2016
